# Supplementary material for: Evolutionary origins of the emergent ST796 clone of vancomycin resistant Enterococcus faecium
Source: PeerJ. 2017 Jan 24;5:e2916. doi: 10.7717/peerj.2916 (PMC5267571; doi:10.7717/peerj.2916)
Supplement: Table S2 [file peerj-05-2916-s004.xlsx]

## Sheet: Sheet1
Supplementary Table S2
Chromosome position	Present in ST555-796_MRCA	Present in ST796_MRCA	PRODUCT	EFFECT
240592	YES	NO	deoxynucleoside kinase	synonymous_variant c.192A>C p.Ile64Ile
249610	YES	NO	GntR family transcriptional regulator	missense_variant c.121A>G p.Arg41Gly
1022341	YES	NO	A/G-specific adenine glycosylase	synonymous_variant c.60T>C p.Phe20Phe
1037969	YES	NO	2-hydroxy-3-oxopropionate reductase	missense_variant c.287A>G p.Asn96Ser
1063912	YES	NO	transcriptional regulator, RpiR family	missense_variant c.280C>A p.Leu94Ile
1141853	YES	NO	hypothetical protein	missense_variant c.109A>G p.Ser37Gly
1166434	YES	NO	intergenic	intergenic_variant [add the change]
1167583	YES	NO	intergenic	intergenic_variant [add the change]
1206233	YES	NO	intergenic	intergenic_variant [add the change]
1238571	YES	NO	ABC transporter ATPase protein	missense_variant c.49G>A p.Val17Ile
1241248	YES	NO	hypothetical protein	missense_variant c.175C>A p.Leu59Ile
1250994	YES	NO	response regulator receiver domain protein	missense_variant c.656A>G p.Gln219Arg
1265275	YES	NO	hypothetical protein	synonymous_variant c.237G>A p.Gly79Gly
1265574	YES	NO	hypothetical protein	missense_variant c.536C>A p.Pro179His
1298607	YES	NO	dihydrolipoamide S-succinyltransferase	missense_variant c.601T>C p.Ser201Pro
1304561	YES	NO	ATP-dependent DNA helicase RecQ	synonymous_variant c.30T>C p.Gly10Gly
1407566	YES	NO	amino acid permease	synonymous_variant c.1186A>C p.Arg396Arg
1632527	YES	NO	RNA binding protein S1	missense_variant c.229T>G p.Leu77Val
1650922	YES	NO	prephenate dehydratase	synonymous_variant c.297G>A p.Ser99Ser
1763076	YES	NO	uridylate kinase	missense_variant c.195T>A p.His65Gln
1952252	YES	NO	alpha-galactosidase	synonymous_variant c.1161A>G p.Leu387Leu
1960762	YES	NO	Multidrug resistance-like ATP-binding protein mdlA	missense_variant c.1330A>G p.Lys444Glu
1961599	YES	NO	Multidrug resistance-like ATP-binding protein mdlA	missense_variant c.493A>C p.Met165Leu
1962920	YES	NO	metal ion transporter	synonymous_variant c.213C>T p.Asn71Asn
1965059	YES	NO	hypothetical protein	synonymous_variant c.1077A>G p.Val359Val
1965862	YES	NO	hypothetical protein	missense_variant c.274T>C p.Phe92Leu
1966130	YES	NO	hypothetical protein	synonymous_variant c.6A>G p.Leu2Leu
1993652	YES	NO	preprotein translocase, SecA subunit	synonymous_variant c.1173A>G p.Gln391Gln
1996086	YES	NO	competence protein ComFC	missense_variant c.359G>A p.Arg120Lys
1996490	YES	NO	helicase	missense_variant c.1265T>C p.Val422Ala
1998138	YES	NO	PTS system, cellobiose-specific IIB component	synonymous_variant c.18T>C p.Ile6Ile
1998434	YES	NO	hypothetical protein	synonymous_variant c.117G>A p.Gly39Gly
2000414	YES	NO	hypothetical protein	synonymous_variant c.54T>C p.Val18Val
2004901	YES	NO	membrane protein	synonymous_variant c.36T>C p.Ile12Ile
2006048	YES	NO	ATP synthase F1, beta subunit	synonymous_variant c.1200T>C p.Ala400Ala
2042613	YES	NO	transcriptional regulator, GntR family	missense_variant c.1123T>G p.Ser375Ala
2124409	YES	NO	DNA repair protein RadC	synonymous_variant c.129C>T p.Pro43Pro
2138943	YES	NO	L-asparaginase	missense_variant c.850A>G p.Lys284Glu
2172274	YES	NO	metallo-beta-lactamase domain protein	missense_variant c.98T>C p.Ile33Thr
2217955	YES	NO	hypothetical protein	synonymous_variant c.66C>T p.Asn22Asn
2648848	YES	NO	ErfK/YbiS/YcfS/YnhG family protein	missense_variant c.775A>G p.Asn259Asp
118047	NO	YES	bifunctional glutamate--cysteine ligase/glutathione synthetase	missense_variant c.2216A>G p.Asp739Gly
1136526	NO	YES	methyltransferase	missense_variant c.154G>A p.Gly52Arg
