# Supplementary material for: Evolutionary origins of the emergent ST796 clone of vancomycin resistant Enterococcus faecium
Source: PeerJ. 2017 Jan 24;5:e2916. doi: 10.7717/peerj.2916 (PMC5267571; doi:10.7717/peerj.2916)
Supplement: Table S4 [file peerj-05-2916-s006.xlsx]

## Sheet: chr_phage-1_subset.txt
Supplementary Table S4
Feature	COUNTER	DESCRIPTION	Ef_04112313871.faa	Ef_11-9295564.faa	Ef_11282884.faa	Ef_32605238.faa	Ef_524685928.faa	Ef_9150823H.faa	Ef_aesops12030.faa	Ef_aesops12035.faa	Ef_aesops12037.faa	Ef_aesops12038.faa	Ef_aesops12041.faa	Ef_aesops12057.faa	Ef_aesops12062.faa	Ef_aesops13004.faa	Ef_aesops13028.faa	Ef_aesops13032.faa	Ef_aesops13034.faa	Ef_aus0002.faa	Ef_aus0003.faa	Ef_aus0004_chr_p1-3.fna.faa	Ef_aus0005.faa	Ef_aus0006.faa	Ef_aus0007.faa	Ef_aus0009.faa	Ef_aus0010.faa	Ef_aus0012.faa	Ef_aus0014.faa	Ef_aus0015.faa	Ef_aus0016.faa	Ef_aus0019.faa	Ef_aus0021.faa	Ef_aus0023.faa	Ef_aus0025.faa	Ef_aus0026.faa	Ef_aus0029.faa	Ef_aus0031.faa	Ef_aus0038.faa	Ef_aus0041.faa	Ef_aus0043.faa	Ef_aus0045.faa	Ef_aus0053.faa	Ef_aus0055.faa	Ef_aus0065.faa	Ef_aus0070.faa	Ef_aus0078.faa	Ef_aus0080.faa	Ef_aus0084.faa
Ef_aus0233_chr_phage-1	3874	hypothetical protein	*	Ef_11-9295564_00726	*	Ef_32605238_00773	*	Ef_9150823H_00953	Ef_aesops12030_00948	*	Ef_aesops12037_01159	Ef_aesops12038_01160	Ef_aesops12041_01019	*	Ef_aesops12062_01016	Ef_aesops13004_00817	Ef_aesops13028_00970	*	*	*	Ef_aus0003_00455	*	*	*	*	Ef_aus0009_00399	*	*	*	*	*	*	*	*	*	*	*	*	*	*	*	*	*	*	*	*	Ef_aus0078_00975	*	*
Ef_aus0233_chr_phage-1	2588	ISEf1 transposase	*	Ef_11-9295564_00725	*	Ef_32605238_00772	*	Ef_9150823H_00952	Ef_aesops12030_00947	*	Ef_aesops12037_01160	Ef_aesops12038_01161	Ef_aesops12041_01020	*	Ef_aesops12062_01015	Ef_aesops13004_00816	Ef_aesops13028_00969	*	*	*	Ef_aus0003_00454	*	*	*	*	Ef_aus0009_00398	*	*	*	*	*	*	*	*	*	*	Ef_aus0029_02195	*	*	*	*	*	*	Ef_aus0055_02270	*	*	*	Ef_aus0080_02625	Ef_aus0084_02726
Ef_aus0233_chr_phage-1	2248	IS16/IS256 transposase	Ef_04112313871_00441	Ef_11-9295564_02804	Ef_11282884_02837	Ef_32605238_02803	Ef_524685928_00641	Ef_9150823H_02898	Ef_aesops12030_02951	Ef_aesops12035_02903	Ef_aesops12037_02902	Ef_aesops12038_02912	Ef_aesops12041_02924	Ef_aesops12057_02809	Ef_aesops12062_02907	Ef_aesops13004_02957	Ef_aesops13028_02857	Ef_aesops13032_02826	Ef_aesops13034_02941	Ef_aus0002_02692	Ef_aus0003_02813	aus0004_chr_p1-3.fna_02731 aus0004_chr_p1-3.fna_02398 aus0004_chr_p1-3.fna_01920	*	Ef_aus0006_02855	Ef_aus0007_02841	*	*	Ef_aus0012_02848	Ef_aus0014_02751	Ef_aus0015_02650	Ef_aus0016_02729	Ef_aus0019_02721	Ef_aus0021_02940	Ef_aus0023_02706	Ef_aus0025_02906	Ef_aus0026_02946	Ef_aus0029_03142	Ef_aus0031_02801	Ef_aus0038_02685	Ef_aus0041_03089	Ef_aus0043_02847	Ef_aus0045_02961	Ef_aus0053_02876	Ef_aus0055_03131	Ef_aus0065_02689	Ef_aus0070_03115	Ef_aus0078_03063	Ef_aus0080_02701	Ef_aus0084_02794
Ef_aus0233_chr_phage-1	2607	cell wall protein	*	*	*	*	*	*	Ef_aesops12030_02697	*	Ef_aesops12037_02675	Ef_aesops12038_02689	Ef_aesops12041_02681	*	Ef_aesops12062_02915	*	Ef_aesops13028_02869	*	*	*	Ef_aus0003_00453	*	*	*	*	Ef_aus0009_00397	*	*	*	*	*	*	*	*	*	*	*	*	*	*	*	*	*	*	*	*	Ef_aus0078_03014	Ef_aus0080_02624	Ef_aus0084_02725
Ef_aus0233_chr_phage-1	2597	hypothetical protein	*	Ef_11-9295564_02622	*	Ef_32605238_02587	*	Ef_9150823H_02632	Ef_aesops12030_02698	*	Ef_aesops12037_02676	Ef_aesops12038_02690	Ef_aesops12041_02682	*	Ef_aesops12062_02728	Ef_aesops13004_02816	Ef_aesops13028_02636	*	*	*	Ef_aus0003_00452	*	*	*	*	Ef_aus0009_00396	*	*	*	*	*	*	*	*	*	*	*	*	*	*	*	*	*	*	*	*	Ef_aus0078_03013	Ef_aus0080_02623	*
Ef_aus0233_chr_phage-1	3980	Thymidine kinase	*	Ef_11-9295564_02621	*	Ef_32605238_02586	*	Ef_9150823H_02633	Ef_aesops12030_02699	*	Ef_aesops12037_02677	Ef_aesops12038_02691	Ef_aesops12041_02683	*	Ef_aesops12062_02729	Ef_aesops13004_02815	Ef_aesops13028_02637	*	*	*	Ef_aus0003_00451	*	*	*	*	Ef_aus0009_00395	*	*	*	*	*	*	*	*	*	*	*	*	*	*	*	*	*	*	*	*	Ef_aus0078_03084	*	*
Ef_aus0233_chr_phage-1	3722	ISEf1 transposase	*	Ef_11-9295564_02620	*	Ef_32605238_02585	*	Ef_9150823H_02634	Ef_aesops12030_02700	*	Ef_aesops12037_02678	Ef_aesops12038_02692	Ef_aesops12041_02684	*	Ef_aesops12062_02730	Ef_aesops13004_02814	Ef_aesops13028_02638	*	*	*	Ef_aus0003_00450	*	*	Ef_aus0006_02862	*	*	*	*	*	*	*	*	*	*	Ef_aus0025_02156	*	*	*	*	*	*	*	*	*	*	*	*	Ef_aus0080_00450	*
Ef_aus0233_chr_phage-1	3981	amino acid permease family protein	*	Ef_11-9295564_02619	*	Ef_32605238_02584	*	Ef_9150823H_02635	Ef_aesops12030_02701	*	Ef_aesops12037_02679	Ef_aesops12038_02693	Ef_aesops12041_02685	*	Ef_aesops12062_02731	Ef_aesops13004_02813	Ef_aesops13028_02639	*	*	*	Ef_aus0003_00449	*	*	*	*	Ef_aus0009_02638	*	*	*	*	*	*	*	*	*	*	*	*	*	*	*	*	*	*	*	*	Ef_aus0078_02836	*	*
Ef_aus0233_chr_phage-1	3982	Glutamate decarboxylase	*	Ef_11-9295564_02618	*	Ef_32605238_02583	*	Ef_9150823H_02636	Ef_aesops12030_02702	*	Ef_aesops12037_02680	Ef_aesops12038_02694	Ef_aesops12041_02686	*	Ef_aesops12062_02732	Ef_aesops13004_02812	Ef_aesops13028_02640	*	*	*	Ef_aus0003_00448	*	*	*	*	Ef_aus0009_02637	*	*	*	*	*	*	*	*	*	*	*	*	*	*	*	*	*	*	*	*	Ef_aus0078_02837	*	*
Ef_aus0233_chr_phage-1	3983	M protein trans-acting positive regulator	*	Ef_11-9295564_02617	*	Ef_32605238_02582	*	Ef_9150823H_02637	Ef_aesops12030_02703	*	Ef_aesops12037_02681	Ef_aesops12038_02695	Ef_aesops12041_02687	*	Ef_aesops12062_02733	Ef_aesops13004_02811	Ef_aesops13028_02641	*	*	*	Ef_aus0003_00447	*	*	*	*	Ef_aus0009_02636	*	*	*	*	*	*	*	*	*	*	*	*	*	*	*	*	*	*	*	*	Ef_aus0078_02838	*	*
Ef_aus0233_chr_phage-1	4018	ParB-like nuclease domain protein	*	*	*	*	*	*	*	*	*	*	*	*	*	Ef_aesops13004_02810	*	*	*	*	*	*	*	*	*	*	*	*	*	*	*	*	*	*	*	*	*	*	*	*	*	*	*	*	*	*	Ef_aus0078_02840	*	*
Ef_aus0233_chr_phage-1	3402	ISEfa8 transposase	*	*	*	*	*	*	*	*	*	*	*	*	*	*	*	*	*	*	*	*	*	*	*	*	*	*	*	*	*	*	*	*	*	*	*	*	*	*	*	*	*	*	*	*	*	*	*
Ef_aus0233_chr_phage-1	2259	ISEfa8 transposase	Ef_04112313871_02968	Ef_11-9295564_02808	Ef_11282884_02841	Ef_32605238_02811	Ef_524685928_03089	Ef_9150823H_02930	Ef_aesops12030_02954	Ef_aesops12035_02905	Ef_aesops12037_02906	Ef_aesops12038_02914	Ef_aesops12041_02929	Ef_aesops12057_02813	Ef_aesops12062_02911	Ef_aesops13004_02966 Ef_aesops13004_02748	Ef_aesops13028_02861	Ef_aesops13032_02832	Ef_aesops13034_02950	Ef_aus0002_02734	Ef_aus0003_02818	aus0004_chr_p1-3.fna_02759 aus0004_chr_p1-3.fna_02254	Ef_aus0005_00652	*	*	Ef_aus0009_02740	Ef_aus0010_02711	Ef_aus0012_02610	Ef_aus0014_02763	Ef_aus0015_02655	Ef_aus0016_02778	Ef_aus0019_02723	Ef_aus0021_02945	Ef_aus0023_01698	Ef_aus0025_02912	Ef_aus0026_02952	Ef_aus0029_03148	Ef_aus0031_01051	Ef_aus0038_01707	Ef_aus0041_03099	Ef_aus0043_02849	Ef_aus0045_02971	Ef_aus0053_02891	Ef_aus0055_03135	Ef_aus0065_02695	Ef_aus0070_03129	Ef_aus0078_03081	Ef_aus0080_02711	Ef_aus0084_01628
Ef_aus0233_chr_phage-1	4026	ISEf1 transposase	*	*	*	*	*	*	*	*	*	*	*	*	*	Ef_aesops13004_02972	*	*	*	*	Ef_aus0003_02841	*	*	*	*	*	*	*	*	*	*	*	*	*	*	*	*	*	*	*	*	*	*	*	*	*	*	*	*
Ef_aus0233_chr_phage-1	3403	ISEfa7 transposase	*	*	*	*	*	*	*	*	*	*	*	*	*	*	*	*	*	*	*	aus0004_chr_p1-3.fna_01809	Ef_aus0005_02459	*	*	*	*	*	*	*	*	*	*	*	*	*	*	*	*	*	*	*	*	*	*	*	*	*	*
Ef_aus0233_chr_phage-1	2955	ISEfa7 transposase	*	Ef_11-9295564_02800	*	Ef_32605238_02798	*	Ef_9150823H_02884	*	*	*	*	*	*	*	Ef_aesops13004_02956	Ef_aesops13028_02853	*	*	*	*	aus0004_chr_p1-3.fna_02756 aus0004_chr_p1-3.fna_01789 aus0004_chr_p1-3.fna_00582	Ef_aus0005_02460	*	*	*	*	*	*	*	*	*	*	*	*	*	*	Ef_aus0031_02798	Ef_aus0038_02681	*	*	*	*	*	*	*	*	*	*
Ef_aus0233_chr_phage-1	3960	sugar isomerase	*	Ef_11-9295564_02369	*	Ef_32605238_02515	*	Ef_9150823H_02399	Ef_aesops12030_02493	*	Ef_aesops12037_02417	Ef_aesops12038_02417	Ef_aesops12041_02386	*	Ef_aesops12062_02454	Ef_aesops13004_02555	Ef_aesops13028_02432	*	*	*	Ef_aus0003_02424	aus0004_chr_p1-3.fna_02755	*	Ef_aus0006_02662	*	Ef_aus0009_02329	*	Ef_aus0012_02712	Ef_aus0014_00761	Ef_aus0015_02567	*	*	Ef_aus0021_02777	Ef_aus0023_02072	Ef_aus0025_02149	Ef_aus0026_02097	*	*	*	*	*	*	*	*	*	*	Ef_aus0078_02461	Ef_aus0080_00457	Ef_aus0084_00833
Ef_aus0233_chr_phage-1	3959	PTS system mannose/fructose/sorbose-specific IIA component	*	Ef_11-9295564_02368	*	Ef_32605238_02514	*	Ef_9150823H_02398	Ef_aesops12030_02492	*	Ef_aesops12037_02416	Ef_aesops12038_02416	Ef_aesops12041_02385	*	Ef_aesops12062_02453	Ef_aesops13004_02556	Ef_aesops13028_02431	*	*	*	Ef_aus0003_02423	aus0004_chr_p1-3.fna_02754	*	Ef_aus0006_02663	*	Ef_aus0009_02330	*	Ef_aus0012_02713	Ef_aus0014_00762	Ef_aus0015_02568	*	*	Ef_aus0021_02778	Ef_aus0023_02073	Ef_aus0025_02150	Ef_aus0026_02098	*	*	*	*	*	*	*	*	*	*	Ef_aus0078_02460	Ef_aus0080_00456	Ef_aus0084_00832
Ef_aus0233_chr_phage-1	3958	PTS system mannose/fructose/sorbose-specific IIB component	*	Ef_11-9295564_02367	*	Ef_32605238_02513	*	Ef_9150823H_02397	Ef_aesops12030_02491	*	Ef_aesops12037_02415	Ef_aesops12038_02415	Ef_aesops12041_02384	*	Ef_aesops12062_02452	Ef_aesops13004_02557	Ef_aesops13028_02430	*	*	*	Ef_aus0003_02422	aus0004_chr_p1-3.fna_02753	*	Ef_aus0006_02664	*	Ef_aus0009_02331	*	Ef_aus0012_02714	Ef_aus0014_00763	Ef_aus0015_02569	*	*	Ef_aus0021_02779	Ef_aus0023_02074	Ef_aus0025_02151	Ef_aus0026_02099	*	*	*	*	*	*	*	*	*	*	Ef_aus0078_02459	Ef_aus0080_00455	Ef_aus0084_00831
Ef_aus0233_chr_phage-1	3957	PTS system mannose/fructose/sorbose-specific IIC component	*	Ef_11-9295564_02366	*	Ef_32605238_02512	*	Ef_9150823H_02396	Ef_aesops12030_02490	*	Ef_aesops12037_02414	Ef_aesops12038_02414	Ef_aesops12041_02383	*	Ef_aesops12062_02451	Ef_aesops13004_02558	Ef_aesops13028_02429	*	*	*	Ef_aus0003_02421	aus0004_chr_p1-3.fna_02752	*	Ef_aus0006_02665	*	Ef_aus0009_02332	Ef_aus0010_02742	Ef_aus0012_02715	Ef_aus0014_00764	Ef_aus0015_02570	*	*	Ef_aus0021_02780	Ef_aus0023_02075	Ef_aus0025_02152	Ef_aus0026_02100	*	*	*	*	*	*	*	*	*	*	Ef_aus0078_02458	Ef_aus0080_00454	Ef_aus0084_00830
Ef_aus0233_chr_phage-1	3956	PTS system mannose/fructose/sorbose-specific IID component	*	Ef_11-9295564_02365	*	Ef_32605238_02511	*	Ef_9150823H_02395	Ef_aesops12030_02489	*	Ef_aesops12037_02413	Ef_aesops12038_02413	Ef_aesops12041_02382	*	Ef_aesops12062_02450	Ef_aesops13004_02559	Ef_aesops13028_02428	*	*	*	Ef_aus0003_02420	aus0004_chr_p1-3.fna_02751	*	Ef_aus0006_02666	*	Ef_aus0009_02333	*	Ef_aus0012_02716	Ef_aus0014_00765	Ef_aus0015_02571	*	*	Ef_aus0021_02781	Ef_aus0023_02076	Ef_aus0025_02153	Ef_aus0026_02101	*	*	*	*	*	*	Ef_aus0053_02885	*	*	*	Ef_aus0078_02457	Ef_aus0080_00453	Ef_aus0084_00829
Ef_aus0233_chr_phage-1	3955	HAD superfamily hydrolase	*	Ef_11-9295564_02364	*	Ef_32605238_02510	*	Ef_9150823H_02394	Ef_aesops12030_02488	*	Ef_aesops12037_02412	Ef_aesops12038_02412	Ef_aesops12041_02381	*	Ef_aesops12062_02449	Ef_aesops13004_02560	Ef_aesops13028_02427	*	*	*	Ef_aus0003_02419	aus0004_chr_p1-3.fna_02750	*	Ef_aus0006_02667	*	Ef_aus0009_02334	*	Ef_aus0012_02717	Ef_aus0014_00766	Ef_aus0015_02572	*	*	Ef_aus0021_02782	Ef_aus0023_02077	Ef_aus0025_02154	Ef_aus0026_02102	*	*	*	*	*	*	Ef_aus0053_02886	*	*	*	Ef_aus0078_02456	Ef_aus0080_00452	Ef_aus0084_00828
Ef_aus0233_chr_phage-1	3954	transcriptional regulator GntR family	*	Ef_11-9295564_02363	*	Ef_32605238_02509	*	Ef_9150823H_02393	Ef_aesops12030_02487	*	Ef_aesops12037_02411	Ef_aesops12038_02411	Ef_aesops12041_02380	*	Ef_aesops12062_02448	Ef_aesops13004_02561	Ef_aesops13028_02426	*	*	*	Ef_aus0003_02418	aus0004_chr_p1-3.fna_02749	*	Ef_aus0006_02668	*	Ef_aus0009_02335	*	Ef_aus0012_02718	Ef_aus0014_00767	Ef_aus0015_02573	*	*	Ef_aus0021_02783	Ef_aus0023_02078	Ef_aus0025_02155	Ef_aus0026_02103	*	*	*	*	*	*	*	*	*	*	Ef_aus0078_02455	Ef_aus0080_00451	Ef_aus0084_00827
Ef_aus0233_chr_phage-1	3663	Integrase core domain protein	*	Ef_11-9295564_02362	*	Ef_32605238_02508	*	Ef_9150823H_02392	Ef_aesops12030_02486	*	Ef_aesops12037_02410	Ef_aesops12038_02410	Ef_aesops12041_02379	*	Ef_aesops12062_02447	Ef_aesops13004_02562	Ef_aesops13028_02425	*	*	*	Ef_aus0003_02417	*	*	*	*	Ef_aus0009_02336	*	*	*	*	*	*	*	*	*	*	Ef_aus0029_02926	*	*	*	*	*	*	Ef_aus0055_02944	*	*	Ef_aus0078_02453	*	*
Ef_aus0233_chr_phage-1	3953	hypothetical protein	*	Ef_11-9295564_02361	*	Ef_32605238_02507	*	Ef_9150823H_02391	Ef_aesops12030_02485	*	Ef_aesops12037_02409	Ef_aesops12038_02409	Ef_aesops12041_02378	*	Ef_aesops12062_02446	Ef_aesops13004_02563	Ef_aesops13028_02424	*	*	Ef_aus0002_02605	Ef_aus0003_02416	aus0004_chr_p1-3.fna_00303	*	Ef_aus0006_02751	Ef_aus0007_02728	Ef_aus0009_02337	*	Ef_aus0012_02812	*	Ef_aus0015_02616	*	Ef_aus0019_02577	Ef_aus0021_02837	Ef_aus0023_02672	Ef_aus0025_02856	Ef_aus0026_02880	*	*	*	*	*	*	*	*	*	*	Ef_aus0078_02864	*	*
Ef_aus0233_chr_phage-1	3952	hypothetical protein	*	Ef_11-9295564_02360	*	Ef_32605238_02506	*	Ef_9150823H_02390	Ef_aesops12030_02484	*	Ef_aesops12037_02408	Ef_aesops12038_02408	Ef_aesops12041_02377	*	Ef_aesops12062_02445	Ef_aesops13004_02564	Ef_aesops13028_02423	*	*	Ef_aus0002_02604	Ef_aus0003_02415	aus0004_chr_p1-3.fna_00304	*	Ef_aus0006_02752	Ef_aus0007_02729	Ef_aus0009_02338	*	Ef_aus0012_02813	*	Ef_aus0015_02615	*	Ef_aus0019_02578	Ef_aus0021_02838	Ef_aus0023_02671	Ef_aus0025_02855	Ef_aus0026_02879	*	*	*	*	*	*	*	*	*	*	Ef_aus0078_02865	*	*
Ef_aus0233_chr_phage-1	3951	hypothetical protein	*	Ef_11-9295564_02358	*	Ef_32605238_02505	*	Ef_9150823H_02388	Ef_aesops12030_02482	*	Ef_aesops12037_02406	Ef_aesops12038_02406	Ef_aesops12041_02375	*	Ef_aesops12062_02443	Ef_aesops13004_02565	Ef_aesops13028_02421	*	*	Ef_aus0002_02603	Ef_aus0003_02413	aus0004_chr_p1-3.fna_00305	*	Ef_aus0006_02753	Ef_aus0007_02730	Ef_aus0009_02340	*	Ef_aus0012_02814	*	Ef_aus0015_02614	*	Ef_aus0019_02579	Ef_aus0021_02839	Ef_aus0023_02670	Ef_aus0025_02854	Ef_aus0026_02878	*	*	*	*	*	*	*	*	*	*	Ef_aus0078_02867	*	*
Ef_aus0233_chr_phage-1	3950	hypothetical protein	*	Ef_11-9295564_02357	*	Ef_32605238_02504	*	Ef_9150823H_02387	Ef_aesops12030_02481	*	Ef_aesops12037_02405	Ef_aesops12038_02405	Ef_aesops12041_02374	*	Ef_aesops12062_02442	Ef_aesops13004_02566	Ef_aesops13028_02420	*	*	Ef_aus0002_02602	Ef_aus0003_02412	aus0004_chr_p1-3.fna_00306	*	Ef_aus0006_02754	Ef_aus0007_02731	Ef_aus0009_02341	*	Ef_aus0012_02815	*	Ef_aus0015_02613	*	Ef_aus0019_02580	Ef_aus0021_02840	Ef_aus0023_02669	Ef_aus0025_02853	Ef_aus0026_02877	*	*	*	*	*	*	*	*	*	*	Ef_aus0078_02868	*	*
Ef_aus0233_chr_phage-1	3949	hypothetical protein	*	Ef_11-9295564_02356	*	Ef_32605238_02503	*	Ef_9150823H_02386	Ef_aesops12030_02480	*	Ef_aesops12037_02404	Ef_aesops12038_02404	Ef_aesops12041_02373	*	Ef_aesops12062_02441	Ef_aesops13004_02567	Ef_aesops13028_02419	*	*	Ef_aus0002_02601	Ef_aus0003_02411	aus0004_chr_p1-3.fna_00307	*	Ef_aus0006_02755	Ef_aus0007_02732	Ef_aus0009_02342	*	Ef_aus0012_02816	*	Ef_aus0015_02612	*	Ef_aus0019_02581	Ef_aus0021_02841	Ef_aus0023_02668	Ef_aus0025_02852	Ef_aus0026_02876	*	*	*	*	*	*	*	*	*	*	Ef_aus0078_02869	*	*
Ef_aus0233_chr_phage-1	3948	hypothetical protein	*	Ef_11-9295564_02355	*	Ef_32605238_02502	*	Ef_9150823H_02385	Ef_aesops12030_02479	*	Ef_aesops12037_02403	Ef_aesops12038_02403	Ef_aesops12041_02372	*	Ef_aesops12062_02440	Ef_aesops13004_02568	Ef_aesops13028_02418	*	*	Ef_aus0002_02600	Ef_aus0003_02410	aus0004_chr_p1-3.fna_00308	*	Ef_aus0006_02756	Ef_aus0007_02733	Ef_aus0009_02343	*	Ef_aus0012_02852	*	Ef_aus0015_02611	*	Ef_aus0019_02582	Ef_aus0021_02842	Ef_aus0023_02667	Ef_aus0025_02851	Ef_aus0026_02875	*	*	*	*	*	*	*	*	*	*	Ef_aus0078_02870	*	*
Ef_aus0233_chr_phage-1	3947	hypothetical protein	*	Ef_11-9295564_02354	*	*	*	Ef_9150823H_02384	Ef_aesops12030_02478	*	Ef_aesops12037_02402	Ef_aesops12038_02402	Ef_aesops12041_02371	*	Ef_aesops12062_02439	Ef_aesops13004_02569	Ef_aesops13028_02417	*	*	*	Ef_aus0003_02409	*	*	*	*	Ef_aus0009_02344	*	*	*	*	*	*	*	*	*	*	*	*	*	*	*	*	*	*	*	*	Ef_aus0078_02871	*	*
Ef_aus0233_chr_phage-1	3946	Superfamily II helicase	*	Ef_11-9295564_02353	*	Ef_32605238_02614	*	Ef_9150823H_02383	Ef_aesops12030_02477	*	Ef_aesops12037_02401	Ef_aesops12038_02401	Ef_aesops12041_02370	*	Ef_aesops12062_02438	Ef_aesops13004_02570	Ef_aesops13028_02416	*	*	*	Ef_aus0003_02408	*	*	*	*	Ef_aus0009_02345	*	*	*	*	*	*	*	*	*	*	*	*	*	*	*	*	*	*	*	*	Ef_aus0078_02809	*	*
Ef_aus0233_chr_phage-1	3945	hypothetical protein	*	Ef_11-9295564_02352	*	Ef_32605238_02615	*	Ef_9150823H_02382	Ef_aesops12030_02476	*	Ef_aesops12037_02400	Ef_aesops12038_02400	Ef_aesops12041_02369	*	Ef_aesops12062_02437	Ef_aesops13004_02571	Ef_aesops13028_02415	*	*	*	Ef_aus0003_02407	*	*	*	*	Ef_aus0009_02346	*	*	*	*	*	*	*	*	*	*	*	*	*	*	*	*	*	*	*	*	Ef_aus0078_02810	*	*
Ef_aus0233_chr_phage-1	3944	hypothetical protein	*	Ef_11-9295564_02351	*	Ef_32605238_02616	*	Ef_9150823H_02381	Ef_aesops12030_02475	*	Ef_aesops12037_02399	Ef_aesops12038_02399	Ef_aesops12041_02368	*	Ef_aesops12062_02436	Ef_aesops13004_02572	Ef_aesops13028_02414	*	*	*	Ef_aus0003_02406	*	*	*	*	Ef_aus0009_02347	*	*	*	*	*	*	*	*	*	*	*	*	*	*	*	*	*	*	*	*	Ef_aus0078_02811	*	*
Ef_aus0233_chr_phage-1	3943	resolvase family site-specific recombinase	*	Ef_11-9295564_02350	*	Ef_32605238_02617	*	Ef_9150823H_02380	Ef_aesops12030_02474	*	Ef_aesops12037_02398	Ef_aesops12038_02398	Ef_aesops12041_02367	*	Ef_aesops12062_02435	Ef_aesops13004_02573	Ef_aesops13028_02413	*	*	*	Ef_aus0003_02405	*	*	*	*	Ef_aus0009_02348	*	*	*	*	*	*	*	*	*	*	*	*	*	*	*	*	*	*	*	*	Ef_aus0078_02812	*	*
Ef_aus0233_chr_phage-1	3942	resolvase family site-specific recombinase	*	Ef_11-9295564_02349	*	Ef_32605238_02618	*	Ef_9150823H_02379	Ef_aesops12030_02473	*	Ef_aesops12037_02397	Ef_aesops12038_02397	Ef_aesops12041_02366	*	Ef_aesops12062_02434	Ef_aesops13004_02574	Ef_aesops13028_02412	*	*	*	Ef_aus0003_02404	*	*	*	*	Ef_aus0009_02349	*	*	*	*	*	*	*	*	*	*	*	*	*	*	*	*	*	*	*	*	Ef_aus0078_02813	*	*
Ef_aus0233_chr_phage-1	3941	hypothetical protein	*	Ef_11-9295564_02348	*	Ef_32605238_02619	*	Ef_9150823H_02378	Ef_aesops12030_02472	*	Ef_aesops12037_02396	Ef_aesops12038_02396	Ef_aesops12041_02365	*	Ef_aesops12062_02433	Ef_aesops13004_02575	Ef_aesops13028_02411	*	*	*	Ef_aus0003_02403	*	*	*	*	Ef_aus0009_02350	*	*	*	*	*	*	*	*	*	*	*	*	*	*	*	*	*	*	*	*	Ef_aus0078_02814	*	*
Ef_aus0233_chr_phage-1	2259	ISEfa8 transposase	Ef_04112313871_02968	Ef_11-9295564_02808	Ef_11282884_02841	Ef_32605238_02811	Ef_524685928_03089	Ef_9150823H_02930	Ef_aesops12030_02954	Ef_aesops12035_02905	Ef_aesops12037_02906	Ef_aesops12038_02914	Ef_aesops12041_02929	Ef_aesops12057_02813	Ef_aesops12062_02911	Ef_aesops13004_02966 Ef_aesops13004_02748	Ef_aesops13028_02861	Ef_aesops13032_02832	Ef_aesops13034_02950	Ef_aus0002_02734	Ef_aus0003_02818	aus0004_chr_p1-3.fna_02759 aus0004_chr_p1-3.fna_02254	Ef_aus0005_00652	*	*	Ef_aus0009_02740	Ef_aus0010_02711	Ef_aus0012_02610	Ef_aus0014_02763	Ef_aus0015_02655	Ef_aus0016_02778	Ef_aus0019_02723	Ef_aus0021_02945	Ef_aus0023_01698	Ef_aus0025_02912	Ef_aus0026_02952	Ef_aus0029_03148	Ef_aus0031_01051	Ef_aus0038_01707	Ef_aus0041_03099	Ef_aus0043_02849	Ef_aus0045_02971	Ef_aus0053_02891	Ef_aus0055_03135	Ef_aus0065_02695	Ef_aus0070_03129	Ef_aus0078_03081	Ef_aus0080_02711	Ef_aus0084_01628
Ef_aus0233_chr_phage-1	2957	integrase core domain protein	Ef_04112313871_02969	Ef_11-9295564_02807	Ef_11282884_02840	Ef_32605238_02810	Ef_524685928_03090	Ef_9150823H_02929	Ef_aesops12030_02953	Ef_aesops12035_02906	Ef_aesops12037_02907	Ef_aesops12038_02913	Ef_aesops12041_02928	Ef_aesops12057_02814	Ef_aesops12062_02910	Ef_aesops13004_02967	Ef_aesops13028_02860	Ef_aesops13032_02833	Ef_aesops13034_02951	*	Ef_aus0003_02817	aus0004_chr_p1-3.fna_02255	*	Ef_aus0006_02874	Ef_aus0007_02857	Ef_aus0009_02739	Ef_aus0010_02710	*	*	Ef_aus0015_02656	*	Ef_aus0019_02724	Ef_aus0021_02946	Ef_aus0023_01699	*	*	Ef_aus0029_03149	Ef_aus0031_01050	Ef_aus0038_01708	Ef_aus0041_03100	Ef_aus0043_02848	Ef_aus0045_02972	Ef_aus0053_02890	Ef_aus0055_03136	Ef_aus0065_02696	Ef_aus0070_03130	Ef_aus0078_03082	*	*
Ef_aus0233_chr_phage-1	3723	hypothetical protein	Ef_04112313871_02381	Ef_11-9295564_01789	Ef_11282884_01124	Ef_32605238_01773	Ef_524685928_02403	Ef_9150823H_01945	Ef_aesops12030_02000	*	Ef_aesops12037_01915	Ef_aesops12038_01914	Ef_aesops12041_01836	*	Ef_aesops12062_01933	Ef_aesops13004_02037	Ef_aesops13028_01885	*	*	*	Ef_aus0003_01757	*	*	*	*	Ef_aus0009_01510	*	*	*	*	*	*	*	*	*	*	*	Ef_aus0031_01360	Ef_aus0038_01251	*	*	*	*	*	Ef_aus0065_01074	*	Ef_aus0078_03044	*	*
Ef_aus0233_chr_phage-1	3724	hypothetical protein	Ef_04112313871_02380	Ef_11-9295564_01790	Ef_11282884_01123	Ef_32605238_01774	Ef_524685928_02402	Ef_9150823H_01946	Ef_aesops12030_01999	*	Ef_aesops12037_01916	Ef_aesops12038_01913	Ef_aesops12041_01835	*	Ef_aesops12062_01932	Ef_aesops13004_02038	Ef_aesops13028_01884	*	*	*	Ef_aus0003_01756	*	*	*	Ef_aus0007_02900	Ef_aus0009_01509	*	*	*	*	*	*	*	*	*	*	*	Ef_aus0031_01359	Ef_aus0038_01250	*	*	*	*	*	Ef_aus0065_01073	*	Ef_aus0078_03045	*	*
Ef_aus0233_chr_phage-1	3939	type I restriction-modification system M subunit	Ef_04112313871_02379	Ef_11-9295564_01791	Ef_11282884_01122	Ef_32605238_01775	Ef_524685928_02401	Ef_9150823H_01947	Ef_aesops12030_01998	*	Ef_aesops12037_01917	Ef_aesops12038_01912	Ef_aesops12041_01834	*	Ef_aesops12062_01931	Ef_aesops13004_02039	Ef_aesops13028_01883	*	*	*	Ef_aus0003_01755	*	*	*	*	Ef_aus0009_01508	*	*	*	*	*	*	*	*	*	*	*	Ef_aus0031_01358	Ef_aus0038_01249	*	*	*	*	*	Ef_aus0065_01072	*	*	*	*
Ef_aus0233_chr_phage-1	3725	transcriptional antiterminator bglG:Sigma-54 factor	Ef_04112313871_02378	Ef_11-9295564_01792	Ef_11282884_01121	Ef_32605238_01776	Ef_524685928_02400	Ef_9150823H_01948	Ef_aesops12030_01997	*	Ef_aesops12037_01918	Ef_aesops12038_01911	Ef_aesops12041_01833	*	Ef_aesops12062_01930	Ef_aesops13004_02040	Ef_aesops13028_01882	*	*	*	Ef_aus0003_01754	*	*	*	*	Ef_aus0009_01507	*	*	*	*	*	*	*	*	*	*	*	Ef_aus0031_01357	Ef_aus0038_01248	*	*	*	*	*	Ef_aus0065_01071	*	Ef_aus0078_01806	*	*
Ef_aus0233_chr_phage-1	3726	PTS system mannose-specific IIAB component	Ef_04112313871_02377	Ef_11-9295564_01793	Ef_11282884_01120	Ef_32605238_01777	Ef_524685928_02399	Ef_9150823H_01949	Ef_aesops12030_01996	*	Ef_aesops12037_01919	Ef_aesops12038_01910	Ef_aesops12041_01832	*	Ef_aesops12062_01929	Ef_aesops13004_02041	Ef_aesops13028_01881	*	*	*	Ef_aus0003_01753	*	*	*	*	Ef_aus0009_01506	*	*	*	*	*	*	*	*	*	*	*	Ef_aus0031_01356	Ef_aus0038_01247	*	*	*	*	*	Ef_aus0065_01070	*	Ef_aus0078_01807	*	*
Ef_aus0233_chr_phage-1	3727	PTS system mannose-specific IIC component	Ef_04112313871_02376	Ef_11-9295564_01794	Ef_11282884_01119	Ef_32605238_01778	Ef_524685928_02398	Ef_9150823H_01950	Ef_aesops12030_01995	*	Ef_aesops12037_01920	Ef_aesops12038_01909	Ef_aesops12041_01831	*	Ef_aesops12062_01928	Ef_aesops13004_02042	Ef_aesops13028_01880	*	*	*	Ef_aus0003_01752	*	*	*	*	Ef_aus0009_01505	*	*	*	*	*	*	*	*	*	*	*	Ef_aus0031_01355	Ef_aus0038_01246	*	*	*	*	*	Ef_aus0065_01069	*	Ef_aus0078_01808	*	*
Ef_aus0233_chr_phage-1	3728	PTS system mannose/fructose/sorbose-specific IID component	Ef_04112313871_02375	Ef_11-9295564_01795	Ef_11282884_01118	Ef_32605238_01779	Ef_524685928_02397	Ef_9150823H_01951	Ef_aesops12030_01994	*	Ef_aesops12037_01921	Ef_aesops12038_01908	Ef_aesops12041_01830	*	Ef_aesops12062_01927	Ef_aesops13004_02043	Ef_aesops13028_01879	*	*	*	Ef_aus0003_01751	*	*	*	*	Ef_aus0009_01504	*	*	*	*	*	*	*	*	*	*	*	Ef_aus0031_01354	Ef_aus0038_01245	*	*	*	*	*	Ef_aus0065_01068	*	Ef_aus0078_01809	*	*
Ef_aus0233_chr_phage-1	3729	PTS system mannose/fructose/sorbose-specific IIA component	Ef_04112313871_02374	Ef_11-9295564_01796	Ef_11282884_01117	Ef_32605238_01780	Ef_524685928_02396	Ef_9150823H_01952	Ef_aesops12030_01993	*	Ef_aesops12037_01922	Ef_aesops12038_01907	Ef_aesops12041_01829	*	Ef_aesops12062_01926	Ef_aesops13004_02044	Ef_aesops13028_01878	*	*	*	Ef_aus0003_01750	*	*	*	*	Ef_aus0009_01503	*	*	*	*	*	*	*	*	*	*	*	Ef_aus0031_01353	Ef_aus0038_01244	*	*	*	*	*	Ef_aus0065_01067	*	Ef_aus0078_01810	*	*
Ef_aus0233_chr_phage-1	3730	hypothetical protein	Ef_04112313871_02373	Ef_11-9295564_01797	Ef_11282884_01116	Ef_32605238_01781	Ef_524685928_02395	Ef_9150823H_01953	Ef_aesops12030_01992	*	Ef_aesops12037_01923	Ef_aesops12038_01906	Ef_aesops12041_01828	*	Ef_aesops12062_01925	Ef_aesops13004_02045	Ef_aesops13028_01877	*	*	*	Ef_aus0003_01749	*	*	*	*	Ef_aus0009_01502	*	*	*	*	*	*	*	*	*	*	*	Ef_aus0031_01352	Ef_aus0038_01243	*	*	*	*	*	Ef_aus0065_01066	*	Ef_aus0078_01811	*	*
Ef_aus0233_chr_phage-1	3731	fructokinase	Ef_04112313871_02372	Ef_11-9295564_01798	Ef_11282884_01115	Ef_32605238_01782	Ef_524685928_02394	Ef_9150823H_01954	Ef_aesops12030_01991	*	Ef_aesops12037_01924	Ef_aesops12038_01905	Ef_aesops12041_01827	*	Ef_aesops12062_01924	Ef_aesops13004_02046	Ef_aesops13028_01876	*	*	*	Ef_aus0003_01748	*	*	*	*	Ef_aus0009_01501	*	*	*	*	*	*	*	*	*	*	*	Ef_aus0031_01351	Ef_aus0038_01242	*	*	*	*	*	Ef_aus0065_01065	*	Ef_aus0078_01812	*	*
Ef_aus0233_chr_phage-1	3732	hypothetical protein	Ef_04112313871_02786	Ef_11-9295564_01799	*	Ef_32605238_01783	Ef_524685928_02810	Ef_9150823H_01955	Ef_aesops12030_01990	Ef_aesops12035_00524	Ef_aesops12037_01925	Ef_aesops12038_01904	Ef_aesops12041_01826	*	Ef_aesops12062_01923	Ef_aesops13004_02047	Ef_aesops13028_01875	*	Ef_aesops13034_00524	Ef_aus0002_00930	Ef_aus0003_01747	aus0004_chr_p1-3.fna_00283	*	Ef_aus0006_01026	Ef_aus0007_01030	Ef_aus0009_01500	Ef_aus0010_00313	Ef_aus0012_00951	Ef_aus0014_02240	Ef_aus0015_01040	*	Ef_aus0019_00868	Ef_aus0021_02943	Ef_aus0023_02025	Ef_aus0025_02078	Ef_aus0026_02050	*	Ef_aus0031_02643	Ef_aus0038_02554	*	*	*	Ef_aus0053_02900	*	Ef_aus0065_02407	*	Ef_aus0078_01813	*	*
Ef_aus0233_chr_phage-1	3733	hypothetical protein	Ef_04112313871_02787	Ef_11-9295564_01800	*	Ef_32605238_01784	Ef_524685928_02811	Ef_9150823H_01956	Ef_aesops12030_01989	Ef_aesops12035_00523	Ef_aesops12037_01926	Ef_aesops12038_01903	Ef_aesops12041_01825	*	Ef_aesops12062_01922	Ef_aesops13004_02048	Ef_aesops13028_01874	*	Ef_aesops13034_00523	Ef_aus0002_00931	Ef_aus0003_01746	aus0004_chr_p1-3.fna_00284	*	Ef_aus0006_01025	Ef_aus0007_01031	Ef_aus0009_01499	Ef_aus0010_00312	Ef_aus0012_00952	Ef_aus0014_02239	Ef_aus0015_01041	*	Ef_aus0019_00869	Ef_aus0021_02944	Ef_aus0023_02024	Ef_aus0025_02077	Ef_aus0026_02049	*	Ef_aus0031_02644	Ef_aus0038_02555	*	*	*	Ef_aus0053_02901	*	Ef_aus0065_02408	*	Ef_aus0078_01814	*	*
Ef_aus0233_chr_phage-1	3734	2-dehydropantoate 2-reductase	Ef_04112313871_02788	Ef_11-9295564_01801	*	Ef_32605238_01785	Ef_524685928_02812	Ef_9150823H_01957	Ef_aesops12030_01988	Ef_aesops12035_00522	Ef_aesops12037_01927	Ef_aesops12038_01902	Ef_aesops12041_01824	*	Ef_aesops12062_01921	Ef_aesops13004_02049	Ef_aesops13028_01873	*	Ef_aesops13034_00522	Ef_aus0002_00932	Ef_aus0003_01745	aus0004_chr_p1-3.fna_00285	*	Ef_aus0006_01024	Ef_aus0007_01032	Ef_aus0009_01498	Ef_aus0010_00311	Ef_aus0012_00953	Ef_aus0014_02238	Ef_aus0015_01042	Ef_aus0016_02783	Ef_aus0019_00870	Ef_aus0021_02811	Ef_aus0023_02023	Ef_aus0025_02076	Ef_aus0026_02048	*	Ef_aus0031_02645	Ef_aus0038_02556	*	*	*	*	*	Ef_aus0065_02409	*	Ef_aus0078_01815	*	*
Ef_aus0233_chr_phage-1	3735	membrane protein	Ef_04112313871_02789	Ef_11-9295564_01802	*	Ef_32605238_01786	Ef_524685928_02813	Ef_9150823H_01958	Ef_aesops12030_01987	Ef_aesops12035_00521	Ef_aesops12037_01928	Ef_aesops12038_01901	Ef_aesops12041_01823	*	Ef_aesops12062_01920	Ef_aesops13004_02050	Ef_aesops13028_01872	*	Ef_aesops13034_00521	Ef_aus0002_00933	Ef_aus0003_01744	aus0004_chr_p1-3.fna_00286	*	Ef_aus0006_01023	Ef_aus0007_01033	Ef_aus0009_01497	Ef_aus0010_00310	Ef_aus0012_00954	Ef_aus0014_02237	Ef_aus0015_01043	*	Ef_aus0019_00871	Ef_aus0021_02812	Ef_aus0023_02022	Ef_aus0025_02075	Ef_aus0026_02047	*	Ef_aus0031_02646	Ef_aus0038_02557	*	*	*	*	*	Ef_aus0065_02410	*	Ef_aus0078_01816	*	*
Ef_aus0233_chr_phage-2	2309	site-specific tyrosine recombinase XerC-family protein	Ef_04112313871_00840	Ef_11-9295564_00607	Ef_11282884_00635	Ef_32605238_00624	Ef_524685928_01017	Ef_9150823H_00583	Ef_aesops12030_00655	Ef_aesops12035_00759	Ef_aesops12037_00556	Ef_aesops12038_00644	Ef_aesops12041_00533	Ef_aesops12057_00667	Ef_aesops12062_00653	Ef_aesops13004_00659	Ef_aesops13028_00505	Ef_aesops13032_00632	Ef_aesops13034_00759	Ef_aus0002_00622	Ef_aus0003_01604	aus0004_chr_p1-3.fna_01492 aus0004_chr_p1-3.fna_00797	*	Ef_aus0006_00659	Ef_aus0007_00762	*	*	Ef_aus0012_00271	Ef_aus0014_00055	Ef_aus0015_00396	Ef_aus0016_00140	Ef_aus0019_02389	Ef_aus0021_00759	Ef_aus0023_00379	Ef_aus0025_00735	Ef_aus0026_00367	Ef_aus0029_00048	Ef_aus0031_00050	Ef_aus0038_00144	Ef_aus0041_01439	Ef_aus0043_00572	Ef_aus0045_01119	Ef_aus0053_00568	Ef_aus0055_00048	Ef_aus0065_00203	Ef_aus0070_01049	Ef_aus0078_00865	Ef_aus0080_00061	Ef_aus0084_00295
Ef_aus0233_chr_phage-2	2270	hypothetical protein	Ef_04112313871_00839	Ef_11-9295564_00606	Ef_11282884_00634	Ef_32605238_00625	Ef_524685928_01018	Ef_9150823H_00582	Ef_aesops12030_00656	Ef_aesops12035_00760	Ef_aesops12037_00555	Ef_aesops12038_00643	Ef_aesops12041_00532	Ef_aesops12057_00668	Ef_aesops12062_00652	Ef_aesops13004_00658	Ef_aesops13028_00504	Ef_aesops13032_00631	Ef_aesops13034_00760	Ef_aus0002_00621	Ef_aus0003_01603	aus0004_chr_p1-3.fna_01491 aus0004_chr_p1-3.fna_00798	*	Ef_aus0006_00660	Ef_aus0007_00763	*	*	Ef_aus0012_00272	Ef_aus0014_00054	Ef_aus0015_00397	Ef_aus0016_00141	Ef_aus0019_02390	*	Ef_aus0023_00378	*	*	Ef_aus0029_00047	Ef_aus0031_00049	*	Ef_aus0041_01440	Ef_aus0043_00573	*	Ef_aus0053_00567	Ef_aus0055_00047	Ef_aus0065_00204	Ef_aus0070_01050	Ef_aus0078_00864	Ef_aus0080_00062	Ef_aus0084_00294
Ef_aus0233_chr_phage-2	2269	hypothetical protein	Ef_04112313871_00838	Ef_11-9295564_00605	Ef_11282884_00633	Ef_32605238_00626	Ef_524685928_01019	Ef_9150823H_00581	Ef_aesops12030_00657	Ef_aesops12035_00761	Ef_aesops12037_00554	Ef_aesops12038_00642	Ef_aesops12041_00531	Ef_aesops12057_00669	Ef_aesops12062_00651	Ef_aesops13004_00657	Ef_aesops13028_00503	Ef_aesops13032_00630	Ef_aesops13034_00761	Ef_aus0002_00620	Ef_aus0003_01994	aus0004_chr_p1-3.fna_01490 aus0004_chr_p1-3.fna_00799	*	Ef_aus0006_00661	Ef_aus0007_00764	*	*	Ef_aus0012_00273	Ef_aus0014_00053	Ef_aus0015_00398	Ef_aus0016_00142	Ef_aus0019_02391	*	Ef_aus0023_00377	*	*	Ef_aus0029_00046	Ef_aus0031_00048	*	Ef_aus0041_01441	Ef_aus0043_00574	*	Ef_aus0053_00566	Ef_aus0055_00046	Ef_aus0065_00205	Ef_aus0070_01051	Ef_aus0078_00863	Ef_aus0080_00063	Ef_aus0084_00293
Ef_aus0233_chr_phage-2	2258	hypothetical protein	Ef_04112313871_00837	Ef_11-9295564_00604	Ef_11282884_00632	Ef_32605238_00627	Ef_524685928_01020	Ef_9150823H_00580	Ef_aesops12030_00658	Ef_aesops12035_00762	Ef_aesops12037_00553	Ef_aesops12038_00641	Ef_aesops12041_00530	Ef_aesops12057_00670	Ef_aesops12062_00650	Ef_aesops13004_00656	Ef_aesops13028_00502	Ef_aesops13032_00629	Ef_aesops13034_00762	Ef_aus0002_00619	Ef_aus0003_01993	aus0004_chr_p1-3.fna_01489 aus0004_chr_p1-3.fna_00800	*	Ef_aus0006_00662	Ef_aus0007_00765	*	*	Ef_aus0012_00274	Ef_aus0014_00052	Ef_aus0015_00399	Ef_aus0016_00143	Ef_aus0019_02392	*	Ef_aus0023_00376	*	*	Ef_aus0029_00045	Ef_aus0031_00047	*	Ef_aus0041_01442	Ef_aus0043_00575	*	Ef_aus0053_00565	Ef_aus0055_00045	Ef_aus0065_00206	Ef_aus0070_01052	Ef_aus0078_00862	Ef_aus0080_00064	Ef_aus0084_00292
Ef_aus0233_chr_phage-2	2810	hypothetical protein	*	Ef_11-9295564_00603	Ef_11282884_00631	Ef_32605238_00628	Ef_524685928_01021	Ef_9150823H_00579	Ef_aesops12030_00659	Ef_aesops12035_00763	Ef_aesops12037_00552	Ef_aesops12038_00640	Ef_aesops12041_00529	Ef_aesops12057_00671	Ef_aesops12062_00649	Ef_aesops13004_00655	Ef_aesops13028_00501	Ef_aesops13032_00628	Ef_aesops13034_00763	Ef_aus0002_00618	Ef_aus0003_01992	aus0004_chr_p1-3.fna_01488 aus0004_chr_p1-3.fna_00801	*	Ef_aus0006_00663	Ef_aus0007_00766	*	*	Ef_aus0012_00275	Ef_aus0014_00051	Ef_aus0015_00400	Ef_aus0016_00144	Ef_aus0019_02393	*	Ef_aus0023_00375	*	*	Ef_aus0029_00044	Ef_aus0031_00046	*	Ef_aus0041_01443	Ef_aus0043_00576	*	Ef_aus0053_00564	Ef_aus0055_00044	Ef_aus0065_00207	Ef_aus0070_01053	Ef_aus0078_00861	Ef_aus0080_00065	Ef_aus0084_00291
Ef_aus0233_chr_phage-2	2215	hypothetical protein	Ef_04112313871_02097	Ef_11-9295564_00602	Ef_11282884_01927 Ef_11282884_00630	Ef_32605238_00629	Ef_524685928_01964	Ef_9150823H_00578	Ef_aesops12030_00660	Ef_aesops12035_00764	Ef_aesops12037_00551	Ef_aesops12038_00639	Ef_aesops12041_00528	Ef_aesops12057_00672	Ef_aesops12062_00648	Ef_aesops13004_00654	Ef_aesops13028_00500	Ef_aesops13032_00627	Ef_aesops13034_00764	Ef_aus0002_00617	Ef_aus0003_01991	aus0004_chr_p1-3.fna_02455 aus0004_chr_p1-3.fna_01486 aus0004_chr_p1-3.fna_00803	*	Ef_aus0006_02898	Ef_aus0007_02274 Ef_aus0007_00767	*	*	Ef_aus0012_00276	Ef_aus0014_00050	Ef_aus0015_00401	Ef_aus0016_00145	Ef_aus0019_02394 Ef_aus0019_02175	*	Ef_aus0023_00374	*	*	Ef_aus0029_00043	Ef_aus0031_00045	Ef_aus0038_01971	Ef_aus0041_01444	Ef_aus0043_00577	*	Ef_aus0053_00563	Ef_aus0055_00043	Ef_aus0065_02718	Ef_aus0070_01054	Ef_aus0078_00860	Ef_aus0080_00066	Ef_aus0084_00290
Ef_aus0233_chr_phage-2	2216	helix-turn-helix domain-containing protein	Ef_04112313871_02096	Ef_11-9295564_00601	Ef_11282884_00629	Ef_32605238_00630	Ef_524685928_02697	Ef_9150823H_00577	Ef_aesops12030_00661	Ef_aesops12035_00765	Ef_aesops12037_00550	Ef_aesops12038_00638	Ef_aesops12041_00527	Ef_aesops12057_00673	Ef_aesops12062_00647	Ef_aesops13004_00653	Ef_aesops13028_00499	Ef_aesops13032_00626	Ef_aesops13034_00765	Ef_aus0002_00616	Ef_aus0003_01990	aus0004_chr_p1-3.fna_01485 aus0004_chr_p1-3.fna_00804	*	Ef_aus0006_02856	*	*	*	Ef_aus0012_00277	Ef_aus0014_00049	Ef_aus0015_00402	Ef_aus0016_00146	Ef_aus0019_02395	*	Ef_aus0023_00373	*	*	Ef_aus0029_00042	Ef_aus0031_00044	*	Ef_aus0041_01445	Ef_aus0043_00578	*	Ef_aus0053_00562	Ef_aus0055_00042	Ef_aus0065_02690	Ef_aus0070_01055	Ef_aus0078_00859	Ef_aus0080_00067	Ef_aus0084_00289
Ef_aus0233_chr_phage-2	1937	toxin-antitoxin system toxin component Bro family	Ef_04112313871_02095	Ef_11-9295564_00600	Ef_11282884_00628	Ef_32605238_00631	Ef_524685928_02698	Ef_9150823H_00576	Ef_aesops12030_00662	Ef_aesops12035_00766	Ef_aesops12037_00549	Ef_aesops12038_00637	Ef_aesops12041_00526	Ef_aesops12057_00674	Ef_aesops12062_00646	Ef_aesops13004_00652	Ef_aesops13028_00498	Ef_aesops13032_00625	Ef_aesops13034_00766	Ef_aus0002_00615	Ef_aus0003_01989	aus0004_chr_p1-3.fna_01484 aus0004_chr_p1-3.fna_00805	*	Ef_aus0006_02857	*	*	*	Ef_aus0012_00278	Ef_aus0014_00048	Ef_aus0015_00403	Ef_aus0016_00147	Ef_aus0019_02396	Ef_aus0021_00763	Ef_aus0023_00372	Ef_aus0025_00731	Ef_aus0026_00363	Ef_aus0029_00041	Ef_aus0031_00043	Ef_aus0038_00140	Ef_aus0041_01446	Ef_aus0043_00579	Ef_aus0045_01123	Ef_aus0053_00561	Ef_aus0055_00041	Ef_aus0065_02691	Ef_aus0070_01056	Ef_aus0078_00858	Ef_aus0080_00068	Ef_aus0084_00288
Ef_aus0233_chr_phage-2	1938	Helix-turn-helix domain protein	Ef_04112313871_02609 Ef_04112313871_02094	Ef_11-9295564_00599	Ef_11282884_01933 Ef_11282884_00627	Ef_32605238_00632	Ef_524685928_02699 Ef_524685928_01970	Ef_9150823H_00575	Ef_aesops12030_00663	Ef_aesops12035_00767	Ef_aesops12037_00548	Ef_aesops12038_00636	Ef_aesops12041_00525	Ef_aesops12057_00675	Ef_aesops12062_00645	Ef_aesops13004_00651	Ef_aesops13028_00497	Ef_aesops13032_00624	Ef_aesops13034_00767	Ef_aus0002_00614	Ef_aus0003_01988	aus0004_chr_p1-3.fna_02449 aus0004_chr_p1-3.fna_01483 aus0004_chr_p1-3.fna_00806	*	*	Ef_aus0007_02280	*	*	Ef_aus0012_00279	Ef_aus0014_00047	Ef_aus0015_00404	Ef_aus0016_00148	Ef_aus0019_02397	Ef_aus0021_00764	Ef_aus0023_00371	Ef_aus0025_00730	Ef_aus0026_00362	Ef_aus0029_00040	Ef_aus0031_00042	Ef_aus0038_01965 Ef_aus0038_00139	Ef_aus0041_01447	Ef_aus0043_00580	Ef_aus0045_01124	Ef_aus0053_00560	Ef_aus0055_00040	*	Ef_aus0070_01057	Ef_aus0078_00857	Ef_aus0080_00069	Ef_aus0084_00287
Ef_aus0233_chr_phage-2	1939	hypothetical protein	Ef_04112313871_02093	Ef_11-9295564_00598	Ef_11282884_00626	Ef_32605238_00633	Ef_524685928_02700	Ef_9150823H_00574	Ef_aesops12030_00664	Ef_aesops12035_00768	Ef_aesops12037_00547	Ef_aesops12038_00635	Ef_aesops12041_00524	Ef_aesops12057_00676	Ef_aesops12062_00644	Ef_aesops13004_00650	Ef_aesops13028_00496	Ef_aesops13032_00623	Ef_aesops13034_00768	Ef_aus0002_00613	Ef_aus0003_01987	aus0004_chr_p1-3.fna_01482 aus0004_chr_p1-3.fna_00807	*	Ef_aus0006_02770	*	*	*	Ef_aus0012_00280	Ef_aus0014_00046	Ef_aus0015_00405	Ef_aus0016_00149	Ef_aus0019_02398	Ef_aus0021_00765	Ef_aus0023_00370	Ef_aus0025_00729	Ef_aus0026_00361	Ef_aus0029_00039	Ef_aus0031_00041	*	Ef_aus0041_01448	Ef_aus0043_00581	Ef_aus0045_01125	Ef_aus0053_00559	Ef_aus0055_00039	Ef_aus0065_02673	Ef_aus0070_01058	Ef_aus0078_00856	Ef_aus0080_00070	Ef_aus0084_00286
Ef_aus0233_chr_phage-2	1940	hypothetical protein	Ef_04112313871_02092	Ef_11-9295564_00597	Ef_11282884_00625	Ef_32605238_00634	Ef_524685928_02701	Ef_9150823H_00573	Ef_aesops12030_00665	Ef_aesops12035_00769	Ef_aesops12037_00546	Ef_aesops12038_00634	Ef_aesops12041_00523	Ef_aesops12057_00677	Ef_aesops12062_00643	Ef_aesops13004_00649	Ef_aesops13028_00495	Ef_aesops13032_00622	Ef_aesops13034_00769	Ef_aus0002_00612	Ef_aus0003_01986	aus0004_chr_p1-3.fna_01481 aus0004_chr_p1-3.fna_00808	*	Ef_aus0006_02769	*	*	*	Ef_aus0012_00281	Ef_aus0014_00045	Ef_aus0015_00406	Ef_aus0016_00150	Ef_aus0019_02399	*	Ef_aus0023_00369	*	*	Ef_aus0029_00038	Ef_aus0031_00040	Ef_aus0038_01963	Ef_aus0041_01449	Ef_aus0043_00582	Ef_aus0045_01126	Ef_aus0053_00558	Ef_aus0055_00038	Ef_aus0065_02672	Ef_aus0070_01059	Ef_aus0078_00855	Ef_aus0080_00071	Ef_aus0084_00285
Ef_aus0233_chr_phage-2	1941	hypothetical protein	Ef_04112313871_02091	Ef_11-9295564_00596	Ef_11282884_00624	Ef_32605238_00635	Ef_524685928_02702	Ef_9150823H_00572	Ef_aesops12030_00666	Ef_aesops12035_00770	Ef_aesops12037_00545	Ef_aesops12038_00633	Ef_aesops12041_00522	Ef_aesops12057_00678	Ef_aesops12062_00642	Ef_aesops13004_00648	Ef_aesops13028_00494	Ef_aesops13032_00621	Ef_aesops13034_00770	Ef_aus0002_00611	Ef_aus0003_01985	aus0004_chr_p1-3.fna_01480 aus0004_chr_p1-3.fna_00809	*	Ef_aus0006_02768	*	*	*	Ef_aus0012_00282	Ef_aus0014_00044	Ef_aus0015_00407	Ef_aus0016_00151	Ef_aus0019_02400	Ef_aus0021_02958	Ef_aus0023_00368	*	*	Ef_aus0029_00037	Ef_aus0031_00039	*	Ef_aus0041_01450	Ef_aus0043_00583	Ef_aus0045_01127	Ef_aus0053_00557	Ef_aus0055_00037	Ef_aus0065_02671	Ef_aus0070_01060	Ef_aus0078_00854	Ef_aus0080_00072	Ef_aus0084_00284
Ef_aus0233_chr_phage-2	1936	phage anti-repressor protein	Ef_04112313871_02090	Ef_11-9295564_00595	Ef_11282884_00623	Ef_32605238_00636	Ef_524685928_02703	Ef_9150823H_00571	Ef_aesops12030_00667	Ef_aesops12035_00771	Ef_aesops12037_00544	Ef_aesops12038_00632	Ef_aesops12041_00521	Ef_aesops12057_00679	Ef_aesops12062_00641	Ef_aesops13004_00647	Ef_aesops13028_00493	Ef_aesops13032_00620	Ef_aesops13034_00771	Ef_aus0002_00610	Ef_aus0003_01984	aus0004_chr_p1-3.fna_01479 aus0004_chr_p1-3.fna_00810	*	Ef_aus0006_02767	*	*	Ef_aus0010_02241	Ef_aus0012_00283	Ef_aus0014_00043	Ef_aus0015_00408	Ef_aus0016_00152	Ef_aus0019_02401	Ef_aus0021_01954	Ef_aus0023_00367	Ef_aus0025_00725	Ef_aus0026_00357	Ef_aus0029_00036	Ef_aus0031_00038	*	Ef_aus0041_01451	Ef_aus0043_00584	Ef_aus0045_01128	Ef_aus0053_00556	Ef_aus0055_00036	*	Ef_aus0070_01061	Ef_aus0078_00853	Ef_aus0080_00073	Ef_aus0084_00283
Ef_aus0233_chr_phage-2	1935	hypothetical protein	Ef_04112313871_02089	Ef_11-9295564_00594	Ef_11282884_00622	Ef_32605238_00637	Ef_524685928_02704	Ef_9150823H_00570	Ef_aesops12030_00668	Ef_aesops12035_00772	Ef_aesops12037_00543	Ef_aesops12038_00631	Ef_aesops12041_00520	Ef_aesops12057_00680	Ef_aesops12062_00640	Ef_aesops13004_00646	Ef_aesops13028_00492	Ef_aesops13032_00619	Ef_aesops13034_00772	Ef_aus0002_00609	Ef_aus0003_01983	aus0004_chr_p1-3.fna_01478 aus0004_chr_p1-3.fna_00811	*	Ef_aus0006_02766	*	Ef_aus0009_01132	*	Ef_aus0012_00284	Ef_aus0014_00042	Ef_aus0015_00409	Ef_aus0016_00153	*	Ef_aus0021_01955	Ef_aus0023_00366	Ef_aus0025_00724	Ef_aus0026_00356	Ef_aus0029_00035	Ef_aus0031_00037	*	Ef_aus0041_01452	Ef_aus0043_00585	Ef_aus0045_01129	Ef_aus0053_00555	Ef_aus0055_00035	Ef_aus0065_02423	Ef_aus0070_01062	Ef_aus0078_00852	Ef_aus0080_00074	Ef_aus0084_00282
Ef_aus0233_chr_phage-2	1934	phage protein	Ef_04112313871_02088	Ef_11-9295564_00593	Ef_11282884_00621	Ef_32605238_00638	Ef_524685928_02705	Ef_9150823H_00569	Ef_aesops12030_00669	Ef_aesops12035_00773	Ef_aesops12037_00542	Ef_aesops12038_00630	Ef_aesops12041_00519	Ef_aesops12057_00681	Ef_aesops12062_00639	Ef_aesops13004_00645	Ef_aesops13028_00491	Ef_aesops13032_00618	Ef_aesops13034_00773	Ef_aus0002_00608	Ef_aus0003_01982	aus0004_chr_p1-3.fna_01477 aus0004_chr_p1-3.fna_00812	*	Ef_aus0006_02765	Ef_aus0007_02809	*	*	Ef_aus0012_00285	Ef_aus0014_00041	Ef_aus0015_00410	Ef_aus0016_00154	Ef_aus0019_02748	*	Ef_aus0023_00365	*	*	Ef_aus0029_00034	Ef_aus0031_00036	Ef_aus0038_00132	Ef_aus0041_01453	Ef_aus0043_00586	*	Ef_aus0053_00554	Ef_aus0055_00034	Ef_aus0065_02424	Ef_aus0070_01063	Ef_aus0078_00851	Ef_aus0080_00075	Ef_aus0084_00281
Ef_aus0233_chr_phage-2	1933	hypothetical protein	Ef_04112313871_02602 Ef_04112313871_02087	Ef_11-9295564_00592	Ef_11282884_01940 Ef_11282884_00620	Ef_32605238_00639	Ef_524685928_02706 Ef_524685928_02159 Ef_524685928_01977	Ef_9150823H_00568	Ef_aesops12030_00670	Ef_aesops12035_00774	Ef_aesops12037_00541	Ef_aesops12038_00629	Ef_aesops12041_00518	Ef_aesops12057_00682	Ef_aesops12062_00638	Ef_aesops13004_00644	Ef_aesops13028_00490	Ef_aesops13032_00617	Ef_aesops13034_00774	Ef_aus0002_00607	Ef_aus0003_01981	aus0004_chr_p1-3.fna_02441 aus0004_chr_p1-3.fna_01476 aus0004_chr_p1-3.fna_00813	*	Ef_aus0006_02860	*	Ef_aus0009_01134	Ef_aus0010_02244	Ef_aus0012_00286	Ef_aus0014_00040	Ef_aus0015_00411	Ef_aus0016_00155	Ef_aus0019_02664 Ef_aus0019_02647	Ef_aus0021_01957	Ef_aus0023_00364	*	*	Ef_aus0029_00033	Ef_aus0031_00035	Ef_aus0038_01958 Ef_aus0038_00131	Ef_aus0041_01454 Ef_aus0041_01105	Ef_aus0043_00666 Ef_aus0043_00587	Ef_aus0045_02906	Ef_aus0053_00657 Ef_aus0053_00553	Ef_aus0055_00033	Ef_aus0065_02425 Ef_aus0065_01713	Ef_aus0070_01064 Ef_aus0070_00508	Ef_aus0078_00850 Ef_aus0078_00788	Ef_aus0080_00076	Ef_aus0084_00280
Ef_aus0233_chr_phage-2	1932	hypothetical protein	Ef_04112313871_02086	Ef_11-9295564_00591	Ef_11282884_00619	Ef_32605238_00640	Ef_524685928_02707	Ef_9150823H_00567	Ef_aesops12030_00671	Ef_aesops12035_00775	Ef_aesops12037_00540	Ef_aesops12038_00628	Ef_aesops12041_00517	Ef_aesops12057_00683	Ef_aesops12062_00637	Ef_aesops13004_00643	Ef_aesops13028_00489	Ef_aesops13032_00616	Ef_aesops13034_00775	Ef_aus0002_00606	Ef_aus0003_01980	aus0004_chr_p1-3.fna_02440 aus0004_chr_p1-3.fna_01475 aus0004_chr_p1-3.fna_00814	*	*	*	*	*	Ef_aus0012_00287	Ef_aus0014_00039	Ef_aus0015_00412	Ef_aus0016_00156	Ef_aus0019_02665	*	Ef_aus0023_00363	*	*	Ef_aus0029_00032	Ef_aus0031_00034	*	Ef_aus0041_01455	Ef_aus0043_00588	*	Ef_aus0053_00552	Ef_aus0055_00032	Ef_aus0065_02426	Ef_aus0070_01065	Ef_aus0078_00849	Ef_aus0080_00077	Ef_aus0084_00279
Ef_aus0233_chr_phage-2	1931	hypothetical protein	Ef_04112313871_02600	Ef_11-9295564_00590	Ef_11282884_01942	Ef_32605238_00641	Ef_524685928_01979	Ef_9150823H_00566	Ef_aesops12030_00672	Ef_aesops12035_00776	Ef_aesops12037_00539	Ef_aesops12038_00627	Ef_aesops12041_00516	Ef_aesops12057_00684	Ef_aesops12062_00636	Ef_aesops13004_00642	Ef_aesops13028_00488	Ef_aesops13032_00615	Ef_aesops13034_00776	Ef_aus0002_00605	Ef_aus0003_01979	aus0004_chr_p1-3.fna_02439 aus0004_chr_p1-3.fna_01474 aus0004_chr_p1-3.fna_00815	*	Ef_aus0006_02704 Ef_aus0006_02687	Ef_aus0007_02742 Ef_aus0007_02698	*	Ef_aus0010_02246	Ef_aus0012_00288	Ef_aus0014_00038	Ef_aus0015_00413	Ef_aus0016_00157	Ef_aus0019_02666	Ef_aus0021_02172	Ef_aus0023_00362	*	*	Ef_aus0029_00031	*	Ef_aus0038_01956	Ef_aus0041_01456	Ef_aus0043_00589	*	Ef_aus0053_00551	Ef_aus0055_00031	Ef_aus0065_01715	Ef_aus0070_01066	Ef_aus0078_00848	Ef_aus0080_00078	Ef_aus0084_00278
Ef_aus0233_chr_phage-2	1930	hypothetical protein	Ef_04112313871_02599 Ef_04112313871_02084	Ef_11-9295564_00589	Ef_11282884_01943 Ef_11282884_00617	Ef_32605238_00642	Ef_524685928_02709 Ef_524685928_01980	Ef_9150823H_00565	Ef_aesops12030_00673	Ef_aesops12035_00777	Ef_aesops12037_00538	Ef_aesops12038_00626	Ef_aesops12041_00515	Ef_aesops12057_00685	Ef_aesops12062_00635	Ef_aesops13004_00641	Ef_aesops13028_00487	Ef_aesops13032_00614	Ef_aesops13034_00777	Ef_aus0002_00604	Ef_aus0003_01978	aus0004_chr_p1-3.fna_01473 aus0004_chr_p1-3.fna_00816	*	Ef_aus0006_02686	Ef_aus0007_02697	*	Ef_aus0010_02247	Ef_aus0012_00289	Ef_aus0014_00037	Ef_aus0015_00414	Ef_aus0016_00158	Ef_aus0019_02667	Ef_aus0021_02173	Ef_aus0023_00361	Ef_aus0025_00718	Ef_aus0026_00350	Ef_aus0029_00030	Ef_aus0031_00032	Ef_aus0038_01955	Ef_aus0041_01457	Ef_aus0043_00590	Ef_aus0045_02656	Ef_aus0053_00550	Ef_aus0055_00030	Ef_aus0065_02428 Ef_aus0065_01716	Ef_aus0070_01067	Ef_aus0078_00847	Ef_aus0080_00079	Ef_aus0084_00277
Ef_aus0233_chr_phage-2	2460	hypothetical protein	Ef_04112313871_02083	Ef_11-9295564_00588	Ef_11282884_00616	Ef_32605238_00643	Ef_524685928_02710	Ef_9150823H_00564	Ef_aesops12030_00674	Ef_aesops12035_00778	Ef_aesops12037_00537	Ef_aesops12038_00625	Ef_aesops12041_00514	Ef_aesops12057_00686	Ef_aesops12062_00634	Ef_aesops13004_00640	Ef_aesops13028_00486	Ef_aesops13032_00613	Ef_aesops13034_00778	Ef_aus0002_00603	Ef_aus0003_01977	aus0004_chr_p1-3.fna_00817 aus0004_chr_p1-3.fna_01472	*	Ef_aus0006_02685	Ef_aus0007_02696	*	*	Ef_aus0012_00290	Ef_aus0014_00036	Ef_aus0015_00415	Ef_aus0016_00159	Ef_aus0019_02668	Ef_aus0021_02174	Ef_aus0023_00360	Ef_aus0025_00717	Ef_aus0026_00349	*	Ef_aus0031_00031	*	Ef_aus0041_01458	*	Ef_aus0045_02655	*	*	Ef_aus0065_02429	Ef_aus0070_01068	*	Ef_aus0080_00080	Ef_aus0084_00276
Ef_aus0233_chr_phage-2	1723	hypothetical protein	Ef_04112313871_02082	Ef_11-9295564_00587	Ef_11282884_00615	Ef_32605238_00644	Ef_524685928_02711 Ef_524685928_02163	Ef_9150823H_00563	Ef_aesops12030_01693 Ef_aesops12030_00675	Ef_aesops12035_00779	Ef_aesops12037_00536	Ef_aesops12038_00624	Ef_aesops12041_00513	Ef_aesops12057_00687	Ef_aesops12062_00633	Ef_aesops13004_00639	Ef_aesops13028_00485	Ef_aesops13032_00612	Ef_aesops13034_00779	Ef_aus0002_00602	Ef_aus0003_01976	aus0004_chr_p1-3.fna_01471 aus0004_chr_p1-3.fna_00818	Ef_aus0005_00522	Ef_aus0006_02684	Ef_aus0007_01839 Ef_aus0007_02695	Ef_aus0009_01424 Ef_aus0009_01140	Ef_aus0010_01032	Ef_aus0012_00291	Ef_aus0014_00035	Ef_aus0015_00416	Ef_aus0016_00160	Ef_aus0019_02669 Ef_aus0019_02651	Ef_aus0021_02175 Ef_aus0021_01961	Ef_aus0023_00359	Ef_aus0025_01234 Ef_aus0025_00716	Ef_aus0026_01204 Ef_aus0026_00348	Ef_aus0029_02071	Ef_aus0031_01088 Ef_aus0031_00030	Ef_aus0038_00127	Ef_aus0041_01101 Ef_aus0041_01459	Ef_aus0043_00662	Ef_aus0045_02862 Ef_aus0045_02654	Ef_aus0053_00653	Ef_aus0055_02045	Ef_aus0065_02430	Ef_aus0070_03170 Ef_aus0070_01886 Ef_aus0070_01069	Ef_aus0078_00792 Ef_aus0078_01438	Ef_aus0080_02188 Ef_aus0080_00081	Ef_aus0084_02269 Ef_aus0084_00275
Ef_aus0233_chr_phage-2	1929	hypothetical protein	Ef_04112313871_02598 Ef_04112313871_02081	Ef_11-9295564_00586	Ef_11282884_01944 Ef_11282884_00614	Ef_32605238_00645	Ef_524685928_02712 Ef_524685928_02164 Ef_524685928_01981	Ef_9150823H_00562	Ef_aesops12030_01694 Ef_aesops12030_00676	Ef_aesops12035_00780	Ef_aesops12037_00535	Ef_aesops12038_00623	Ef_aesops12041_00512	Ef_aesops12057_00688	Ef_aesops12062_00632	Ef_aesops13004_00638	Ef_aesops13028_00484	Ef_aesops13032_00611	Ef_aesops13034_00780	Ef_aus0002_00601	Ef_aus0003_01975	aus0004_chr_p1-3.fna_02438 aus0004_chr_p1-3.fna_01470 aus0004_chr_p1-3.fna_00819	Ef_aus0005_00523	Ef_aus0006_02703 Ef_aus0006_02683	Ef_aus0007_02741 Ef_aus0007_02694	Ef_aus0009_01423 Ef_aus0009_01141	Ef_aus0010_01033 Ef_aus0010_02248	Ef_aus0012_00292	Ef_aus0014_00034	Ef_aus0015_00417	Ef_aus0016_00161	*	Ef_aus0021_02176 Ef_aus0021_01962	Ef_aus0023_00358	Ef_aus0025_00715	Ef_aus0026_00347	Ef_aus0029_00029	Ef_aus0031_00029	Ef_aus0038_01954 Ef_aus0038_00126	*	Ef_aus0043_00661 Ef_aus0043_00591	Ef_aus0045_02861 Ef_aus0045_02653	Ef_aus0053_00652 Ef_aus0053_00549	Ef_aus0055_00029	Ef_aus0065_02431 Ef_aus0065_01717	*	Ef_aus0078_00793 Ef_aus0078_00846	Ef_aus0080_02189 Ef_aus0080_00082	Ef_aus0084_02270 Ef_aus0084_00274
Ef_aus0233_chr_phage-2	2333	prophage pi3 protein 33	Ef_04112313871_02593 Ef_04112313871_02080	Ef_11-9295564_00585	Ef_11282884_01949 Ef_11282884_00613	Ef_32605238_00646	Ef_524685928_02713 Ef_524685928_01986 Ef_524685928_02165	Ef_9150823H_00561	Ef_aesops12030_01695 Ef_aesops12030_00677	Ef_aesops12035_00781	Ef_aesops12037_00534	Ef_aesops12038_00622	Ef_aesops12041_00511	Ef_aesops12057_00689	Ef_aesops12062_00631	Ef_aesops13004_00637	Ef_aesops13028_00483	Ef_aesops13032_00610	Ef_aesops13034_00781	Ef_aus0002_00600	Ef_aus0003_01974	aus0004_chr_p1-3.fna_02437 aus0004_chr_p1-3.fna_01469 aus0004_chr_p1-3.fna_00820	*	Ef_aus0006_02702 Ef_aus0006_02682	Ef_aus0007_02740 Ef_aus0007_02693	Ef_aus0009_01421 Ef_aus0009_01142	*	Ef_aus0012_00293	Ef_aus0014_00033	Ef_aus0015_00418	Ef_aus0016_00162	Ef_aus0019_02710	Ef_aus0021_01963 Ef_aus0021_02177	Ef_aus0023_00357	Ef_aus0025_00714	Ef_aus0026_00346	*	Ef_aus0031_00028	Ef_aus0038_01949 Ef_aus0038_00125	Ef_aus0041_03123	Ef_aus0043_00660	Ef_aus0045_02860	Ef_aus0053_00651	*	Ef_aus0065_02432 Ef_aus0065_01722	Ef_aus0070_03162	Ef_aus0078_00794	Ef_aus0080_00083	Ef_aus0084_00273
Ef_aus0233_chr_phage-2	2332	hypothetical protein	*	Ef_11-9295564_00584	*	Ef_32605238_00647	Ef_524685928_02166	Ef_9150823H_00560	Ef_aesops12030_00678	Ef_aesops12035_00782	Ef_aesops12037_00533	Ef_aesops12038_00621	Ef_aesops12041_00510	Ef_aesops12057_00690	Ef_aesops12062_00630	Ef_aesops13004_00636	Ef_aesops13028_00482	Ef_aesops13032_00609	Ef_aesops13034_00782	Ef_aus0002_00599	Ef_aus0003_01973	aus0004_chr_p1-3.fna_01468 aus0004_chr_p1-3.fna_00821	*	Ef_aus0006_02681	Ef_aus0007_02692	*	*	Ef_aus0012_00294	Ef_aus0014_00032	Ef_aus0015_00419	Ef_aus0016_00163	Ef_aus0019_02709	Ef_aus0021_02178	Ef_aus0023_00356	*	*	*	*	Ef_aus0038_00124	Ef_aus0041_03124	Ef_aus0043_00659	Ef_aus0045_02859	Ef_aus0053_00650	*	*	Ef_aus0070_03163	Ef_aus0078_00795	Ef_aus0080_00084	Ef_aus0084_00272
Ef_aus0233_chr_phage-2	2461	putative phage protein YopX	*	Ef_11-9295564_00583	*	Ef_32605238_00648	*	Ef_9150823H_00559	Ef_aesops12030_00679	Ef_aesops12035_00783	Ef_aesops12037_00532	Ef_aesops12038_00620	Ef_aesops12041_00509	Ef_aesops12057_00691	Ef_aesops12062_00629	Ef_aesops13004_00635	Ef_aesops13028_00481	Ef_aesops13032_00608	Ef_aesops13034_00783	Ef_aus0002_00598	Ef_aus0003_01972	aus0004_chr_p1-3.fna_00822 aus0004_chr_p1-3.fna_01467	*	Ef_aus0006_02680	Ef_aus0007_02691	*	*	Ef_aus0012_00295	Ef_aus0014_00031	Ef_aus0015_00420	Ef_aus0016_00164	Ef_aus0019_02708	Ef_aus0021_02179	Ef_aus0023_00355	*	*	*	*	Ef_aus0038_00123	Ef_aus0041_02972	*	*	*	*	*	Ef_aus0070_03111	*	Ef_aus0080_00085	Ef_aus0084_00271
Ef_aus0233_chr_phage-2	2462	hypothetical protein	*	Ef_11-9295564_00582	*	Ef_32605238_00649	*	Ef_9150823H_00558	Ef_aesops12030_00680	Ef_aesops12035_00784	Ef_aesops12037_00531	Ef_aesops12038_00619	Ef_aesops12041_00508	Ef_aesops12057_00692	Ef_aesops12062_00628	Ef_aesops13004_00634	Ef_aesops13028_00480	Ef_aesops13032_00607	Ef_aesops13034_00784	Ef_aus0002_00597	Ef_aus0003_01971	aus0004_chr_p1-3.fna_00823 aus0004_chr_p1-3.fna_01466	*	Ef_aus0006_02679	Ef_aus0007_02690	*	*	Ef_aus0012_00296	Ef_aus0014_00030	Ef_aus0015_00421	Ef_aus0016_00165	*	Ef_aus0021_02180	Ef_aus0023_00354	*	*	*	*	*	Ef_aus0041_02973	*	*	*	*	*	Ef_aus0070_03112	*	Ef_aus0080_00086	Ef_aus0084_02816
Ef_aus0233_chr_phage-2	2463	hypothetical protein	*	Ef_11-9295564_00581	*	Ef_32605238_00650	*	Ef_9150823H_00557	Ef_aesops12030_00681	Ef_aesops12035_00785	Ef_aesops12037_00530	Ef_aesops12038_00618	Ef_aesops12041_00507	Ef_aesops12057_00693	Ef_aesops12062_00627	Ef_aesops13004_00633	Ef_aesops13028_00479	Ef_aesops13032_00606	Ef_aesops13034_00785	Ef_aus0002_00596	Ef_aus0003_01970	aus0004_chr_p1-3.fna_00824 aus0004_chr_p1-3.fna_01465	*	Ef_aus0006_02678	Ef_aus0007_02689	*	*	Ef_aus0012_00297	Ef_aus0014_00029	Ef_aus0015_00422	Ef_aus0016_00166	Ef_aus0019_02671	Ef_aus0021_02181	Ef_aus0023_00353	*	*	*	*	*	Ef_aus0041_02974	*	*	*	*	*	Ef_aus0070_03113	*	Ef_aus0080_00087	Ef_aus0084_02817
Ef_aus0233_chr_phage-2	851	phage transcriptional regulator ArpU family	Ef_04112313871_02073	Ef_11-9295564_00580	Ef_11282884_00606	Ef_32605238_00651	Ef_524685928_03112	Ef_9150823H_00556	Ef_aesops12030_01703 Ef_aesops12030_00682	Ef_aesops12035_00786	Ef_aesops12037_00529	Ef_aesops12038_00617	Ef_aesops12041_00506	Ef_aesops12057_00694	Ef_aesops12062_00626	Ef_aesops13004_00632	Ef_aesops13028_00478	Ef_aesops13032_00605	Ef_aesops13034_00786	Ef_aus0002_00595	Ef_aus0003_01969	aus0004_chr_p1-3.fna_01464 aus0004_chr_p1-3.fna_00825	*	Ef_aus0006_02677	Ef_aus0007_02688 Ef_aus0007_02159	*	Ef_aus0010_01046	Ef_aus0012_00298	Ef_aus0014_00028	Ef_aus0015_00423	Ef_aus0016_00167	Ef_aus0019_02672	Ef_aus0021_02182 Ef_aus0021_01974	Ef_aus0023_00352	Ef_aus0025_01245	Ef_aus0026_01215	Ef_aus0029_02078 Ef_aus0029_01733	Ef_aus0031_01099 Ef_aus0031_00021	Ef_aus0038_00120	Ef_aus0041_02975 Ef_aus0041_01215	*	Ef_aus0045_02642 Ef_aus0045_01229	Ef_aus0053_02898	Ef_aus0055_02038 Ef_aus0055_01667	Ef_aus0065_02439	Ef_aus0070_01270	Ef_aus0078_01570 Ef_aus0078_01431	Ef_aus0080_00088	*
Ef_aus0233_chr_phage-2	2454	hypothetical protein	Ef_04112313871_02349	Ef_11-9295564_00579	Ef_11282884_02211	Ef_32605238_00652	Ef_524685928_01992	Ef_9150823H_00555	Ef_aesops12030_00683	Ef_aesops12035_00787	Ef_aesops12037_00528	Ef_aesops12038_00616	Ef_aesops12041_00505	Ef_aesops12057_00695	Ef_aesops12062_00625	Ef_aesops13004_00631	Ef_aesops13028_00477	Ef_aesops13032_00604	Ef_aesops13034_00787	Ef_aus0002_00594	Ef_aus0003_01968	aus0004_chr_p1-3.fna_01463 aus0004_chr_p1-3.fna_00826	*	Ef_aus0006_02676	Ef_aus0007_02687	*	*	Ef_aus0012_00299	Ef_aus0014_00027	Ef_aus0015_00424	Ef_aus0016_00168	Ef_aus0019_02673	Ef_aus0021_02183	Ef_aus0023_00351	*	*	*	Ef_aus0031_00020	Ef_aus0038_01943	Ef_aus0041_02976	*	*	Ef_aus0053_02976	*	Ef_aus0065_01728	Ef_aus0070_03081	*	*	Ef_aus0084_02173
Ef_aus0233_chr_phage-2	2464	CRISPR associated protein Cas2_1	Ef_04112313871_02350	Ef_11-9295564_00578	Ef_11282884_02212	Ef_32605238_00653	Ef_524685928_01993	Ef_9150823H_00554	Ef_aesops12030_00684	Ef_aesops12035_00788	Ef_aesops12037_00527	Ef_aesops12038_00615	Ef_aesops12041_00504	Ef_aesops12057_00696	Ef_aesops12062_00624	Ef_aesops13004_00630	Ef_aesops13028_00476	Ef_aesops13032_00603	Ef_aesops13034_00788	Ef_aus0002_00593	Ef_aus0003_01967	aus0004_chr_p1-3.fna_00827 aus0004_chr_p1-3.fna_01462	*	Ef_aus0006_02675	Ef_aus0007_02686	*	*	Ef_aus0012_00300	Ef_aus0014_00026	Ef_aus0015_00425	Ef_aus0016_00169	Ef_aus0019_02674	Ef_aus0021_02184	Ef_aus0023_00350	*	*	*	Ef_aus0031_00019	Ef_aus0038_01942	Ef_aus0041_02977	*	*	*	*	Ef_aus0065_01729	Ef_aus0070_03080	*	*	Ef_aus0084_02174
Ef_aus0233_chr_phage-2	2465	hypothetical protein	Ef_04112313871_02351	Ef_11-9295564_00577	Ef_11282884_02213	Ef_32605238_00654	Ef_524685928_01994	Ef_9150823H_00553	Ef_aesops12030_00685	Ef_aesops12035_00789	Ef_aesops12037_00526	Ef_aesops12038_00614	Ef_aesops12041_00503	Ef_aesops12057_00697	Ef_aesops12062_00623	Ef_aesops13004_00629	Ef_aesops13028_00475	Ef_aesops13032_00602	Ef_aesops13034_00789	Ef_aus0002_00592	Ef_aus0003_01966	aus0004_chr_p1-3.fna_00828 aus0004_chr_p1-3.fna_01461	*	Ef_aus0006_02674	Ef_aus0007_02685	*	*	Ef_aus0012_00301	Ef_aus0014_00025	Ef_aus0015_00426	Ef_aus0016_00170	Ef_aus0019_02135	Ef_aus0021_02185	Ef_aus0023_00349	Ef_aus0025_00701	Ef_aus0026_00333	*	Ef_aus0031_00018	Ef_aus0038_02411	Ef_aus0041_02978	*	Ef_aus0045_02639	*	*	Ef_aus0065_01730	Ef_aus0070_03079	*	Ef_aus0080_01972	Ef_aus0084_02175
Ef_aus0233_chr_phage-2	2331	HNH endonuclease	Ef_04112313871_02352	Ef_11-9295564_00576	Ef_11282884_02214	Ef_32605238_00655	Ef_524685928_02882	Ef_9150823H_00552	Ef_aesops12030_00686	Ef_aesops12035_00790	Ef_aesops12037_00525	Ef_aesops12038_00613	Ef_aesops12041_00502	Ef_aesops12057_00698	Ef_aesops12062_00622	Ef_aesops13004_00628	Ef_aesops13028_00474	Ef_aesops13032_00601	Ef_aesops13034_00790	Ef_aus0002_00591	Ef_aus0003_01965	aus0004_chr_p1-3.fna_02425 aus0004_chr_p1-3.fna_01460 aus0004_chr_p1-3.fna_00829	*	Ef_aus0006_02541	Ef_aus0007_02596	Ef_aus0009_01407	Ef_aus0010_01051	Ef_aus0012_00302	Ef_aus0014_00024	Ef_aus0015_00427	Ef_aus0016_00171	Ef_aus0019_02136	Ef_aus0021_02186	Ef_aus0023_00348	Ef_aus0025_00700	Ef_aus0026_00332	*	Ef_aus0031_00017	Ef_aus0038_02412	Ef_aus0041_02674	Ef_aus0043_00653	Ef_aus0045_02832	Ef_aus0053_00644	*	Ef_aus0065_01731	Ef_aus0070_02951	Ef_aus0078_00801	Ef_aus0080_01973	Ef_aus0084_02176
Ef_aus0233_chr_phage-2	2330	hypothetical protein	Ef_04112313871_02353	Ef_11-9295564_00575	Ef_11282884_02215	Ef_32605238_00656	Ef_524685928_02883	Ef_9150823H_00551	Ef_aesops12030_00687	Ef_aesops12035_00791	Ef_aesops12037_00524	Ef_aesops12038_00612	Ef_aesops12041_00501	Ef_aesops12057_00699	Ef_aesops12062_00621	Ef_aesops13004_00627	Ef_aesops13028_00473	Ef_aesops13032_00600	Ef_aesops13034_00791	Ef_aus0002_00590	Ef_aus0003_01964	aus0004_chr_p1-3.fna_02424 aus0004_chr_p1-3.fna_01459 aus0004_chr_p1-3.fna_00830	*	Ef_aus0006_02542	Ef_aus0007_02597	Ef_aus0009_01406	Ef_aus0010_01052	Ef_aus0012_00303	Ef_aus0014_00023	Ef_aus0015_00428	Ef_aus0016_00172	Ef_aus0019_02137	Ef_aus0021_02187	Ef_aus0023_00347	Ef_aus0025_00699	Ef_aus0026_00331	*	Ef_aus0031_00016	Ef_aus0038_02413	Ef_aus0041_02675	Ef_aus0043_00652	Ef_aus0045_02833	Ef_aus0053_00643	*	Ef_aus0065_01732	Ef_aus0070_02952	Ef_aus0078_00802	Ef_aus0080_01974	Ef_aus0084_02177
Ef_aus0233_chr_phage-2	2329	Phage terminase small subunit	Ef_04112313871_02354	Ef_11-9295564_00574	Ef_11282884_02216	Ef_32605238_00657	Ef_524685928_02884	Ef_9150823H_00550	Ef_aesops12030_00688	Ef_aesops12035_00792	Ef_aesops12037_00523	Ef_aesops12038_00611	Ef_aesops12041_00500	Ef_aesops12057_00700	Ef_aesops12062_00620	Ef_aesops13004_00626	Ef_aesops13028_00472	Ef_aesops13032_00599	Ef_aesops13034_00792	Ef_aus0002_00589	Ef_aus0003_01963	aus0004_chr_p1-3.fna_02423 aus0004_chr_p1-3.fna_01458 aus0004_chr_p1-3.fna_00831	*	Ef_aus0006_02543	Ef_aus0007_02598	Ef_aus0009_01405	Ef_aus0010_01053	Ef_aus0012_00304	Ef_aus0014_00022	Ef_aus0015_00429	Ef_aus0016_00173	Ef_aus0019_02138	Ef_aus0021_02188	Ef_aus0023_00346	Ef_aus0025_00698	Ef_aus0026_00330	*	Ef_aus0031_00015	Ef_aus0038_02414	Ef_aus0041_02676	Ef_aus0043_00651	Ef_aus0045_02834	Ef_aus0053_00642	*	Ef_aus0065_01733	Ef_aus0070_02953	Ef_aus0078_00803	Ef_aus0080_01975	Ef_aus0084_02178
Ef_aus0233_chr_phage-2	2328	Phage Terminase	Ef_04112313871_02355	Ef_11-9295564_00573	Ef_11282884_02217	Ef_32605238_00658	Ef_524685928_02885	Ef_9150823H_00549	Ef_aesops12030_00689	Ef_aesops12035_00793	Ef_aesops12037_00522	Ef_aesops12038_00610	Ef_aesops12041_00499	Ef_aesops12057_00701	Ef_aesops12062_00619	Ef_aesops13004_00625	Ef_aesops13028_00471	Ef_aesops13032_00598	Ef_aesops13034_00793	Ef_aus0002_00588	Ef_aus0003_01962	aus0004_chr_p1-3.fna_02422 aus0004_chr_p1-3.fna_01457 aus0004_chr_p1-3.fna_00832	*	Ef_aus0006_02544	Ef_aus0007_02599	Ef_aus0009_01404	Ef_aus0010_01054	Ef_aus0012_00305	Ef_aus0014_00021	Ef_aus0015_00430	Ef_aus0016_00174	Ef_aus0019_02139	Ef_aus0021_02189	Ef_aus0023_00345	Ef_aus0025_00697	Ef_aus0026_00329	*	Ef_aus0031_00014	Ef_aus0038_02415	Ef_aus0041_02677	Ef_aus0043_00650	Ef_aus0045_02835	Ef_aus0053_00641	*	Ef_aus0065_01734	Ef_aus0070_02954	Ef_aus0078_00804	Ef_aus0080_01976	Ef_aus0084_02179
Ef_aus0233_chr_phage-2	2327	phage portal protein HK97 family	Ef_04112313871_02356	Ef_11-9295564_00572	Ef_11282884_02218	Ef_32605238_00659	Ef_524685928_02886	Ef_9150823H_00548	Ef_aesops12030_00690	Ef_aesops12035_00794	Ef_aesops12037_00521	Ef_aesops12038_00609	Ef_aesops12041_00498	Ef_aesops12057_00702	Ef_aesops12062_00618	Ef_aesops13004_00624	Ef_aesops13028_00470	Ef_aesops13032_00597	Ef_aesops13034_00794	Ef_aus0002_00587	Ef_aus0003_01961	aus0004_chr_p1-3.fna_02421 aus0004_chr_p1-3.fna_01456 aus0004_chr_p1-3.fna_00833	*	Ef_aus0006_02545	Ef_aus0007_02600	Ef_aus0009_01403	Ef_aus0010_01055	Ef_aus0012_00306	Ef_aus0014_00020	Ef_aus0015_00431	Ef_aus0016_00175	Ef_aus0019_02140	Ef_aus0021_02190	Ef_aus0023_00344	Ef_aus0025_00696	Ef_aus0026_00328	*	Ef_aus0031_00013	Ef_aus0038_02416	Ef_aus0041_02678	Ef_aus0043_00649	Ef_aus0045_02836	Ef_aus0053_00640	*	Ef_aus0065_01735	Ef_aus0070_02955	Ef_aus0078_00805	Ef_aus0080_01977	Ef_aus0084_02180
Ef_aus0233_chr_phage-2	2326	ATP-dependent Clp protease proteolytic subunit	Ef_04112313871_02357	Ef_11-9295564_00571	Ef_11282884_02219	Ef_32605238_00660	Ef_524685928_02887	Ef_9150823H_00547	Ef_aesops12030_00691	Ef_aesops12035_00795	Ef_aesops12037_00520	Ef_aesops12038_00608	Ef_aesops12041_00497	Ef_aesops12057_00703	Ef_aesops12062_00617	Ef_aesops13004_00623	Ef_aesops13028_00469	Ef_aesops13032_00596	Ef_aesops13034_00795	Ef_aus0002_00586	Ef_aus0003_01960	aus0004_chr_p1-3.fna_02420 aus0004_chr_p1-3.fna_01455 aus0004_chr_p1-3.fna_00834	*	Ef_aus0006_02546	Ef_aus0007_02601	Ef_aus0009_01402	Ef_aus0010_01056	Ef_aus0012_00307	Ef_aus0014_00019	Ef_aus0015_00432	Ef_aus0016_00176	Ef_aus0019_02141	Ef_aus0021_02191	Ef_aus0023_00343	Ef_aus0025_00695	Ef_aus0026_00327	*	Ef_aus0031_00012	Ef_aus0038_02417	Ef_aus0041_02679	Ef_aus0043_00648	Ef_aus0045_02977 Ef_aus0045_02976	Ef_aus0053_00639	*	Ef_aus0065_01736	Ef_aus0070_03138 Ef_aus0070_03137	Ef_aus0078_00806	Ef_aus0080_01978	Ef_aus0084_02181
Ef_aus0233_chr_phage-2	2325	Major phage capsid protein	Ef_04112313871_02358	Ef_11-9295564_00570	Ef_11282884_02220	Ef_32605238_00661	Ef_524685928_02888	Ef_9150823H_00546	Ef_aesops12030_00692	Ef_aesops12035_00796	Ef_aesops12037_00519	Ef_aesops12038_00607	Ef_aesops12041_00496	Ef_aesops12057_00704	Ef_aesops12062_00616	Ef_aesops13004_00622	Ef_aesops13028_00468	Ef_aesops13032_00595	Ef_aesops13034_00796	Ef_aus0002_00585	Ef_aus0003_01959	aus0004_chr_p1-3.fna_02419 aus0004_chr_p1-3.fna_01454 aus0004_chr_p1-3.fna_00835	*	Ef_aus0006_02547	Ef_aus0007_02602	Ef_aus0009_01401	Ef_aus0010_01057	Ef_aus0012_00308	Ef_aus0014_00018	Ef_aus0015_00433	Ef_aus0016_00177	Ef_aus0019_02142	Ef_aus0021_02192	Ef_aus0023_00342	Ef_aus0025_00694	Ef_aus0026_00326	*	Ef_aus0031_00011	Ef_aus0038_02418	Ef_aus0041_02680	Ef_aus0043_00647	Ef_aus0045_02995	Ef_aus0053_00638	*	Ef_aus0065_01737	Ef_aus0070_03152	Ef_aus0078_00807	Ef_aus0080_01979	Ef_aus0084_02182
Ef_aus0233_chr_phage-2	2324	prophage pi2 protein 34	Ef_04112313871_02359	Ef_11-9295564_00569	Ef_11282884_02221	Ef_32605238_00662	Ef_524685928_03102 Ef_524685928_03062	Ef_9150823H_00545	Ef_aesops12030_00693	Ef_aesops12035_00797	Ef_aesops12037_00518	Ef_aesops12038_00606	Ef_aesops12041_00495	Ef_aesops12057_00705	Ef_aesops12062_00615	Ef_aesops13004_00621	Ef_aesops13028_00467	Ef_aesops13032_00594	Ef_aesops13034_00797	Ef_aus0002_00584	Ef_aus0003_01958	aus0004_chr_p1-3.fna_02418 aus0004_chr_p1-3.fna_01453 aus0004_chr_p1-3.fna_00836	*	Ef_aus0006_02548	Ef_aus0007_02603	Ef_aus0009_01400	Ef_aus0010_01058	Ef_aus0012_00309	Ef_aus0014_00017	Ef_aus0015_00434	Ef_aus0016_00178	Ef_aus0019_02143	Ef_aus0021_02193	Ef_aus0023_00341	Ef_aus0025_00693	Ef_aus0026_00325	*	Ef_aus0031_00010	Ef_aus0038_02419	Ef_aus0041_02681	Ef_aus0043_00646	Ef_aus0045_03011 Ef_aus0045_03010	Ef_aus0053_00637	*	Ef_aus0065_01738	Ef_aus0070_03146 Ef_aus0070_03145	Ef_aus0078_00808	Ef_aus0080_01980	Ef_aus0084_02183
Ef_aus0233_chr_phage-2	2323	hypothetical protein	Ef_04112313871_02360	Ef_11-9295564_00568	Ef_11282884_02222	Ef_32605238_00663	Ef_524685928_03103 Ef_524685928_03063	Ef_9150823H_00544	Ef_aesops12030_00694	Ef_aesops12035_00798	Ef_aesops12037_00517	Ef_aesops12038_00605	Ef_aesops12041_00494	Ef_aesops12057_00706	Ef_aesops12062_00614	Ef_aesops13004_00620	Ef_aesops13028_00466	Ef_aesops13032_00593	Ef_aesops13034_00798	Ef_aus0002_00583	Ef_aus0003_01957	aus0004_chr_p1-3.fna_02417 aus0004_chr_p1-3.fna_01452 aus0004_chr_p1-3.fna_00837	*	Ef_aus0006_02549	Ef_aus0007_02604	Ef_aus0009_01399	Ef_aus0010_01059	Ef_aus0012_00310	Ef_aus0014_00016	Ef_aus0015_00435	Ef_aus0016_00179	Ef_aus0019_02144	Ef_aus0021_02194	Ef_aus0023_00340	Ef_aus0025_00692	Ef_aus0026_00324	*	Ef_aus0031_00009	Ef_aus0038_02420	Ef_aus0041_02682	Ef_aus0043_00645	Ef_aus0045_03005	Ef_aus0053_00636	*	Ef_aus0065_01739	Ef_aus0070_03147 Ef_aus0070_03144	Ef_aus0078_00809	Ef_aus0080_01981	Ef_aus0084_02184
Ef_aus0233_chr_phage-2	2322	putative phage head-tail adaptor	Ef_04112313871_02361	Ef_11-9295564_00567	Ef_11282884_02223	Ef_32605238_00664	Ef_524685928_03064	Ef_9150823H_00543	Ef_aesops12030_00695	Ef_aesops12035_00799	Ef_aesops12037_00516	Ef_aesops12038_00604	Ef_aesops12041_00493	Ef_aesops12057_00707	Ef_aesops12062_00613	Ef_aesops13004_00619	Ef_aesops13028_00465	Ef_aesops13032_00592	Ef_aesops13034_00799	Ef_aus0002_00582	Ef_aus0003_01956	aus0004_chr_p1-3.fna_02416 aus0004_chr_p1-3.fna_01451 aus0004_chr_p1-3.fna_00838	*	Ef_aus0006_02550	Ef_aus0007_02605	Ef_aus0009_01398	Ef_aus0010_01060	Ef_aus0012_00311	Ef_aus0014_00015	Ef_aus0015_00436	Ef_aus0016_00180	Ef_aus0019_02145	Ef_aus0021_02195	Ef_aus0023_00339	Ef_aus0025_00691	Ef_aus0026_00323	*	Ef_aus0031_00008	Ef_aus0038_02421	Ef_aus0041_02683	Ef_aus0043_00644	*	Ef_aus0053_00635	*	Ef_aus0065_01740	*	Ef_aus0078_00810	Ef_aus0080_01982	Ef_aus0084_02185
Ef_aus0233_chr_phage-2	2321	hypothetical protein	Ef_04112313871_02362	Ef_11-9295564_00566	Ef_11282884_02224	Ef_32605238_00665	Ef_524685928_03098 Ef_524685928_03081 Ef_524685928_03065	Ef_9150823H_00542	Ef_aesops12030_00696	Ef_aesops12035_00800	Ef_aesops12037_00515	Ef_aesops12038_00603	Ef_aesops12041_00492	Ef_aesops12057_00708	Ef_aesops12062_00612	Ef_aesops13004_00618	Ef_aesops13028_00464	Ef_aesops13032_00591	Ef_aesops13034_00800	Ef_aus0002_00581	Ef_aus0003_01955	aus0004_chr_p1-3.fna_02415 aus0004_chr_p1-3.fna_01450 aus0004_chr_p1-3.fna_00839	*	Ef_aus0006_02551	Ef_aus0007_02606	Ef_aus0009_01397	Ef_aus0010_01061	Ef_aus0012_00312	Ef_aus0014_00014	Ef_aus0015_00437	Ef_aus0016_00181	Ef_aus0019_02146	Ef_aus0021_02196	Ef_aus0023_00338	Ef_aus0025_00690	Ef_aus0026_00322	*	Ef_aus0031_00007	Ef_aus0038_02422	Ef_aus0041_02684	Ef_aus0043_00643	Ef_aus0045_03015 Ef_aus0045_03014	Ef_aus0053_00634	*	Ef_aus0065_01741	Ef_aus0070_03173 Ef_aus0070_03172	Ef_aus0078_00811	Ef_aus0080_01983	Ef_aus0084_02186
Ef_aus0233_chr_phage-2	2320	phage protein HK97 gp10 family protein	Ef_04112313871_02363	Ef_11-9295564_00565	Ef_11282884_02225	Ef_32605238_00666	Ef_524685928_03097 Ef_524685928_03082	Ef_9150823H_00541	Ef_aesops12030_00697	Ef_aesops12035_00801	Ef_aesops12037_00514	Ef_aesops12038_00602	Ef_aesops12041_00491	Ef_aesops12057_00709	Ef_aesops12062_00611	Ef_aesops13004_00617	Ef_aesops13028_00463	Ef_aesops13032_00590	Ef_aesops13034_00801	Ef_aus0002_00580	Ef_aus0003_01954	aus0004_chr_p1-3.fna_02414 aus0004_chr_p1-3.fna_01449 aus0004_chr_p1-3.fna_00840	*	Ef_aus0006_02552	Ef_aus0007_02607	Ef_aus0009_01396	Ef_aus0010_01062	Ef_aus0012_00313	Ef_aus0014_00013	Ef_aus0015_00438	Ef_aus0016_00182	Ef_aus0019_02147	Ef_aus0021_02197	Ef_aus0023_00337	Ef_aus0025_00689	Ef_aus0026_00321	*	Ef_aus0031_00006	Ef_aus0038_02423	Ef_aus0041_02685	Ef_aus0043_00642	Ef_aus0045_02868	Ef_aus0053_00633	*	Ef_aus0065_01742	Ef_aus0070_02982	Ef_aus0078_00812	Ef_aus0080_01984	Ef_aus0084_02187
Ef_aus0233_chr_phage-2	2319	phage major tail protein B	Ef_04112313871_02364	Ef_11-9295564_00564	Ef_11282884_02226	Ef_32605238_00667	Ef_524685928_03044	Ef_9150823H_00540	Ef_aesops12030_00698	Ef_aesops12035_00802	Ef_aesops12037_00513	Ef_aesops12038_00601	Ef_aesops12041_00490	Ef_aesops12057_00710	Ef_aesops12062_00610	Ef_aesops13004_00616	Ef_aesops13028_00462	Ef_aesops13032_00589	Ef_aesops13034_00802	Ef_aus0002_00579	Ef_aus0003_01953	aus0004_chr_p1-3.fna_02413 aus0004_chr_p1-3.fna_01448 aus0004_chr_p1-3.fna_00841	*	Ef_aus0006_02553	Ef_aus0007_02608	Ef_aus0009_01395	Ef_aus0010_01063	Ef_aus0012_00314	Ef_aus0014_00012	Ef_aus0015_00439	Ef_aus0016_00183	Ef_aus0019_02148	Ef_aus0021_02198	Ef_aus0023_00336	Ef_aus0025_00688	Ef_aus0026_00320	Ef_aus0029_03194	Ef_aus0031_00005	Ef_aus0038_02424	*	Ef_aus0043_00641	Ef_aus0045_02869	Ef_aus0053_00632	*	Ef_aus0065_01743	Ef_aus0070_02983	Ef_aus0078_00813	Ef_aus0080_01985	Ef_aus0084_02188
Ef_aus0233_chr_phage-2	2318	hypothetical protein	Ef_04112313871_02365	Ef_11-9295564_00563	Ef_11282884_02227	Ef_32605238_00668	Ef_524685928_03043	Ef_9150823H_00539	Ef_aesops12030_00699	Ef_aesops12035_00803	Ef_aesops12037_00512	Ef_aesops12038_00600	Ef_aesops12041_00489	Ef_aesops12057_00711	Ef_aesops12062_00609	Ef_aesops13004_00615	Ef_aesops13028_00461	Ef_aesops13032_00588	Ef_aesops13034_00803	Ef_aus0002_00578	Ef_aus0003_01952	*	*	Ef_aus0006_02903	Ef_aus0007_02894	Ef_aus0009_01394	Ef_aus0010_01064	Ef_aus0012_00315	Ef_aus0014_00011	Ef_aus0015_00440	Ef_aus0016_00184	Ef_aus0019_02149	*	Ef_aus0023_00335	*	*	*	Ef_aus0031_00004	Ef_aus0038_02425	Ef_aus0041_02686	Ef_aus0043_00640	Ef_aus0045_02870	Ef_aus0053_00631	*	Ef_aus0065_01744	Ef_aus0070_02984	Ef_aus0078_00814	Ef_aus0080_01986	Ef_aus0084_02189
Ef_aus0233_chr_phage-2	2317	phage tail tape measure protein TP901 family core region	Ef_04112313871_02366	Ef_11-9295564_00562	Ef_11282884_02228	Ef_32605238_00669	Ef_524685928_02982	Ef_9150823H_00538	Ef_aesops12030_00700	Ef_aesops12035_00804	Ef_aesops12037_00511	Ef_aesops12038_00599	Ef_aesops12041_00488	Ef_aesops12057_00712	Ef_aesops12062_00608	Ef_aesops13004_00614	Ef_aesops13028_00460	Ef_aesops13032_00587	Ef_aesops13034_00804	Ef_aus0002_00577	Ef_aus0003_01951	aus0004_chr_p1-3.fna_01446 aus0004_chr_p1-3.fna_00843	*	*	*	Ef_aus0009_01393	Ef_aus0010_01065	Ef_aus0012_00316	Ef_aus0014_00010	Ef_aus0015_00441	Ef_aus0016_00185	Ef_aus0019_02150	*	Ef_aus0023_00334	*	*	*	Ef_aus0031_00003	Ef_aus0038_02426	*	Ef_aus0043_00639	*	Ef_aus0053_00630	*	Ef_aus0065_01745	*	Ef_aus0078_00815	Ef_aus0080_01987	Ef_aus0084_02190
Ef_aus0233_chr_phage-2	2316	Phage tail component protein	Ef_04112313871_02367	Ef_11-9295564_00561	Ef_11282884_02229	Ef_32605238_00670	Ef_524685928_03002 Ef_524685928_02983	Ef_9150823H_00537	Ef_aesops12030_00701	Ef_aesops12035_00805	Ef_aesops12037_00510	Ef_aesops12038_00598	Ef_aesops12041_00487	Ef_aesops12057_00713	Ef_aesops12062_00607	Ef_aesops13004_00613	Ef_aesops13028_00459	Ef_aesops13032_00586	Ef_aesops13034_00805	Ef_aus0002_00576	Ef_aus0003_01950	aus0004_chr_p1-3.fna_02409 aus0004_chr_p1-3.fna_01445 aus0004_chr_p1-3.fna_00844	*	*	Ef_aus0007_02807	Ef_aus0009_01392	Ef_aus0010_01066	Ef_aus0012_00317	Ef_aus0014_00009	Ef_aus0015_00442	Ef_aus0016_00186	Ef_aus0019_02151	Ef_aus0021_02201	Ef_aus0023_00333	Ef_aus0025_00685	Ef_aus0026_00317	*	Ef_aus0031_00002	Ef_aus0038_02427	*	Ef_aus0043_00638	Ef_aus0045_02867 Ef_aus0045_02697	Ef_aus0053_00629	*	Ef_aus0065_01746	*	Ef_aus0078_00816	Ef_aus0080_01988	Ef_aus0084_02191
Ef_aus0233_chr_phage-2	2315	phage minor structural protein	Ef_04112313871_02368	Ef_11-9295564_00560	Ef_11282884_02230	Ef_32605238_00671	Ef_524685928_03000	Ef_9150823H_00536	Ef_aesops12030_00702	Ef_aesops12035_00806	Ef_aesops12037_00509	Ef_aesops12038_00597	Ef_aesops12041_00486	Ef_aesops12057_00714	Ef_aesops12062_00606	Ef_aesops13004_00612	Ef_aesops13028_00458	Ef_aesops13032_00585	Ef_aesops13034_00806	Ef_aus0002_00575	Ef_aus0003_01949	aus0004_chr_p1-3.fna_02408 aus0004_chr_p1-3.fna_01444 aus0004_chr_p1-3.fna_00845	*	Ef_aus0006_02788 Ef_aus0006_02783	Ef_aus0007_02763 Ef_aus0007_02758	Ef_aus0009_01391	Ef_aus0010_01067	Ef_aus0012_00318	Ef_aus0014_00008	Ef_aus0015_00443	Ef_aus0016_00187	Ef_aus0019_02152	Ef_aus0021_02202	Ef_aus0023_00332	Ef_aus0025_00684	Ef_aus0026_00316	*	Ef_aus0031_00001	Ef_aus0038_02664 Ef_aus0038_02621	Ef_aus0041_03024 Ef_aus0041_02835	Ef_aus0043_00637	Ef_aus0045_02866 Ef_aus0045_02698	Ef_aus0053_00628	*	Ef_aus0065_01747	Ef_aus0070_03050	Ef_aus0078_00817	Ef_aus0080_01989	Ef_aus0084_02192
Ef_aus0233_chr_phage-2	2533	hypothetical protein	*	Ef_11-9295564_00559	*	Ef_32605238_00672	*	Ef_9150823H_00535	Ef_aesops12030_00703	Ef_aesops12035_00807	Ef_aesops12037_00508	Ef_aesops12038_00596	Ef_aesops12041_00485	Ef_aesops12057_00715	Ef_aesops12062_00605	Ef_aesops13004_00611	Ef_aesops13028_00457	Ef_aesops13032_00584	Ef_aesops13034_00807	Ef_aus0002_00574	Ef_aus0003_01948	*	*	*	*	*	*	Ef_aus0012_00319	Ef_aus0014_00007	Ef_aus0015_00444	Ef_aus0016_00188	Ef_aus0019_02153	*	Ef_aus0023_00331	*	*	*	*	Ef_aus0038_02620	Ef_aus0041_02836	*	Ef_aus0045_02699	*	*	*	*	*	Ef_aus0080_01990	Ef_aus0084_02193
Ef_aus0233_chr_phage-2	850	hypothetical protein	*	Ef_11-9295564_00558	*	Ef_32605238_00673	Ef_524685928_03014	Ef_9150823H_00534	Ef_aesops12030_00704	Ef_aesops12035_00808	Ef_aesops12037_00507	Ef_aesops12038_00595	Ef_aesops12041_00484	Ef_aesops12057_00716	Ef_aesops12062_00604	Ef_aesops13004_00610	Ef_aesops13028_00456	Ef_aesops13032_00583	Ef_aesops13034_00808	Ef_aus0002_00573	Ef_aus0003_01947	aus0004_chr_p1-3.fna_01442 aus0004_chr_p1-3.fna_00847	Ef_aus0005_00552	Ef_aus0006_02869	Ef_aus0007_02853	Ef_aus0009_01173	Ef_aus0010_02282	Ef_aus0012_00320	Ef_aus0014_00006	Ef_aus0015_00445	Ef_aus0016_00189	Ef_aus0019_02154	Ef_aus0021_02893 Ef_aus0021_02790	Ef_aus0023_00330	Ef_aus0025_00682	Ef_aus0026_00314	Ef_aus0029_02105	Ef_aus0031_02761	*	Ef_aus0041_02837	Ef_aus0043_00635	Ef_aus0045_02700	Ef_aus0053_00626	Ef_aus0055_02011	*	Ef_aus0070_03124 Ef_aus0070_03044	Ef_aus0078_03100 Ef_aus0078_03068	Ef_aus0080_01991	Ef_aus0084_02010
Ef_aus0233_chr_phage-2	2314	putative phage protein	*	Ef_11-9295564_00557	*	Ef_32605238_00674	Ef_524685928_03015	Ef_9150823H_00533	Ef_aesops12030_00705	Ef_aesops12035_00809	Ef_aesops12037_00506	Ef_aesops12038_00594	Ef_aesops12041_00483	Ef_aesops12057_00717	Ef_aesops12062_00603	Ef_aesops13004_00609	Ef_aesops13028_00455	Ef_aesops13032_00582	Ef_aesops13034_00809	Ef_aus0002_00572	Ef_aus0003_01946	aus0004_chr_p1-3.fna_01441 aus0004_chr_p1-3.fna_00848	*	Ef_aus0006_02868	Ef_aus0007_02852	*	*	Ef_aus0012_00321	Ef_aus0014_00005	Ef_aus0015_00446	Ef_aus0016_00190	Ef_aus0019_02155	Ef_aus0021_02894	Ef_aus0023_00329	Ef_aus0025_00681	Ef_aus0026_00313	*	*	*	Ef_aus0041_02838	Ef_aus0043_00634	Ef_aus0045_02701	Ef_aus0053_00625	*	*	Ef_aus0070_03045	Ef_aus0078_03099	Ef_aus0080_01992	*
Ef_aus0233_chr_phage-2	1320	hypothetical protein	*	Ef_11-9295564_00556	*	Ef_32605238_00675	Ef_524685928_03016	Ef_9150823H_00532	Ef_aesops12030_00706	Ef_aesops12035_01512 Ef_aesops12035_00810	Ef_aesops12037_00505	Ef_aesops12038_00593	Ef_aesops12041_00482	Ef_aesops12057_00718	Ef_aesops12062_00602	Ef_aesops13004_00608	Ef_aesops13028_00454	Ef_aesops13032_00581	Ef_aesops13034_01482 Ef_aesops13034_00810	Ef_aus0002_00571	Ef_aus0003_01945	aus0004_chr_p1-3.fna_01440 aus0004_chr_p1-3.fna_00849 aus0004_chr_p1-3.fna_02404	*	*	*	*	Ef_aus0010_02284	Ef_aus0012_00322	Ef_aus0014_00004	Ef_aus0015_00447	Ef_aus0016_00191	Ef_aus0019_02156 Ef_aus0019_02067	Ef_aus0021_02895	Ef_aus0023_00328	Ef_aus0025_00680	Ef_aus0026_00312	Ef_aus0029_03090	Ef_aus0031_02763	Ef_aus0038_02692	Ef_aus0041_02839	Ef_aus0043_00633 Ef_aus0043_00625	Ef_aus0045_02702	*	Ef_aus0055_03082	*	Ef_aus0070_03046	*	Ef_aus0080_01993	Ef_aus0084_02012
Ef_aus0233_chr_phage-2	1319	putative holin	*	Ef_11-9295564_00555	*	Ef_32605238_00676	Ef_524685928_03017	Ef_9150823H_00531	Ef_aesops12030_00707	Ef_aesops12035_01513 Ef_aesops12035_00811	Ef_aesops12037_00504	Ef_aesops12038_00592	Ef_aesops12041_00481	Ef_aesops12057_00719	Ef_aesops12062_00601	Ef_aesops13004_00607	Ef_aesops13028_00453	Ef_aesops13032_00580	Ef_aesops13034_01483 Ef_aesops13034_00811	Ef_aus0002_00570	Ef_aus0003_01944	aus0004_chr_p1-3.fna_02403	*	Ef_aus0006_02901	Ef_aus0007_02892	*	*	Ef_aus0012_00323	Ef_aus0014_00003	Ef_aus0015_00448	Ef_aus0016_00192	Ef_aus0019_02157	Ef_aus0021_02896	Ef_aus0023_00327	*	*	Ef_aus0029_03089	Ef_aus0031_02764	Ef_aus0038_02693	Ef_aus0041_02840	Ef_aus0043_00632 Ef_aus0043_00626	Ef_aus0045_02703	Ef_aus0053_02977	Ef_aus0055_03081	*	Ef_aus0070_03047	Ef_aus0078_03122	Ef_aus0080_01994	Ef_aus0084_02013
Ef_aus0233_chr_phage-2	2446	N-acetylmuramoyl-L-alanine amidase	*	Ef_11-9295564_00554	*	Ef_32605238_00677	Ef_524685928_03018	Ef_9150823H_00530	Ef_aesops12030_00708	Ef_aesops12035_00812	Ef_aesops12037_00503	Ef_aesops12038_00591	Ef_aesops12041_00480	Ef_aesops12057_00720	Ef_aesops12062_00600	Ef_aesops13004_00606	Ef_aesops13028_00452	Ef_aesops13032_00579	Ef_aesops13034_00812	Ef_aus0002_00569	Ef_aus0003_01943	*	*	Ef_aus0006_02877	Ef_aus0007_02858	Ef_aus0009_01177	*	Ef_aus0012_00324	Ef_aus0014_00002	Ef_aus0015_00449	Ef_aus0016_00193	*	Ef_aus0021_02897	Ef_aus0023_00326	*	*	*	Ef_aus0031_02765	Ef_aus0038_02719	Ef_aus0041_02841	Ef_aus0043_00631	Ef_aus0045_02704	Ef_aus0053_02884	*	Ef_aus0065_02717	Ef_aus0070_03048	Ef_aus0078_03072	Ef_aus0080_01995	Ef_aus0084_02014
Ef_aus0233_chr_phage-2	2190	ISEfa8 transposase	Ef_04112313871_02970	*	*	*	*	*	Ef_aesops12030_02715	Ef_aesops12035_02778	*	*	Ef_aesops12041_02808	Ef_aesops12057_02820	*	Ef_aesops13004_01646	*	*	Ef_aesops13034_02854	*	Ef_aus0003_02742 Ef_aus0003_02704 Ef_aus0003_01941	aus0004_chr_p1-3.fna_01436 aus0004_chr_p1-3.fna_00853	*	*	*	Ef_aus0009_02738	Ef_aus0010_02712	*	*	Ef_aus0015_00451	*	*	*	*	Ef_aus0025_02806	*	*	Ef_aus0031_02791	Ef_aus0038_02673	*	*	*	*	*	*	*	*	*	*
Ef_aus0233_chr_phage-2	2191	ISEfa8 transposase	Ef_04112313871_02971	Ef_11-9295564_02813 Ef_11-9295564_02811 Ef_11-9295564_02769 Ef_11-9295564_01757	Ef_11282884_02845	Ef_32605238_02846	Ef_524685928_03096	Ef_9150823H_03062	Ef_aesops12030_02930 Ef_aesops12030_02912 Ef_aesops12030_01892	Ef_aesops12035_02884 Ef_aesops12035_02821	Ef_aesops12037_02922	Ef_aesops12038_02931	Ef_aesops12041_02944 Ef_aesops12041_02906	Ef_aesops12057_02793 Ef_aesops12057_02778 Ef_aesops12057_01591	Ef_aesops12062_02927	Ef_aesops13004_01647	Ef_aesops13028_02879	Ef_aesops13032_02834	Ef_aesops13034_02966 Ef_aesops13034_02918 Ef_aesops13034_01877	*	Ef_aus0003_02837	aus0004_chr_p1-3.fna_01435 aus0004_chr_p1-3.fna_00854	*	*	*	Ef_aus0009_02737	*	*	Ef_aus0014_02756	Ef_aus0015_00452	Ef_aus0016_02749	*	Ef_aus0021_02951	Ef_aus0023_02708	Ef_aus0025_02805	Ef_aus0026_02969 Ef_aus0026_02966 Ef_aus0026_02938	Ef_aus0029_03109	Ef_aus0031_02792	Ef_aus0038_02674	Ef_aus0041_03046	Ef_aus0043_02859	Ef_aus0045_02942	Ef_aus0053_02859	Ef_aus0055_03100	*	Ef_aus0070_03087	Ef_aus0078_03027	Ef_aus0080_02684 Ef_aus0080_02327	Ef_aus0084_02821 Ef_aus0084_02775
Ef_aus0233_chr_phage-2	2831	ISEnfa3 transposase	Ef_04112313871_00436	Ef_11-9295564_01758	Ef_11282884_02806	Ef_32605238_02763 Ef_32605238_02485 Ef_32605238_01945	Ef_524685928_00960	Ef_9150823H_01607 Ef_9150823H_02913	Ef_aesops12030_01891	Ef_aesops12035_02405	Ef_aesops12037_01548	Ef_aesops12038_01548	Ef_aesops12041_01473	Ef_aesops12057_02811 Ef_aesops12057_01592	Ef_aesops12062_02196 Ef_aesops12062_02876	Ef_aesops13004_01648	Ef_aesops13028_02085	Ef_aesops13032_02836 Ef_aesops13032_01561	Ef_aesops13034_01876	*	Ef_aus0003_02211	aus0004_chr_p1-3.fna_00019 aus0004_chr_p1-3.fna_01434 aus0004_chr_p1-3.fna_00855	*	*	*	Ef_aus0009_02735	*	*	*	*	*	*	*	*	Ef_aus0025_02909	Ef_aus0026_02950	*	*	*	*	*	*	*	*	*	*	*	*	*
Ef_aus0233_chr_phage-2	2313	hypothetical protein	Ef_04112313871_00437	Ef_11-9295564_01759	Ef_11282884_02807	Ef_32605238_01944	Ef_524685928_00961	Ef_9150823H_01608	Ef_aesops12030_01890	Ef_aesops12035_02404	Ef_aesops12037_01549	Ef_aesops12038_01549	Ef_aesops12041_01474	Ef_aesops12057_01593	Ef_aesops12062_02877	Ef_aesops13004_01649	Ef_aesops13028_02086	Ef_aesops13032_01562	Ef_aesops13034_01875	Ef_aus0002_02643	Ef_aus0003_02210	aus0004_chr_p1-3.fna_01433 aus0004_chr_p1-3.fna_00856	*	Ef_aus0006_02793	Ef_aus0007_02768	*	*	Ef_aus0012_02791	Ef_aus0014_01948	Ef_aus0015_02629	Ef_aus0016_02722	Ef_aus0019_01977	Ef_aus0021_02875	Ef_aus0023_02681	Ef_aus0025_00677	Ef_aus0026_00309	Ef_aus0029_01292	Ef_aus0031_02784	Ef_aus0038_02638	Ef_aus0041_02388	Ef_aus0043_00516	Ef_aus0045_01063	Ef_aus0053_00624	Ef_aus0055_01172	Ef_aus0065_02644	Ef_aus0070_00993	Ef_aus0078_03046	*	Ef_aus0084_02041
Ef_aus0233_chr_phage-2	2312	hypothetical protein	Ef_04112313871_00438	Ef_11-9295564_01760	Ef_11282884_02808	Ef_32605238_01943	Ef_524685928_00962	Ef_9150823H_01609	Ef_aesops12030_01889	Ef_aesops12035_02403	Ef_aesops12037_01550	Ef_aesops12038_01550	Ef_aesops12041_01475	Ef_aesops12057_01594	Ef_aesops12062_02878	Ef_aesops13004_01650	Ef_aesops13028_02087	Ef_aesops13032_01563	Ef_aesops13034_01874	Ef_aus0002_02642	Ef_aus0003_02209	aus0004_chr_p1-3.fna_01432 aus0004_chr_p1-3.fna_00857	*	Ef_aus0006_02794	Ef_aus0007_02769	*	*	Ef_aus0012_02792	Ef_aus0014_01949	Ef_aus0015_02630	Ef_aus0016_02721	Ef_aus0019_01978	Ef_aus0021_02876	Ef_aus0023_02682	Ef_aus0025_00676	Ef_aus0026_00308	Ef_aus0029_01293	Ef_aus0031_02785	Ef_aus0038_02637	Ef_aus0041_02389	Ef_aus0043_00517	Ef_aus0045_01064	Ef_aus0053_00623	Ef_aus0055_01173	Ef_aus0065_02645	Ef_aus0070_00994	Ef_aus0078_03047	*	Ef_aus0084_02042
Ef_aus0233_chr_phage-2	2311	hypothetical protein	Ef_04112313871_00439	Ef_11-9295564_01761	Ef_11282884_02809	Ef_32605238_01942	Ef_524685928_00963	Ef_9150823H_01610	Ef_aesops12030_01888	Ef_aesops12035_02402	Ef_aesops12037_01551	Ef_aesops12038_01551	Ef_aesops12041_01476	Ef_aesops12057_01595	Ef_aesops12062_02879	Ef_aesops13004_01651	Ef_aesops13028_02088	Ef_aesops13032_01564	Ef_aesops13034_01873	Ef_aus0002_02641	Ef_aus0003_02208	aus0004_chr_p1-3.fna_01431 aus0004_chr_p1-3.fna_00858	*	Ef_aus0006_02795	Ef_aus0007_02770	*	*	Ef_aus0012_02793	Ef_aus0014_01950	Ef_aus0015_02631	Ef_aus0016_02720	Ef_aus0019_01979	Ef_aus0021_02877	Ef_aus0023_02683	Ef_aus0025_00675	Ef_aus0026_00307	Ef_aus0029_01294	Ef_aus0031_02786	Ef_aus0038_02636	Ef_aus0041_02390	Ef_aus0043_00518	Ef_aus0045_01065	Ef_aus0053_00622	Ef_aus0055_01174	Ef_aus0065_02646	Ef_aus0070_00995	Ef_aus0078_03048	*	Ef_aus0084_02043
Ef_aus0233_chr_phage-2	1318	hypothetical protein	Ef_04112313871_00362 Ef_04112313871_00440	Ef_11-9295564_02401 Ef_11-9295564_01762	Ef_11282884_02810	Ef_32605238_02353 Ef_32605238_01941	Ef_524685928_00309 Ef_524685928_00964 Ef_524685928_00640	Ef_9150823H_02431 Ef_9150823H_01611	Ef_aesops12030_02525 Ef_aesops12030_02033	Ef_aesops12035_02421 Ef_aesops12035_02401 Ef_aesops12035_02066	Ef_aesops12037_02468 Ef_aesops12037_01552	Ef_aesops12038_02483 Ef_aesops12038_01552	Ef_aesops12041_02461 Ef_aesops12041_01477	Ef_aesops12057_02514 Ef_aesops12057_01596	Ef_aesops12062_02485 Ef_aesops12062_01607	Ef_aesops13004_02626 Ef_aesops13004_01652	Ef_aesops13028_02464 Ef_aesops13028_02089	Ef_aesops13032_02556 Ef_aesops13032_01565	Ef_aesops13034_02354 Ef_aesops13034_01872	Ef_aus0002_02640	Ef_aus0003_02508 Ef_aus0003_02207	aus0004_chr_p1-3.fna_01825 aus0004_chr_p1-3.fna_01430 aus0004_chr_p1-3.fna_00859	Ef_aus0005_00310	Ef_aus0006_02796 Ef_aus0006_02642	Ef_aus0007_02771 Ef_aus0007_02327	Ef_aus0009_02462 Ef_aus0009_01511	Ef_aus0010_02581 Ef_aus0010_02290	Ef_aus0012_02794 Ef_aus0012_02346	Ef_aus0014_02235 Ef_aus0014_01951	Ef_aus0015_02632 Ef_aus0015_02538	Ef_aus0016_02145	Ef_aus0019_01980 Ef_aus0019_02733 Ef_aus0019_02321	Ef_aus0021_02878 Ef_aus0021_02686 Ef_aus0021_02468	Ef_aus0023_02684 Ef_aus0023_02581	Ef_aus0025_02734	Ef_aus0026_02742	Ef_aus0029_03129 Ef_aus0029_03123 Ef_aus0029_02745	Ef_aus0031_02360	Ef_aus0038_02366	Ef_aus0041_03122 Ef_aus0041_02391	Ef_aus0043_00629 Ef_aus0043_00519	Ef_aus0045_03001 Ef_aus0045_01066	Ef_aus0053_02939 Ef_aus0053_02879 Ef_aus0053_00621	Ef_aus0055_03121 Ef_aus0055_03116	Ef_aus0065_02482	Ef_aus0070_03160 Ef_aus0070_02415 Ef_aus0070_00996	Ef_aus0078_03029 Ef_aus0078_03073 Ef_aus0078_02509	Ef_aus0080_01947	Ef_aus0084_02044
Ef_aus0233_chr_phage-3	3887	peptidoglycan-binding protein LysM	*	Ef_11-9295564_00811	*	Ef_32605238_02018	*	Ef_9150823H_01111	Ef_aesops12030_01875	Ef_aesops12035_01994	Ef_aesops12037_02004	Ef_aesops12038_02004	Ef_aesops12041_01926	Ef_aesops12057_01747	Ef_aesops12062_01993	Ef_aesops13004_01875	Ef_aesops13028_01977	Ef_aesops13032_02011	Ef_aesops13034_02024	*	*	*	*	*	*	*	*	*	*	*	*	*	*	*	*	*	*	*	*	*	*	*	*	*	*	*	*	*	*
Ef_aus0233_chr_phage-3	3886	hypothetical protein	*	Ef_11-9295564_00810	*	Ef_32605238_02017	*	Ef_9150823H_01110	Ef_aesops12030_01876	Ef_aesops12035_01995	Ef_aesops12037_02005	Ef_aesops12038_02005	Ef_aesops12041_01927	Ef_aesops12057_01748	Ef_aesops12062_01994	Ef_aesops13004_01874	Ef_aesops13028_01978	Ef_aesops13032_02012	Ef_aesops13034_02023	*	*	*	*	*	*	*	*	*	*	*	*	*	*	*	*	*	*	*	*	*	*	*	*	*	*	*	*	*	*
Ef_aus0233_chr_phage-3	3885	hypothetical protein	*	Ef_11-9295564_00809	*	Ef_32605238_02016	*	Ef_9150823H_01109	Ef_aesops12030_01877	Ef_aesops12035_01996	Ef_aesops12037_02006	Ef_aesops12038_02006	Ef_aesops12041_01928	Ef_aesops12057_01749	Ef_aesops12062_01995	Ef_aesops13004_01873	Ef_aesops13028_01979	Ef_aesops13032_02013	Ef_aesops13034_02022	*	*	*	*	*	*	*	*	*	*	*	*	*	*	*	*	*	*	*	*	*	*	*	*	*	*	*	*	*	*
Ef_aus0233_chr_phage-3	3884	hypothetical protein	*	Ef_11-9295564_00808	*	Ef_32605238_02015	*	Ef_9150823H_01108	Ef_aesops12030_01878	Ef_aesops12035_01997	Ef_aesops12037_02007	Ef_aesops12038_02007	Ef_aesops12041_01929	Ef_aesops12057_01750	Ef_aesops12062_01996	Ef_aesops13004_01872	Ef_aesops13028_01980	Ef_aesops13032_02014	Ef_aesops13034_02021	*	*	*	*	*	*	*	*	*	*	*	*	*	*	*	*	*	*	*	*	*	*	*	*	*	*	*	*	*	*
Ef_aus0233_chr_phage-3	3883	hypothetical protein	*	Ef_11-9295564_00807	*	Ef_32605238_02014	*	Ef_9150823H_01107	Ef_aesops12030_01879	Ef_aesops12035_01998	Ef_aesops12037_02008	Ef_aesops12038_02008	Ef_aesops12041_01930	Ef_aesops12057_01751	Ef_aesops12062_01997	Ef_aesops13004_01871	Ef_aesops13028_01981	Ef_aesops13032_02015	Ef_aesops13034_02020	*	*	*	*	*	*	*	*	*	*	*	*	*	*	*	*	*	*	*	*	*	*	*	*	*	*	*	*	*	*
Ef_aus0233_chr_phage-3	3882	hypothetical protein	*	Ef_11-9295564_00806	*	Ef_32605238_02013	*	Ef_9150823H_01106	Ef_aesops12030_01880	Ef_aesops12035_01999	Ef_aesops12037_02009	Ef_aesops12038_02009	Ef_aesops12041_01931	Ef_aesops12057_01752	Ef_aesops12062_01998	Ef_aesops13004_01870	Ef_aesops13028_01982	Ef_aesops13032_02016	Ef_aesops13034_02019	*	*	*	*	*	*	*	*	*	*	*	*	*	*	*	*	*	*	*	*	*	*	*	*	*	*	*	*	*	*
Ef_aus0233_chr_phage-3	3881	hypothetical protein	*	Ef_11-9295564_00805	*	Ef_32605238_02012	*	Ef_9150823H_01105	Ef_aesops12030_01881	Ef_aesops12035_02000	Ef_aesops12037_02010	Ef_aesops12038_02010	Ef_aesops12041_01932	Ef_aesops12057_01753	Ef_aesops12062_01999	Ef_aesops13004_01869	Ef_aesops13028_01983	Ef_aesops13032_02017	Ef_aesops13034_02018	*	*	*	*	*	*	*	*	*	*	*	*	*	*	*	*	*	*	*	*	*	*	*	*	*	*	*	*	*	*
Ef_aus0233_chr_phage-3	3880	hypothetical protein	*	Ef_11-9295564_00804	*	Ef_32605238_02011	*	Ef_9150823H_01104	Ef_aesops12030_01882	Ef_aesops12035_02001	Ef_aesops12037_02011	Ef_aesops12038_02011	Ef_aesops12041_01933	Ef_aesops12057_01754	Ef_aesops12062_02000	Ef_aesops13004_01868	Ef_aesops13028_01984	Ef_aesops13032_02018	Ef_aesops13034_02017	*	*	*	*	*	*	*	*	*	*	*	*	*	*	*	*	*	*	*	*	*	*	*	*	*	*	*	*	*	*
Ef_aus0233_chr_phage-3	3879	hypothetical protein	*	Ef_11-9295564_00803	*	Ef_32605238_02010	*	Ef_9150823H_01103	Ef_aesops12030_01883	Ef_aesops12035_02002	Ef_aesops12037_02012	Ef_aesops12038_02012	Ef_aesops12041_01934	Ef_aesops12057_01755	Ef_aesops12062_02001	Ef_aesops13004_01867	Ef_aesops13028_01985	Ef_aesops13032_02019	Ef_aesops13034_02016	*	*	*	*	*	*	*	*	*	*	*	*	*	*	*	*	*	*	*	*	*	*	*	*	*	*	*	*	*	*
Ef_aus0233_chr_phage-3	3878	pheromone-responsive regulatory protein PrgR	*	Ef_11-9295564_00802	*	Ef_32605238_02009	*	Ef_9150823H_01101	Ef_aesops12030_01884	Ef_aesops12035_02003	Ef_aesops12037_02013	Ef_aesops12038_02013	Ef_aesops12041_01935	Ef_aesops12057_01756	Ef_aesops12062_02002	Ef_aesops13004_01866	Ef_aesops13028_01986	Ef_aesops13032_02020	Ef_aesops13034_02015	*	*	*	*	*	*	*	*	*	*	*	*	*	*	*	*	*	*	*	*	*	*	*	*	*	*	*	*	*	*
Ef_aus0233_chr_phage-3	3877	Replication initiator protein A	*	Ef_11-9295564_00801	*	Ef_32605238_02008	*	Ef_9150823H_01100	Ef_aesops12030_01885	Ef_aesops12035_02004	Ef_aesops12037_02014	Ef_aesops12038_02014	Ef_aesops12041_01936	Ef_aesops12057_01757	Ef_aesops12062_02003	Ef_aesops13004_01865	Ef_aesops13028_01987	Ef_aesops13032_02021	Ef_aesops13034_02014	*	*	*	*	*	*	*	*	*	*	*	*	*	*	*	*	*	*	*	*	*	*	*	*	*	*	*	*	*	*
Ef_aus0233_chr_phage-3	3876	Replication initiator protein A	*	Ef_11-9295564_00800	*	Ef_32605238_02007	*	Ef_9150823H_01099	Ef_aesops12030_01886	Ef_aesops12035_02005	Ef_aesops12037_02015	Ef_aesops12038_02015	Ef_aesops12041_01937	Ef_aesops12057_01758	Ef_aesops12062_02004	Ef_aesops13004_01864	Ef_aesops13028_01988	Ef_aesops13032_02022	Ef_aesops13034_02013	*	*	*	*	*	*	*	*	*	*	*	*	*	*	*	*	*	*	*	*	*	*	*	*	*	*	*	*	*	*
Ef_aus0233_chr_phage-3	2987	hypothetical protein	*	*	*	*	*	*	Ef_aesops12030_01887	*	*	*	*	*	*	*	*	*	*	*	*	*	*	*	*	*	*	*	*	*	*	*	*	*	*	*	Ef_aus0029_01295	*	*	*	*	*	*	Ef_aus0055_01175	*	*	*	*	*
Ef_aus0233_chr_phage-3	849	N-acetylmuramoyl-L-alanine amidase	Ef_04112313871_02948	Ef_11-9295564_02793	*	Ef_32605238_02795	Ef_524685928_03070	Ef_9150823H_02872	Ef_aesops12030_02933 Ef_aesops12030_01733	Ef_aesops12035_01514	Ef_aesops12037_02879	Ef_aesops12038_02887	Ef_aesops12041_02904	Ef_aesops12057_02789	Ef_aesops12062_02885	Ef_aesops13004_02953	Ef_aesops13028_02847	Ef_aesops13032_02807	Ef_aesops13034_01484	*	*	aus0004_chr_p1-3.fna_02402 aus0004_chr_p1-3.fna_01438 aus0004_chr_p1-3.fna_00851	Ef_aus0005_00556	Ef_aus0006_02878	*	Ef_aus0009_01385	Ef_aus0010_02286	*	*	*	Ef_aus0016_02732	*	Ef_aus0021_02794	*	Ef_aus0025_01272 Ef_aus0025_00678	Ef_aus0026_01242 Ef_aus0026_00310	Ef_aus0029_03088 Ef_aus0029_02109	*	Ef_aus0038_02686	Ef_aus0041_01245	Ef_aus0043_00627	Ef_aus0045_01259	Ef_aus0053_02906	Ef_aus0055_03080 Ef_aus0055_02007	Ef_aus0065_02679	Ef_aus0070_03091 Ef_aus0070_01240	Ef_aus0078_03093	Ef_aus0080_02614 Ef_aus0080_00114	Ef_aus0084_02677
Ef_aus0233_chr_phage-3	3207	holin	*	*	*	*	*	*	Ef_aesops12030_01732	*	*	*	*	*	*	*	*	*	*	Ef_aus0002_02722	*	*	*	*	Ef_aus0007_02838	*	*	*	*	*	*	*	*	*	Ef_aus0025_01271	Ef_aus0026_01241	Ef_aus0029_03161	Ef_aus0031_01125	*	Ef_aus0041_01244	*	Ef_aus0045_01258	*	Ef_aus0055_03144	*	Ef_aus0070_01241	Ef_aus0078_03089	*	*
Ef_aus0233_chr_phage-3	3208	hypothetical protein	*	*	*	*	*	*	Ef_aesops12030_01731	*	*	*	*	*	*	*	*	*	*	Ef_aus0002_02723	*	*	*	*	Ef_aus0007_02839	*	*	*	*	*	*	*	*	*	Ef_aus0025_01270	Ef_aus0026_01240	Ef_aus0029_03162	Ef_aus0031_01124	*	Ef_aus0041_01243	*	Ef_aus0045_01257	*	Ef_aus0055_03145	*	Ef_aus0070_01242	Ef_aus0078_03090	*	*
Ef_aus0233_chr_phage-3	3305	hypothetical protein	*	*	*	*	*	*	Ef_aesops12030_01730	*	*	*	*	*	*	*	*	*	*	Ef_aus0002_02724	*	*	*	*	*	*	*	*	*	*	*	*	*	*	Ef_aus0025_01269	Ef_aus0026_01239	*	Ef_aus0031_01123	*	Ef_aus0041_01242	*	Ef_aus0045_01256	*	*	*	Ef_aus0070_01243	*	*	*
Ef_aus0233_chr_phage-3	3194	hypothetical protein	*	*	*	*	*	*	Ef_aesops12030_01729	Ef_aesops12035_01509	*	*	*	*	*	*	*	*	Ef_aesops13034_01479	*	*	*	*	*	*	*	*	*	*	*	*	*	*	*	Ef_aus0025_01268	Ef_aus0026_01238	Ef_aus0029_03033	Ef_aus0031_01122	*	Ef_aus0041_01241	Ef_aus0043_00622	Ef_aus0045_01255	Ef_aus0053_00518	Ef_aus0055_03029	*	Ef_aus0070_01244	Ef_aus0078_02963	*	*
Ef_aus0233_chr_phage-3	3193	hypothetical protein	*	*	*	*	*	*	Ef_aesops12030_01728	Ef_aesops12035_01508	*	*	*	*	*	*	*	*	Ef_aesops13034_01478	Ef_aus0002_02806	*	*	*	*	Ef_aus0007_02181	*	*	*	*	*	*	*	*	*	Ef_aus0025_01267	Ef_aus0026_01237	Ef_aus0029_03032	Ef_aus0031_01121	*	Ef_aus0041_01240	Ef_aus0043_00621	Ef_aus0045_01254	Ef_aus0053_00519	Ef_aus0055_03028	*	Ef_aus0070_01245	Ef_aus0078_02962	*	*
Ef_aus0233_chr_phage-3	3210	hypothetical protein	*	*	*	*	*	*	Ef_aesops12030_01727	Ef_aesops12035_01507	*	*	*	*	*	*	*	*	Ef_aesops13034_01477	*	*	*	*	*	*	*	*	*	*	*	*	*	*	*	*	*	Ef_aus0029_03169	*	*	Ef_aus0041_01239	*	Ef_aus0045_01253	*	Ef_aus0055_03150	*	Ef_aus0070_01246	Ef_aus0078_03101	*	*
Ef_aus0233_chr_phage-3	3306	hypothetical protein	*	*	*	*	*	*	Ef_aesops12030_01726	Ef_aesops12035_01506	*	*	*	*	*	*	*	*	Ef_aesops13034_01476	*	*	*	*	*	Ef_aus0007_02179	*	*	*	*	*	*	*	*	*	Ef_aus0025_01265	Ef_aus0026_01235	*	Ef_aus0031_01119	*	Ef_aus0041_01238	Ef_aus0043_00619	Ef_aus0045_01252	Ef_aus0053_00521	*	*	Ef_aus0070_01247	*	*	*
Ef_aus0233_chr_phage-3	3192	phage minor structural protein	*	*	*	*	*	*	Ef_aesops12030_01725	Ef_aesops12035_01505	*	*	*	*	*	*	*	*	Ef_aesops13034_01475	*	*	*	*	*	*	*	*	*	*	*	*	*	*	*	*	*	Ef_aus0029_03031	*	*	Ef_aus0041_01237	Ef_aus0043_00618	Ef_aus0045_01251	Ef_aus0053_00522	Ef_aus0055_03027	*	Ef_aus0070_01248	Ef_aus0078_02961	*	*
Ef_aus0233_chr_phage-3	3072	phage putative tail component protein	*	*	*	*	*	*	Ef_aesops12030_01724	Ef_aesops12035_01504	*	*	*	*	*	*	*	*	Ef_aesops13034_01474	*	*	*	*	*	*	*	*	*	*	*	*	*	*	*	*	*	Ef_aus0029_01754	*	*	Ef_aus0041_01236	*	Ef_aus0045_01250	*	Ef_aus0055_01688	*	Ef_aus0070_01249	Ef_aus0078_01591	*	*
Ef_aus0233_chr_phage-3	3071	phage tail tape measure protein TP901 family core region	*	*	*	*	*	*	Ef_aesops12030_01723	Ef_aesops12035_01503	*	*	*	*	*	*	*	*	Ef_aesops13034_01473	*	*	*	*	*	Ef_aus0007_02176	*	*	*	*	*	*	*	*	*	Ef_aus0025_01262	Ef_aus0026_01232	Ef_aus0029_01753	Ef_aus0031_01116	*	Ef_aus0041_01235	*	Ef_aus0045_01249	*	Ef_aus0055_01687	*	Ef_aus0070_01250	Ef_aus0078_01590	*	*
Ef_aus0233_chr_phage-3	3070	hypothetical protein	*	*	*	*	*	*	Ef_aesops12030_01722	Ef_aesops12035_01502	*	*	*	*	*	*	*	*	Ef_aesops13034_01472	*	*	*	*	*	Ef_aus0007_02175	*	*	*	*	*	*	*	*	*	Ef_aus0025_01261	Ef_aus0026_01231	Ef_aus0029_01752	Ef_aus0031_01115	*	Ef_aus0041_01234	*	Ef_aus0045_01248	*	Ef_aus0055_01686	*	Ef_aus0070_01251	Ef_aus0078_01589	*	*
Ef_aus0233_chr_phage-3	3069	phage major tail protein Phi13 family	*	*	*	*	*	*	Ef_aesops12030_01721	Ef_aesops12035_01501	*	*	*	*	*	*	*	*	Ef_aesops13034_01471	*	*	*	*	*	Ef_aus0007_02174	*	*	*	*	*	*	*	*	*	Ef_aus0025_01260	Ef_aus0026_01230	Ef_aus0029_01751	Ef_aus0031_01114	*	Ef_aus0041_01233	*	Ef_aus0045_01247	*	Ef_aus0055_01685	*	Ef_aus0070_01252	Ef_aus0078_01588	*	*
Ef_aus0233_chr_phage-3	3068	hypothetical protein	*	*	*	*	*	*	Ef_aesops12030_01720	Ef_aesops12035_01500	*	*	*	*	*	*	*	*	Ef_aesops13034_01470	*	*	*	*	*	Ef_aus0007_02173	*	*	*	*	*	*	*	*	*	Ef_aus0025_01259	Ef_aus0026_01229	Ef_aus0029_01750	Ef_aus0031_01113	*	Ef_aus0041_01232	*	Ef_aus0045_01246	*	Ef_aus0055_01684	*	Ef_aus0070_01253	Ef_aus0078_01587	*	*
Ef_aus0233_chr_phage-3	3067	hypothetical protein	*	*	*	*	*	*	Ef_aesops12030_01719	Ef_aesops12035_01499	*	*	*	*	*	*	*	*	Ef_aesops13034_01469	Ef_aus0002_02694	*	*	*	*	Ef_aus0007_02172	*	*	*	*	*	*	*	*	*	Ef_aus0025_01258	Ef_aus0026_01228	Ef_aus0029_01749	Ef_aus0031_01112	*	Ef_aus0041_01231	*	Ef_aus0045_01245	*	Ef_aus0055_01683	*	Ef_aus0070_01254	Ef_aus0078_01586	*	*
Ef_aus0233_chr_phage-3	3066	hypothetical protein	*	*	*	*	*	*	Ef_aesops12030_01718	Ef_aesops12035_01498	*	*	*	*	*	*	*	*	Ef_aesops13034_01468	Ef_aus0002_02695	*	*	*	*	Ef_aus0007_02171	*	*	*	*	*	*	*	*	*	Ef_aus0025_01257	Ef_aus0026_01227	Ef_aus0029_01748	Ef_aus0031_01111	*	Ef_aus0041_01230	*	Ef_aus0045_01244	*	Ef_aus0055_01682	*	Ef_aus0070_01255	Ef_aus0078_01585	*	*
Ef_aus0233_chr_phage-3	3065	hypothetical protein	*	*	*	*	*	*	Ef_aesops12030_01717	Ef_aesops12035_01497	*	*	*	*	*	*	*	*	Ef_aesops13034_01467	Ef_aus0002_02696	*	*	*	*	Ef_aus0007_02170	*	*	*	*	*	*	*	*	*	Ef_aus0025_01256	Ef_aus0026_01226	Ef_aus0029_01747	Ef_aus0031_01110	*	Ef_aus0041_01229	*	Ef_aus0045_01243	*	Ef_aus0055_01681	*	Ef_aus0070_01256	Ef_aus0078_01584	*	*
Ef_aus0233_chr_phage-3	3064	hypothetical protein	*	*	*	*	*	*	Ef_aesops12030_01716	Ef_aesops12035_01496	*	*	*	*	*	*	*	*	Ef_aesops13034_01466	Ef_aus0002_02697	*	*	*	*	Ef_aus0007_02169	*	*	*	*	*	*	*	*	*	Ef_aus0025_01255	Ef_aus0026_01225	Ef_aus0029_01746	Ef_aus0031_01109	*	Ef_aus0041_01228	*	Ef_aus0045_01242	*	Ef_aus0055_01680	*	Ef_aus0070_01257	Ef_aus0078_01583	*	*
Ef_aus0233_chr_phage-3	3063	hypothetical protein	*	*	*	*	*	*	Ef_aesops12030_01715	Ef_aesops12035_01495	*	*	*	*	*	*	*	*	Ef_aesops13034_01465	*	*	*	*	*	Ef_aus0007_02168	*	*	*	*	*	*	*	*	*	Ef_aus0025_01254	Ef_aus0026_01224	Ef_aus0029_01745	Ef_aus0031_01108	*	Ef_aus0041_01227	*	Ef_aus0045_01241	*	Ef_aus0055_01679	*	Ef_aus0070_01258	Ef_aus0078_01582	*	*
Ef_aus0233_chr_phage-3	3062	hypothetical protein	*	*	*	*	*	*	Ef_aesops12030_01714	Ef_aesops12035_01494	*	*	*	*	*	*	*	*	Ef_aesops13034_01464	Ef_aus0002_02726	*	*	*	*	Ef_aus0007_02167	*	*	*	*	*	*	*	*	*	Ef_aus0025_01253	Ef_aus0026_01223	Ef_aus0029_01744	Ef_aus0031_01107	*	Ef_aus0041_01226	*	Ef_aus0045_01240	*	Ef_aus0055_01678	*	Ef_aus0070_01259	Ef_aus0078_01581	*	*
Ef_aus0233_chr_phage-3	3061	hypothetical protein	*	*	*	*	*	*	Ef_aesops12030_01713	Ef_aesops12035_01493	*	*	*	*	*	*	*	*	Ef_aesops13034_01463	Ef_aus0002_02794	*	*	*	*	Ef_aus0007_02166	*	*	*	*	*	*	*	*	*	Ef_aus0025_01252	Ef_aus0026_01222	Ef_aus0029_01743	Ef_aus0031_01106	*	Ef_aus0041_01225	*	Ef_aus0045_01239	*	Ef_aus0055_01677	*	Ef_aus0070_01260	Ef_aus0078_01580	*	*
Ef_aus0233_chr_phage-3	3060	phage head protein	*	*	*	*	*	*	Ef_aesops12030_01712	Ef_aesops12035_01492	*	*	*	*	*	*	*	*	Ef_aesops13034_01462	*	*	*	*	*	*	*	*	*	*	*	*	*	*	*	*	*	Ef_aus0029_01742	*	*	Ef_aus0041_01224	*	Ef_aus0045_01238	*	Ef_aus0055_01676	*	Ef_aus0070_01261	Ef_aus0078_01579	*	*
Ef_aus0233_chr_phage-3	3059	phage portal protein	*	*	*	*	*	*	Ef_aesops12030_01711	Ef_aesops12035_01491	*	*	*	*	*	*	*	*	Ef_aesops13034_01461	*	*	*	*	*	*	*	*	*	*	*	*	*	*	*	*	*	Ef_aus0029_01741	*	*	Ef_aus0041_01223	*	Ef_aus0045_01237	*	Ef_aus0055_01675	*	Ef_aus0070_01262	Ef_aus0078_01578	*	*
Ef_aus0233_chr_phage-3	3058	hypothetical protein	*	*	*	*	*	*	Ef_aesops12030_01710	Ef_aesops12035_01490	*	*	*	*	*	*	*	*	Ef_aesops13034_01460	*	*	*	*	*	*	*	*	*	*	*	*	*	*	*	*	*	Ef_aus0029_01740	*	*	Ef_aus0041_01222	*	Ef_aus0045_01236	*	Ef_aus0055_01674	*	Ef_aus0070_01263	Ef_aus0078_01577	*	*
Ef_aus0233_chr_phage-3	3057	Phage terminase small subunit	*	*	*	*	*	*	Ef_aesops12030_01709	Ef_aesops12035_01489	*	*	*	*	*	*	*	*	Ef_aesops13034_01459	*	*	*	*	*	*	*	*	*	*	*	*	*	*	*	*	*	Ef_aus0029_01739	*	*	Ef_aus0041_01221	*	Ef_aus0045_01235	*	Ef_aus0055_01673	*	Ef_aus0070_01264	Ef_aus0078_01576	*	*
Ef_aus0233_chr_phage-3	3056	hypothetical protein	*	*	*	*	*	*	Ef_aesops12030_01708	Ef_aesops12035_01488	*	*	*	*	*	*	*	*	Ef_aesops13034_01458	Ef_aus0002_02761	*	*	*	*	*	*	*	*	*	*	*	*	*	*	*	*	Ef_aus0029_01738	*	*	Ef_aus0041_01220	*	Ef_aus0045_01234	*	Ef_aus0055_01672	*	Ef_aus0070_01265	Ef_aus0078_01575	*	*
Ef_aus0233_chr_phage-3	3055	hypothetical protein	*	*	*	*	*	*	Ef_aesops12030_01707	Ef_aesops12035_01487	*	*	*	*	*	*	*	*	Ef_aesops13034_01457	Ef_aus0002_02762	*	*	*	*	*	*	Ef_aus0010_02260	*	*	*	*	*	*	*	*	*	Ef_aus0029_01737	*	*	Ef_aus0041_01219	*	Ef_aus0045_01233	*	Ef_aus0055_01671	*	Ef_aus0070_01266	Ef_aus0078_01574	*	*
Ef_aus0233_chr_phage-3	3054	hypothetical protein	*	*	*	*	*	*	Ef_aesops12030_01706	Ef_aesops12035_01486	*	*	*	*	*	*	*	*	Ef_aesops13034_01456	*	*	*	*	*	*	Ef_aus0009_01150	*	*	*	*	*	Ef_aus0019_02043	*	*	*	*	Ef_aus0029_01736	*	*	Ef_aus0041_01218	*	Ef_aus0045_01232	*	Ef_aus0055_01670	*	Ef_aus0070_01267	Ef_aus0078_01573	*	*
Ef_aus0233_chr_phage-3	851	phage transcriptional regulator ArpU family	Ef_04112313871_02073	Ef_11-9295564_00580	Ef_11282884_00606	Ef_32605238_00651	Ef_524685928_03112	Ef_9150823H_00556	Ef_aesops12030_01703 Ef_aesops12030_00682	Ef_aesops12035_00786	Ef_aesops12037_00529	Ef_aesops12038_00617	Ef_aesops12041_00506	Ef_aesops12057_00694	Ef_aesops12062_00626	Ef_aesops13004_00632	Ef_aesops13028_00478	Ef_aesops13032_00605	Ef_aesops13034_00786	Ef_aus0002_00595	Ef_aus0003_01969	aus0004_chr_p1-3.fna_01464 aus0004_chr_p1-3.fna_00825	*	Ef_aus0006_02677	Ef_aus0007_02688 Ef_aus0007_02159	*	Ef_aus0010_01046	Ef_aus0012_00298	Ef_aus0014_00028	Ef_aus0015_00423	Ef_aus0016_00167	Ef_aus0019_02672	Ef_aus0021_02182 Ef_aus0021_01974	Ef_aus0023_00352	Ef_aus0025_01245	Ef_aus0026_01215	Ef_aus0029_02078 Ef_aus0029_01733	Ef_aus0031_01099 Ef_aus0031_00021	Ef_aus0038_00120	Ef_aus0041_02975 Ef_aus0041_01215	*	Ef_aus0045_02642 Ef_aus0045_01229	Ef_aus0053_02898	Ef_aus0055_02038 Ef_aus0055_01667	Ef_aus0065_02439	Ef_aus0070_01270	Ef_aus0078_01570 Ef_aus0078_01431	Ef_aus0080_00088	*
Ef_aus0233_chr_phage-3	3087	hypothetical protein	*	*	*	*	*	*	*	*	*	*	*	*	*	*	*	*	*	*	*	*	*	*	*	Ef_aus0009_01413	*	*	*	*	*	*	*	*	*	*	Ef_aus0029_02077	*	*	*	*	Ef_aus0045_02643	*	Ef_aus0055_02039	*	Ef_aus0070_01892	Ef_aus0078_01432	*	*
Ef_aus0233_chr_phage-3	3052	ArpT protein	Ef_04112313871_02589 Ef_04112313871_02074	*	Ef_11282884_01953 Ef_11282884_00607	*	Ef_524685928_02719 Ef_524685928_01990	*	Ef_aesops12030_01702	*	*	*	*	*	*	*	*	*	*	*	*	*	Ef_aus0005_00527	*	*	Ef_aus0009_01414 Ef_aus0009_01144	Ef_aus0010_02256	*	*	*	*	Ef_aus0019_02620	Ef_aus0021_01972	*	Ef_aus0025_01243	Ef_aus0026_01213	Ef_aus0029_01732 Ef_aus0029_02076	Ef_aus0031_01097 Ef_aus0031_00022	Ef_aus0038_01945 Ef_aus0038_00121	Ef_aus0041_01214	*	Ef_aus0045_01228	Ef_aus0053_02949	Ef_aus0055_02040 Ef_aus0055_01666	Ef_aus0065_02438 Ef_aus0065_01726	Ef_aus0070_01891 Ef_aus0070_01271	Ef_aus0078_01433 Ef_aus0078_01569	*	*
Ef_aus0233_chr_phage-3	3086	hypothetical protein	*	*	*	*	*	*	*	*	*	*	*	*	*	*	*	*	*	*	*	*	*	*	*	*	*	*	*	*	*	*	*	*	*	*	Ef_aus0029_02075	*	*	*	*	*	*	Ef_aus0055_02041	*	Ef_aus0070_01890	Ef_aus0078_01434	*	*
Ef_aus0233_chr_phage-3	3085	hypothetical protein	*	*	*	*	*	*	*	*	*	*	*	*	*	*	*	*	*	*	*	*	*	*	*	*	*	*	*	*	*	*	*	*	*	*	Ef_aus0029_02074	*	*	*	*	*	*	Ef_aus0055_02042	*	Ef_aus0070_01889	Ef_aus0078_01435	*	*
Ef_aus0233_chr_phage-3	2984	MazG nucleotide pyrophosphohydrolase domain protein	Ef_04112313871_02591	*	Ef_11282884_01951	*	Ef_524685928_01988	*	*	*	*	*	*	*	*	*	*	*	*	*	*	*	Ef_aus0005_00525	*	*	*	*	*	*	*	*	*	Ef_aus0021_01965	*	*	*	Ef_aus0029_00028 Ef_aus0029_02073	*	Ef_aus0038_01947	*	Ef_aus0043_00592	*	Ef_aus0053_00548	Ef_aus0055_02043 Ef_aus0055_00028	Ef_aus0065_01724	Ef_aus0070_01888	Ef_aus0078_01436 Ef_aus0078_00845	*	*
Ef_aus0233_chr_phage-3	3359	hypothetical protein	Ef_04112313871_02594	*	Ef_11282884_01948	*	Ef_524685928_01985	*	*	*	*	*	*	*	*	*	*	*	*	*	*	*	*	*	Ef_aus0007_01842	*	*	*	*	*	*	*	*	*	Ef_aus0025_01237	Ef_aus0026_01207	*	Ef_aus0031_01091	Ef_aus0038_01950	*	*	*	*	*	Ef_aus0065_01721	*	*	*	*
Ef_aus0233_chr_phage-3	3358	SPFH domain / Band 7 family protein	Ef_04112313871_02595	*	Ef_11282884_01947	*	Ef_524685928_01984	*	*	*	*	*	*	*	*	*	*	*	*	*	*	*	*	*	Ef_aus0007_01841	*	*	*	*	*	*	*	*	*	Ef_aus0025_01236	Ef_aus0026_01206	*	Ef_aus0031_01090	Ef_aus0038_01951	*	*	*	*	*	Ef_aus0065_01720	*	*	*	*
Ef_aus0233_chr_phage-3	3401	hypothetical protein	*	*	*	*	*	*	*	*	*	*	*	*	*	*	*	*	*	*	*	*	*	*	Ef_aus0007_01840	*	*	*	*	*	*	*	*	*	Ef_aus0025_01235	Ef_aus0026_01205	*	Ef_aus0031_01089	*	*	*	*	*	*	*	*	*	*	*
Ef_aus0233_chr_phage-3	1723	hypothetical protein	Ef_04112313871_02082	Ef_11-9295564_00587	Ef_11282884_00615	Ef_32605238_00644	Ef_524685928_02711 Ef_524685928_02163	Ef_9150823H_00563	Ef_aesops12030_01693 Ef_aesops12030_00675	Ef_aesops12035_00779	Ef_aesops12037_00536	Ef_aesops12038_00624	Ef_aesops12041_00513	Ef_aesops12057_00687	Ef_aesops12062_00633	Ef_aesops13004_00639	Ef_aesops13028_00485	Ef_aesops13032_00612	Ef_aesops13034_00779	Ef_aus0002_00602	Ef_aus0003_01976	aus0004_chr_p1-3.fna_01471 aus0004_chr_p1-3.fna_00818	Ef_aus0005_00522	Ef_aus0006_02684	Ef_aus0007_01839 Ef_aus0007_02695	Ef_aus0009_01424 Ef_aus0009_01140	Ef_aus0010_01032	Ef_aus0012_00291	Ef_aus0014_00035	Ef_aus0015_00416	Ef_aus0016_00160	Ef_aus0019_02669 Ef_aus0019_02651	Ef_aus0021_02175 Ef_aus0021_01961	Ef_aus0023_00359	Ef_aus0025_01234 Ef_aus0025_00716	Ef_aus0026_01204 Ef_aus0026_00348	Ef_aus0029_02071	Ef_aus0031_01088 Ef_aus0031_00030	Ef_aus0038_00127	Ef_aus0041_01101 Ef_aus0041_01459	Ef_aus0043_00662	Ef_aus0045_02862 Ef_aus0045_02654	Ef_aus0053_00653	Ef_aus0055_02045	Ef_aus0065_02430	Ef_aus0070_03170 Ef_aus0070_01886 Ef_aus0070_01069	Ef_aus0078_00792 Ef_aus0078_01438	Ef_aus0080_02188 Ef_aus0080_00081	Ef_aus0084_02269 Ef_aus0084_00275
Ef_aus0233_chr_phage-3	3176	VRR-NUC domain protein	*	*	*	*	*	*	Ef_aesops12030_01692	*	*	*	*	*	*	*	*	*	*	*	*	*	*	*	*	Ef_aus0009_01425	*	*	*	*	*	*	*	*	*	*	Ef_aus0029_02914	*	*	*	*	*	*	Ef_aus0055_02046	*	*	*	*	*
Ef_aus0233_chr_phage-3	3175	phage DNA polymerase	*	*	*	*	*	*	Ef_aesops12030_01691	*	*	*	*	*	*	*	*	*	*	*	*	*	*	*	*	Ef_aus0009_01426	*	*	*	*	*	*	*	*	*	*	Ef_aus0029_02913	*	*	*	*	*	*	Ef_aus0055_02047	*	*	*	*	*
Ef_aus0233_chr_phage-3	3174	hypothetical protein	*	*	*	*	*	*	Ef_aesops12030_01690	*	*	*	*	*	*	*	*	*	*	*	*	*	*	*	*	Ef_aus0009_01427	*	*	*	*	*	*	*	*	*	*	Ef_aus0029_02912	*	*	*	*	*	*	Ef_aus0055_02048	*	*	*	*	*
Ef_aus0233_chr_phage-3	3173	putative helicase	*	*	*	*	*	*	Ef_aesops12030_01689	*	*	*	*	*	*	*	*	*	*	*	*	*	*	*	*	Ef_aus0009_01428	*	*	*	*	*	*	*	*	*	*	Ef_aus0029_02911	*	*	*	*	*	*	Ef_aus0055_02049	*	*	*	*	*
Ef_aus0233_chr_phage-3	3172	phage nucleotide-binding protein	*	*	*	*	*	*	Ef_aesops12030_01688	*	*	*	*	*	*	*	*	*	*	*	*	*	*	*	*	*	*	*	*	*	*	*	*	*	*	*	Ef_aus0029_02910	*	*	*	*	*	*	Ef_aus0055_02050	*	*	*	*	*
Ef_aus0233_chr_phage-3	3084	Siphovirus Gp157	*	*	*	*	*	*	Ef_aesops12030_01687	*	*	*	*	*	*	*	*	*	*	*	*	*	*	*	*	Ef_aus0009_01430	*	*	*	*	*	*	*	*	*	*	Ef_aus0029_02060 Ef_aus0029_02909	*	*	*	*	*	*	Ef_aus0055_02051	*	Ef_aus0070_01875	Ef_aus0078_01449	*	*
Ef_aus0233_chr_phage-3	3191	hypothetical protein	*	*	*	*	*	*	Ef_aesops12030_01686	*	*	*	*	*	*	*	*	*	*	*	*	*	*	*	*	*	*	*	*	*	*	*	*	*	*	*	Ef_aus0029_02997	*	*	*	*	*	*	Ef_aus0055_02052	*	*	*	*	*
Ef_aus0233_chr_phage-3	3190	Helix-turn-helix domain protein	*	*	*	*	*	*	Ef_aesops12030_01685	*	*	*	*	*	*	*	*	*	*	*	*	*	*	*	*	*	*	*	*	*	*	*	*	*	*	*	Ef_aus0029_02996	*	*	*	*	*	*	Ef_aus0055_02053	*	*	*	*	*
Ef_aus0233_chr_phage-3	3189	hypothetical protein	*	*	*	*	*	*	Ef_aesops12030_01684	*	*	*	*	*	*	*	*	*	*	*	*	*	*	*	*	*	*	*	*	*	*	*	*	*	*	*	Ef_aus0029_02995	*	*	*	*	*	*	Ef_aus0055_02054	*	*	*	*	*
Ef_aus0233_chr_phage-3	3188	helix-turn-helix domain-containing protein	*	*	*	*	*	*	Ef_aesops12030_01683	*	*	*	*	*	*	*	*	*	*	*	*	*	*	*	*	*	*	*	*	*	*	*	*	*	*	*	Ef_aus0029_02994	*	*	*	*	*	*	Ef_aus0055_02055	*	*	*	*	*
Ef_aus0233_chr_phage-3	3187	putative Zn peptidase	*	*	*	*	*	*	Ef_aesops12030_01682	*	*	*	*	*	*	*	*	*	*	*	*	*	*	*	*	Ef_aus0009_01435	*	*	*	*	*	*	Ef_aus0021_00761	*	Ef_aus0025_00733	Ef_aus0026_00365	Ef_aus0029_02993	*	Ef_aus0038_00142	*	*	Ef_aus0045_01121	*	Ef_aus0055_02056	*	*	*	*	*
Ef_aus0233_chr_phage-3	3186	hypothetical protein	*	*	*	*	*	*	Ef_aesops12030_01681	*	*	*	*	*	*	*	*	*	*	*	*	*	*	*	*	*	*	*	*	*	*	*	Ef_aus0021_00760	*	Ef_aus0025_00734	Ef_aus0026_00366	Ef_aus0029_02992	*	Ef_aus0038_00143	*	*	Ef_aus0045_01120	Ef_aus0053_02990	Ef_aus0055_02057	*	*	*	*	*
Ef_aus0233_chr_phage-3	3185	site-specific tyrosine recombinase XerC-family protein	*	*	*	*	*	*	Ef_aesops12030_01680	*	*	*	*	*	*	*	*	*	*	*	*	*	*	*	*	*	*	*	*	*	*	*	*	*	*	*	Ef_aus0029_02991	*	*	*	*	*	*	Ef_aus0055_02058	*	*	*	*	*
Ef_aus0233_chr_phage-3	2263	Integrase	Ef_04112313871_02978	*	Ef_11282884_02849	*	Ef_524685928_03104	*	*	*	*	*	*	*	*	*	*	*	*	*	Ef_aus0003_02829	aus0004_chr_p1-3.fna_02471 aus0004_chr_p1-3.fna_02221 aus0004_chr_p1-3.fna_01985 aus0004_chr_p1-3.fna_01873 aus0004_chr_p1-3.fna_01800 aus0004_chr_p1-3.fna_01557 aus0004_chr_p1-3.fna_01388 aus0004_chr_p1-3.fna_01270 aus0004_chr_p1-3.fna_01013 aus0004_chr_p1-3.fna_00962 aus0004_chr_p1-3.fna_00692 aus0004_chr_p1-3.fna_00309	Ef_aus0005_02559	Ef_aus0006_02879	Ef_aus0007_02862	*	Ef_aus0010_02719	Ef_aus0012_02860	Ef_aus0014_02759	Ef_aus0015_02669	Ef_aus0016_02754	Ef_aus0019_02737	Ef_aus0021_02957	Ef_aus0023_02711	Ef_aus0025_02914	Ef_aus0026_02959	Ef_aus0029_03167	Ef_aus0031_02810	Ef_aus0038_02706	*	Ef_aus0043_02851	*	*	Ef_aus0055_03149	*	*	Ef_aus0078_03096	*	*
Ef_aus0233_chr_phage-3	2290	bacteriocin-type signal sequence	Ef_04112313871_02467	Ef_11-9295564_02385	Ef_11282884_02352	Ef_32605238_02337	Ef_524685928_02444	Ef_9150823H_02415	Ef_aesops12030_02509	Ef_aesops12035_02385	*	Ef_aesops12038_02433	Ef_aesops12041_02425	Ef_aesops12057_02498	Ef_aesops12062_02470	Ef_aesops13004_02591	Ef_aesops13028_02448	Ef_aesops13032_02540	Ef_aesops13034_02324	Ef_aus0002_02750	Ef_aus0003_02453	aus0004_chr_p1-3.fna_02472	Ef_aus0005_01273	Ef_aus0006_02304	Ef_aus0007_02326	Ef_aus0009_00627	Ef_aus0010_01439	Ef_aus0012_02328	*	Ef_aus0015_02309	Ef_aus0016_02125	Ef_aus0019_02268	Ef_aus0021_02963	Ef_aus0023_02281	Ef_aus0025_02403	Ef_aus0026_02340	Ef_aus0029_01360	Ef_aus0031_02323	Ef_aus0038_02329	Ef_aus0041_01511	Ef_aus0043_02833	Ef_aus0045_01463	Ef_aus0053_01421	Ef_aus0055_01240	Ef_aus0065_02122	Ef_aus0070_00197	Ef_aus0078_00197	Ef_aus0080_02228	Ef_aus0084_02287
Ef_aus0233_chr_phage-3	2372	Enterocin A Immunity protein	*	Ef_11-9295564_02384	*	Ef_32605238_02336	*	Ef_9150823H_02414	Ef_aesops12030_02508	Ef_aesops12035_02384	*	Ef_aesops12038_02432	Ef_aesops12041_02424	Ef_aesops12057_02497	Ef_aesops12062_02469	Ef_aesops13004_02590	Ef_aesops13028_02447	Ef_aesops13032_02539	Ef_aesops13034_02323	*	Ef_aus0003_02452	aus0004_chr_p1-3.fna_02473	Ef_aus0005_01272	Ef_aus0006_02303	Ef_aus0007_02325	Ef_aus0009_00628	Ef_aus0010_01438	Ef_aus0012_02327	Ef_aus0014_02219	Ef_aus0015_02308	Ef_aus0016_02124	Ef_aus0019_02267	*	Ef_aus0023_02280	Ef_aus0025_02402	Ef_aus0026_02339	Ef_aus0029_01361	*	*	Ef_aus0041_01510	*	Ef_aus0045_01462	Ef_aus0053_01422	Ef_aus0055_01241	*	Ef_aus0070_00198	Ef_aus0078_00198	Ef_aus0080_02227	Ef_aus0084_02286
Ef_aus0233_chr_phage-3	2294	Class II bacteriocin	Ef_04112313871_02466	Ef_11-9295564_02383	Ef_11282884_02351	Ef_32605238_02335	Ef_524685928_02443	Ef_9150823H_02413	Ef_aesops12030_02507	Ef_aesops12035_02383	Ef_aesops12037_02452	Ef_aesops12038_02431	Ef_aesops12041_02423	Ef_aesops12057_02496	Ef_aesops12062_02468	Ef_aesops13004_02589	Ef_aesops13028_02446	Ef_aesops13032_02538	Ef_aesops13034_02322	Ef_aus0002_02276	Ef_aus0003_02451	aus0004_chr_p1-3.fna_02474	Ef_aus0005_01271	Ef_aus0006_02302	Ef_aus0007_02324	Ef_aus0009_00629	Ef_aus0010_01437	Ef_aus0012_02326	Ef_aus0014_02218	Ef_aus0015_02307	Ef_aus0016_02123	Ef_aus0019_02266	Ef_aus0021_02438	Ef_aus0023_02279	Ef_aus0025_02401	Ef_aus0026_02338	Ef_aus0029_01362	Ef_aus0031_02322	Ef_aus0038_02328	Ef_aus0041_01509	Ef_aus0043_01374	Ef_aus0045_01461	Ef_aus0053_01423	Ef_aus0055_01242	Ef_aus0065_02121	Ef_aus0070_00199	Ef_aus0078_00199	Ef_aus0080_02226	Ef_aus0084_02285
Ef_aus0233_chr_phage-3	1430	Substrate binding domain of ABC-type glycine betaine transport system	Ef_04112313871_02465	Ef_11-9295564_02382	Ef_11282884_02350	Ef_32605238_02334	Ef_524685928_02442	Ef_9150823H_02412	Ef_aesops12030_02506	Ef_aesops12035_02382	Ef_aesops12037_02451	Ef_aesops12038_02430	Ef_aesops12041_02422	Ef_aesops12057_02495	Ef_aesops12062_02467	Ef_aesops13004_02588	Ef_aesops13028_02445	Ef_aesops13032_02537	Ef_aesops13034_02321	Ef_aus0002_02275	Ef_aus0003_02450	aus0004_chr_p1-3.fna_02475	Ef_aus0005_01270	Ef_aus0006_02301	Ef_aus0007_02323	Ef_aus0009_00630	Ef_aus0010_01436	Ef_aus0012_02325	Ef_aus0014_02217	Ef_aus0015_02306	Ef_aus0016_02122	Ef_aus0019_02265	Ef_aus0021_02437	Ef_aus0023_02278	Ef_aus0025_02400	Ef_aus0026_02337	Ef_aus0029_01363	Ef_aus0031_02321	Ef_aus0038_02327	Ef_aus0041_01508	Ef_aus0043_01375	Ef_aus0045_01460	Ef_aus0053_01424	Ef_aus0055_01243	Ef_aus0065_02120	Ef_aus0070_00200	Ef_aus0078_00200	Ef_aus0080_02225	Ef_aus0084_02284
Ef_aus0233_chr_phage-3	1429	glycine betaine transporter ATP-binding subunit	Ef_04112313871_02464	Ef_11-9295564_02381	Ef_11282884_02349	Ef_32605238_02333	Ef_524685928_02441	Ef_9150823H_02411	Ef_aesops12030_02505	Ef_aesops12035_02381	Ef_aesops12037_02450	Ef_aesops12038_02429	Ef_aesops12041_02421	Ef_aesops12057_02494	Ef_aesops12062_02466	Ef_aesops13004_02587	Ef_aesops13028_02444	Ef_aesops13032_02536	Ef_aesops13034_02320	Ef_aus0002_02274	Ef_aus0003_02449	aus0004_chr_p1-3.fna_02476	Ef_aus0005_01269	Ef_aus0006_02300	Ef_aus0007_02322	Ef_aus0009_00631	Ef_aus0010_01435	Ef_aus0012_02324	Ef_aus0014_02216	Ef_aus0015_02305	Ef_aus0016_02121	Ef_aus0019_02264	Ef_aus0021_02436	Ef_aus0023_02277	Ef_aus0025_02399	Ef_aus0026_02336	Ef_aus0029_01364	Ef_aus0031_02320	Ef_aus0038_02326	Ef_aus0041_01507	Ef_aus0043_01376	Ef_aus0045_01459	Ef_aus0053_01425	Ef_aus0055_01244	Ef_aus0065_02119	Ef_aus0070_00201	Ef_aus0078_00201	Ef_aus0080_02224	Ef_aus0084_02283
Ef_aus0233_chr_phage-3	1428	transcriptional regulator GntR family	Ef_04112313871_02463	Ef_11-9295564_02380	Ef_11282884_02348	Ef_32605238_02332	Ef_524685928_02440	Ef_9150823H_02410	Ef_aesops12030_02504	Ef_aesops12035_02380	Ef_aesops12037_02449	Ef_aesops12038_02428	Ef_aesops12041_02420	Ef_aesops12057_02493	Ef_aesops12062_02465	Ef_aesops13004_02586	Ef_aesops13028_02443	Ef_aesops13032_02535	Ef_aesops13034_02319	Ef_aus0002_02273	Ef_aus0003_02448	aus0004_chr_p1-3.fna_02477	Ef_aus0005_01268	Ef_aus0006_02299	Ef_aus0007_02321	Ef_aus0009_00632	Ef_aus0010_01434	Ef_aus0012_02323	Ef_aus0014_02215	Ef_aus0015_02304	Ef_aus0016_02120	Ef_aus0019_02263	Ef_aus0021_02435	Ef_aus0023_02276	Ef_aus0025_02398	Ef_aus0026_02335	Ef_aus0029_01365	Ef_aus0031_02319	Ef_aus0038_02325	Ef_aus0041_01506	Ef_aus0043_01377	Ef_aus0045_01458	Ef_aus0053_01426	Ef_aus0055_01245	Ef_aus0065_02118	Ef_aus0070_00202	Ef_aus0078_00202	Ef_aus0080_02223	Ef_aus0084_02282
Ef_aus0233_chr_phage-3	1427	hypothetical protein	Ef_04112313871_02462	Ef_11-9295564_02379	Ef_11282884_02347	Ef_32605238_02331	Ef_524685928_02439	Ef_9150823H_02409	Ef_aesops12030_02503	Ef_aesops12035_02379	Ef_aesops12037_02448	Ef_aesops12038_02427	Ef_aesops12041_02419	Ef_aesops12057_02492	Ef_aesops12062_02464	Ef_aesops13004_02585	Ef_aesops13028_02442	Ef_aesops13032_02534	Ef_aesops13034_02318	Ef_aus0002_02272	Ef_aus0003_02447	aus0004_chr_p1-3.fna_02478	Ef_aus0005_01267	Ef_aus0006_02298	Ef_aus0007_02320	Ef_aus0009_00633	Ef_aus0010_01433	Ef_aus0012_02322	Ef_aus0014_02214	Ef_aus0015_02303	Ef_aus0016_02119	Ef_aus0019_02262	Ef_aus0021_02434	Ef_aus0023_02275	Ef_aus0025_02397	Ef_aus0026_02334	Ef_aus0029_01366	Ef_aus0031_02318	Ef_aus0038_02324	Ef_aus0041_01505	Ef_aus0043_01378	Ef_aus0045_01457	Ef_aus0053_01427	Ef_aus0055_01246	Ef_aus0065_02117	Ef_aus0070_00203	Ef_aus0078_00203	Ef_aus0080_02222	Ef_aus0084_02281
Ef_aus0233_chr_phage-3	1426	ferrous iron transport protein B	Ef_04112313871_02461	Ef_11-9295564_02378	Ef_11282884_02346	Ef_32605238_02330	Ef_524685928_02438	Ef_9150823H_02408	Ef_aesops12030_02502	Ef_aesops12035_02378	Ef_aesops12037_02447	Ef_aesops12038_02426	Ef_aesops12041_02418	Ef_aesops12057_02491	Ef_aesops12062_02463	Ef_aesops13004_02584	Ef_aesops13028_02441	Ef_aesops13032_02533	Ef_aesops13034_02317	Ef_aus0002_02271	Ef_aus0003_02446	aus0004_chr_p1-3.fna_02479	Ef_aus0005_01266	Ef_aus0006_02297	Ef_aus0007_02319	Ef_aus0009_00634	Ef_aus0010_01432	Ef_aus0012_02321	Ef_aus0014_02213	Ef_aus0015_02302	Ef_aus0016_02118	Ef_aus0019_02261	Ef_aus0021_02433	Ef_aus0023_02274	Ef_aus0025_02396	Ef_aus0026_02333	Ef_aus0029_01367	Ef_aus0031_02317	Ef_aus0038_02323	Ef_aus0041_01504	Ef_aus0043_01379	Ef_aus0045_01456	Ef_aus0053_01428	Ef_aus0055_01247	Ef_aus0065_02116	Ef_aus0070_00204	Ef_aus0078_00204	Ef_aus0080_02221	Ef_aus0084_02280
Ef_aus0233_chr_phage-3	1425	ferrous iron transport protein A	Ef_04112313871_02460	Ef_11-9295564_02377	Ef_11282884_02345	Ef_32605238_02329	Ef_524685928_02437	Ef_9150823H_02407	Ef_aesops12030_02501	Ef_aesops12035_02377	Ef_aesops12037_02446	Ef_aesops12038_02425	Ef_aesops12041_02417	Ef_aesops12057_02490	Ef_aesops12062_02462	Ef_aesops13004_02583	Ef_aesops13028_02440	Ef_aesops13032_02532	Ef_aesops13034_02316	Ef_aus0002_02270	Ef_aus0003_02445	aus0004_chr_p1-3.fna_02480	Ef_aus0005_01265	Ef_aus0006_02296	Ef_aus0007_02318	Ef_aus0009_00635	Ef_aus0010_01431	Ef_aus0012_02320	Ef_aus0014_02212	Ef_aus0015_02301	Ef_aus0016_02117	Ef_aus0019_02260	Ef_aus0021_02432	Ef_aus0023_02273	Ef_aus0025_02395	Ef_aus0026_02332	Ef_aus0029_01368	Ef_aus0031_02316	Ef_aus0038_02322	Ef_aus0041_01503	Ef_aus0043_01380	Ef_aus0045_01455	Ef_aus0053_01429	Ef_aus0055_01248	Ef_aus0065_02115	Ef_aus0070_00205	Ef_aus0078_00205	Ef_aus0080_02220	Ef_aus0084_02279
Ef_aus0233_chr_phage-3	1424	glutaredoxin	Ef_04112313871_02459	Ef_11-9295564_02376	Ef_11282884_02344	Ef_32605238_02328	Ef_524685928_02436	Ef_9150823H_02406	Ef_aesops12030_02500	Ef_aesops12035_02376	Ef_aesops12037_02445	Ef_aesops12038_02424	Ef_aesops12041_02416	Ef_aesops12057_02489	Ef_aesops12062_02461	Ef_aesops13004_02582	Ef_aesops13028_02439	Ef_aesops13032_02531	Ef_aesops13034_02315	Ef_aus0002_02269	Ef_aus0003_02444	aus0004_chr_p1-3.fna_02481	Ef_aus0005_01264	Ef_aus0006_02295	Ef_aus0007_02317	Ef_aus0009_00636	Ef_aus0010_01430	Ef_aus0012_02319	Ef_aus0014_02211	Ef_aus0015_02300	Ef_aus0016_02116	Ef_aus0019_02259	Ef_aus0021_02431	Ef_aus0023_02272	Ef_aus0025_02394	Ef_aus0026_02331	Ef_aus0029_01369	Ef_aus0031_02315	Ef_aus0038_02321	Ef_aus0041_01502	Ef_aus0043_01381	Ef_aus0045_01454	Ef_aus0053_01430	Ef_aus0055_01249	Ef_aus0065_02114	Ef_aus0070_00206	Ef_aus0078_00206	Ef_aus0080_02219	Ef_aus0084_02278
Ef_aus0233_chr_phage-3	1423	ribonucleoside-diphosphate reductase alpha subunit	Ef_04112313871_02458	Ef_11-9295564_02375	Ef_11282884_02343	Ef_32605238_02327	Ef_524685928_02435	Ef_9150823H_02405	Ef_aesops12030_02499	Ef_aesops12035_02375	Ef_aesops12037_02444	Ef_aesops12038_02423	Ef_aesops12041_02415	Ef_aesops12057_02488	Ef_aesops12062_02460	Ef_aesops13004_02581	Ef_aesops13028_02438	Ef_aesops13032_02530	Ef_aesops13034_02314	Ef_aus0002_02268	Ef_aus0003_02443	aus0004_chr_p1-3.fna_02482	Ef_aus0005_01263	Ef_aus0006_02294	Ef_aus0007_02316	Ef_aus0009_00637	Ef_aus0010_01429	Ef_aus0012_02318	Ef_aus0014_02210	Ef_aus0015_02299	Ef_aus0016_02115	Ef_aus0019_02258	Ef_aus0021_02430	Ef_aus0023_02271	Ef_aus0025_02393	Ef_aus0026_02330	Ef_aus0029_01370	Ef_aus0031_02314	Ef_aus0038_02320	Ef_aus0041_01501	Ef_aus0043_01382	Ef_aus0045_01453	Ef_aus0053_01431	Ef_aus0055_01250	Ef_aus0065_02113	Ef_aus0070_00207	Ef_aus0078_00207	Ef_aus0080_02218	Ef_aus0084_02277
Ef_aus0233_chr_phage-3	1422	ribonucleotide-diphosphate reductase beta subunit	Ef_04112313871_02457	Ef_11-9295564_02374	Ef_11282884_02342	Ef_32605238_02326	Ef_524685928_02434	Ef_9150823H_02404	Ef_aesops12030_02498	Ef_aesops12035_02374	Ef_aesops12037_02443	Ef_aesops12038_02422	Ef_aesops12041_02414	Ef_aesops12057_02487	Ef_aesops12062_02459	Ef_aesops13004_02580	Ef_aesops13028_02437	Ef_aesops13032_02529	Ef_aesops13034_02313	Ef_aus0002_02267	Ef_aus0003_02442	aus0004_chr_p1-3.fna_02483	Ef_aus0005_01262	Ef_aus0006_02293	Ef_aus0007_02315	Ef_aus0009_00638	Ef_aus0010_01428	Ef_aus0012_02317	Ef_aus0014_02209	Ef_aus0015_02298	Ef_aus0016_02114	Ef_aus0019_02257	Ef_aus0021_02429	Ef_aus0023_02270	Ef_aus0025_02392	Ef_aus0026_02329	Ef_aus0029_01371	Ef_aus0031_02313	Ef_aus0038_02319	Ef_aus0041_01500	Ef_aus0043_01383	Ef_aus0045_01452	Ef_aus0053_01432	Ef_aus0055_01251	Ef_aus0065_02112	Ef_aus0070_00208	Ef_aus0078_00208	Ef_aus0080_02217	Ef_aus0084_02276
Ef_aus0233_chr_phage-3	1421	pheromone autoinducer 2 transporter	Ef_04112313871_02456	Ef_11-9295564_02373	Ef_11282884_02341	Ef_32605238_02325	Ef_524685928_02433	Ef_9150823H_02403	Ef_aesops12030_02497	Ef_aesops12035_02373	Ef_aesops12037_02442	Ef_aesops12038_02421	Ef_aesops12041_02413	Ef_aesops12057_02486	Ef_aesops12062_02458	Ef_aesops13004_02579	Ef_aesops13028_02436	Ef_aesops13032_02528	Ef_aesops13034_02312	Ef_aus0002_02266	Ef_aus0003_02441	aus0004_chr_p1-3.fna_02484	Ef_aus0005_01261	Ef_aus0006_02292	Ef_aus0007_02314	Ef_aus0009_00639	Ef_aus0010_01427	Ef_aus0012_02316	Ef_aus0014_02208	Ef_aus0015_02297	Ef_aus0016_02113	Ef_aus0019_02256	Ef_aus0021_02428	Ef_aus0023_02269	Ef_aus0025_02391	Ef_aus0026_02328	Ef_aus0029_01372	Ef_aus0031_02312	Ef_aus0038_02318	Ef_aus0041_01499	Ef_aus0043_01384	Ef_aus0045_01451	Ef_aus0053_01433	Ef_aus0055_01252	Ef_aus0065_02111	Ef_aus0070_00209	Ef_aus0078_00209	Ef_aus0080_02216	Ef_aus0084_02275
Ef_aus0233_chr_phage-4	3624	hypothetical protein	Ef_04112313871_00442	Ef_11-9295564_00724	Ef_11282884_00696	Ef_32605238_02354	Ef_524685928_00642	Ef_9150823H_00951	Ef_aesops12030_00890	Ef_aesops12035_02442	Ef_aesops12037_00949	Ef_aesops12038_00950	Ef_aesops12041_00746	Ef_aesops12057_00901	Ef_aesops12062_00958	Ef_aesops13004_02627	Ef_aesops13028_00912	Ef_aesops13032_00944	Ef_aesops13034_01039	*	*	*	Ef_aus0005_00311	*	*	*	Ef_aus0010_02582	*	Ef_aus0014_00898	*	Ef_aus0016_00828	Ef_aus0019_02734	Ef_aus0021_02687	*	*	*	Ef_aus0029_02746 Ef_aus0029_03124	Ef_aus0031_00766	Ef_aus0038_02728	*	Ef_aus0043_00630	*	Ef_aus0053_02880	Ef_aus0055_03117	Ef_aus0065_02731	Ef_aus0070_00603 Ef_aus0070_02416	Ef_aus0078_03074 Ef_aus0078_00918 Ef_aus0078_02508	Ef_aus0080_02279	Ef_aus0084_00890
Ef_aus0233_chr_phage-4	2248	IS16/IS256 transposase	Ef_04112313871_00441	Ef_11-9295564_02804	Ef_11282884_02837	Ef_32605238_02803	Ef_524685928_00641	Ef_9150823H_02898	Ef_aesops12030_02951	Ef_aesops12035_02903	Ef_aesops12037_02902	Ef_aesops12038_02912	Ef_aesops12041_02924	Ef_aesops12057_02809	Ef_aesops12062_02907	Ef_aesops13004_02957	Ef_aesops13028_02857	Ef_aesops13032_02826	Ef_aesops13034_02941	Ef_aus0002_02692	Ef_aus0003_02813	aus0004_chr_p1-3.fna_02731 aus0004_chr_p1-3.fna_02398 aus0004_chr_p1-3.fna_01920	*	Ef_aus0006_02855	Ef_aus0007_02841	*	*	Ef_aus0012_02848	Ef_aus0014_02751	Ef_aus0015_02650	Ef_aus0016_02729	Ef_aus0019_02721	Ef_aus0021_02940	Ef_aus0023_02706	Ef_aus0025_02906	Ef_aus0026_02946	Ef_aus0029_03142	Ef_aus0031_02801	Ef_aus0038_02685	Ef_aus0041_03089	Ef_aus0043_02847	Ef_aus0045_02961	Ef_aus0053_02876	Ef_aus0055_03131	Ef_aus0065_02689	Ef_aus0070_03115	Ef_aus0078_03063	Ef_aus0080_02701	Ef_aus0084_02794
Ef_aus0233_chr_phage-4	1318	hypothetical protein	Ef_04112313871_00362 Ef_04112313871_00440	Ef_11-9295564_02401 Ef_11-9295564_01762	Ef_11282884_02810	Ef_32605238_02353 Ef_32605238_01941	Ef_524685928_00309 Ef_524685928_00964 Ef_524685928_00640	Ef_9150823H_02431 Ef_9150823H_01611	Ef_aesops12030_02525 Ef_aesops12030_02033	Ef_aesops12035_02421 Ef_aesops12035_02401 Ef_aesops12035_02066	Ef_aesops12037_02468 Ef_aesops12037_01552	Ef_aesops12038_02483 Ef_aesops12038_01552	Ef_aesops12041_02461 Ef_aesops12041_01477	Ef_aesops12057_02514 Ef_aesops12057_01596	Ef_aesops12062_02485 Ef_aesops12062_01607	Ef_aesops13004_02626 Ef_aesops13004_01652	Ef_aesops13028_02464 Ef_aesops13028_02089	Ef_aesops13032_02556 Ef_aesops13032_01565	Ef_aesops13034_02354 Ef_aesops13034_01872	Ef_aus0002_02640	Ef_aus0003_02508 Ef_aus0003_02207	aus0004_chr_p1-3.fna_01825 aus0004_chr_p1-3.fna_01430 aus0004_chr_p1-3.fna_00859	Ef_aus0005_00310	Ef_aus0006_02796 Ef_aus0006_02642	Ef_aus0007_02771 Ef_aus0007_02327	Ef_aus0009_02462 Ef_aus0009_01511	Ef_aus0010_02581 Ef_aus0010_02290	Ef_aus0012_02794 Ef_aus0012_02346	Ef_aus0014_02235 Ef_aus0014_01951	Ef_aus0015_02632 Ef_aus0015_02538	Ef_aus0016_02145	Ef_aus0019_01980 Ef_aus0019_02733 Ef_aus0019_02321	Ef_aus0021_02878 Ef_aus0021_02686 Ef_aus0021_02468	Ef_aus0023_02684 Ef_aus0023_02581	Ef_aus0025_02734	Ef_aus0026_02742	Ef_aus0029_03129 Ef_aus0029_03123 Ef_aus0029_02745	Ef_aus0031_02360	Ef_aus0038_02366	Ef_aus0041_03122 Ef_aus0041_02391	Ef_aus0043_00629 Ef_aus0043_00519	Ef_aus0045_03001 Ef_aus0045_01066	Ef_aus0053_02939 Ef_aus0053_02879 Ef_aus0053_00621	Ef_aus0055_03121 Ef_aus0055_03116	Ef_aus0065_02482	Ef_aus0070_03160 Ef_aus0070_02415 Ef_aus0070_00996	Ef_aus0078_03029 Ef_aus0078_03073 Ef_aus0078_02509	Ef_aus0080_01947	Ef_aus0084_02044
Ef_aus0233_chr_phage-4	2246	ISL3 family transposase	Ef_04112313871_02965 Ef_04112313871_02964	Ef_11-9295564_02802 Ef_11-9295564_02801	Ef_11282884_02836	Ef_32605238_02800 Ef_32605238_02799	Ef_524685928_03088 Ef_524685928_00471	Ef_9150823H_02893 Ef_9150823H_02892	Ef_aesops12030_02949	Ef_aesops12035_02901 Ef_aesops12035_02900	Ef_aesops12037_02900 Ef_aesops12037_02899	Ef_aesops12038_02910 Ef_aesops12038_02909	Ef_aesops12041_02922 Ef_aesops12041_02921	Ef_aesops12057_02807	Ef_aesops12062_02905 Ef_aesops12062_02904	Ef_aesops13004_02954	Ef_aesops13028_02855 Ef_aesops13028_02854	Ef_aesops13032_02824	Ef_aesops13034_02939 Ef_aesops13034_02938	Ef_aus0002_02686 Ef_aus0002_02685	Ef_aus0003_02809 Ef_aus0003_02808	aus0004_chr_p1-3.fna_01921 aus0004_chr_p1-3.fna_01517 aus0004_chr_p1-3.fna_01121	*	Ef_aus0006_02854	Ef_aus0007_02835	Ef_aus0009_02736	*	Ef_aus0012_02843	Ef_aus0014_02749 Ef_aus0014_02748	Ef_aus0015_02648	Ef_aus0016_02734 Ef_aus0016_02728	Ef_aus0019_02712	Ef_aus0021_02938	Ef_aus0023_02704 Ef_aus0023_02703	Ef_aus0025_02903 Ef_aus0025_02902	Ef_aus0026_02945 Ef_aus0026_02944	Ef_aus0029_03135 Ef_aus0029_03134	Ef_aus0031_02797 Ef_aus0031_02796	Ef_aus0038_02680 Ef_aus0038_02679	Ef_aus0041_03093 Ef_aus0041_03087	Ef_aus0043_02844 Ef_aus0043_02843	Ef_aus0045_02965 Ef_aus0045_02958	Ef_aus0053_02882 Ef_aus0053_02872	Ef_aus0055_03132 Ef_aus0055_03124	Ef_aus0065_02685 Ef_aus0065_02684	Ef_aus0070_03119 Ef_aus0070_03106	Ef_aus0078_03064	Ef_aus0080_02699 Ef_aus0080_02698	Ef_aus0084_02793 Ef_aus0084_02792
Ef_aus0233_chr_phage-4	849	N-acetylmuramoyl-L-alanine amidase	Ef_04112313871_02948	Ef_11-9295564_02793	*	Ef_32605238_02795	Ef_524685928_03070	Ef_9150823H_02872	Ef_aesops12030_02933 Ef_aesops12030_01733	Ef_aesops12035_01514	Ef_aesops12037_02879	Ef_aesops12038_02887	Ef_aesops12041_02904	Ef_aesops12057_02789	Ef_aesops12062_02885	Ef_aesops13004_02953	Ef_aesops13028_02847	Ef_aesops13032_02807	Ef_aesops13034_01484	*	*	aus0004_chr_p1-3.fna_02402 aus0004_chr_p1-3.fna_01438 aus0004_chr_p1-3.fna_00851	Ef_aus0005_00556	Ef_aus0006_02878	*	Ef_aus0009_01385	Ef_aus0010_02286	*	*	*	Ef_aus0016_02732	*	Ef_aus0021_02794	*	Ef_aus0025_01272 Ef_aus0025_00678	Ef_aus0026_01242 Ef_aus0026_00310	Ef_aus0029_03088 Ef_aus0029_02109	*	Ef_aus0038_02686	Ef_aus0041_01245	Ef_aus0043_00627	Ef_aus0045_01259	Ef_aus0053_02906	Ef_aus0055_03080 Ef_aus0055_02007	Ef_aus0065_02679	Ef_aus0070_03091 Ef_aus0070_01240	Ef_aus0078_03093	Ef_aus0080_02614 Ef_aus0080_00114	Ef_aus0084_02677
Ef_aus0233_chr_phage-4	2511	putative holin	Ef_04112313871_02947	Ef_11-9295564_02794	Ef_11282884_02839	Ef_32605238_02794	Ef_524685928_03069	Ef_9150823H_02871	Ef_aesops12030_02932	Ef_aesops12035_02923	Ef_aesops12037_02880	Ef_aesops12038_02886	Ef_aesops12041_02903	Ef_aesops12057_02788	Ef_aesops12062_02886	Ef_aesops13004_02952	Ef_aesops13028_02848	Ef_aesops13032_02806	Ef_aesops13034_02969	*	*	*	*	*	*	*	*	*	Ef_aus0014_02755	*	Ef_aus0016_02733	*	*	*	*	*	*	Ef_aus0031_02809	Ef_aus0038_02687	*	*	*	*	*	Ef_aus0065_02678	Ef_aus0070_03090	Ef_aus0078_03113	Ef_aus0080_02615	Ef_aus0084_02678
Ef_aus0233_chr_phage-4	1960	Integrase core domain protein	*	*	Ef_11282884_02847 Ef_11282884_02749 Ef_11282884_02459	*	*	*	*	*	*	*	*	*	*	*	*	*	*	Ef_aus0002_02715	Ef_aus0003_02660	aus0004_chr_p1-3.fna_01806	*	*	*	Ef_aus0009_02608	*	*	*	Ef_aus0015_02671	Ef_aus0016_02766	*	*	*	*	*	Ef_aus0029_02870	Ef_aus0031_02808 Ef_aus0031_02545	Ef_aus0038_02704 Ef_aus0038_02508	Ef_aus0041_02795	Ef_aus0043_02705	Ef_aus0045_02979 Ef_aus0045_02728	*	*	Ef_aus0065_02707 Ef_aus0065_02307	*	*	Ef_aus0080_02616	Ef_aus0084_02679
Ef_aus0233_chr_phage-4	3757	phage membrane protein	Ef_04112313871_02950	Ef_11-9295564_02799	*	*	Ef_524685928_03073	Ef_9150823H_02870	Ef_aesops12030_02943	Ef_aesops12035_02897	Ef_aesops12037_02894	Ef_aesops12038_02902	Ef_aesops12041_02917	Ef_aesops12057_02803	Ef_aesops12062_02899	Ef_aesops13004_02949	Ef_aesops13028_02846	Ef_aesops13032_02817	Ef_aesops13034_02936	*	*	*	*	*	*	*	*	*	Ef_aus0014_02744	*	Ef_aus0016_02724	*	*	*	*	*	*	Ef_aus0031_02787	Ef_aus0038_02671	*	*	*	*	*	Ef_aus0065_02665	Ef_aus0070_03098	Ef_aus0078_03053	Ef_aus0080_02617	Ef_aus0084_02680
Ef_aus0233_chr_phage-4	3758	site-specific tyrosine recombinase XerC-family protein	Ef_04112313871_02949	Ef_11-9295564_02798	*	*	Ef_524685928_03072	Ef_9150823H_02869	Ef_aesops12030_02942	Ef_aesops12035_02896	Ef_aesops12037_02893	Ef_aesops12038_02901	Ef_aesops12041_02916	Ef_aesops12057_02802	Ef_aesops12062_02898	Ef_aesops13004_02950	Ef_aesops13028_02845	Ef_aesops13032_02818	Ef_aesops13034_02935	*	*	*	*	*	*	*	*	*	Ef_aus0014_02745	*	Ef_aus0016_02725	*	*	*	*	*	*	Ef_aus0031_02788	Ef_aus0038_02672	*	*	*	*	*	Ef_aus0065_02666	Ef_aus0070_03099	Ef_aus0078_03054	Ef_aus0080_02618	Ef_aus0084_02682
Ef_aus0233_chr_phage-4	659	ISEf1 transposase	Ef_04112313871_02974	Ef_11-9295564_02809	Ef_11282884_02842	Ef_32605238_02814	Ef_524685928_03092	Ef_9150823H_02948	Ef_aesops12030_02955	Ef_aesops12035_02907	Ef_aesops12037_02908	Ef_aesops12038_02916	Ef_aesops12041_02930	Ef_aesops12057_02815	Ef_aesops12062_02912	Ef_aesops13004_02959	Ef_aesops13028_02863	Ef_aesops13032_02829	*	*	Ef_aus0003_02825	aus0004_chr_p1-3.fna_02014 aus0004_chr_p1-3.fna_01827 aus0004_chr_p1-3.fna_01271 aus0004_chr_p1-3.fna_01153	*	*	Ef_aus0007_02310	Ef_aus0009_02746	Ef_aus0010_02707	Ef_aus0012_02851	Ef_aus0014_00768	Ef_aus0015_02658	Ef_aus0016_00971	*	Ef_aus0021_02947	Ef_aus0023_02707	Ef_aus0025_02911	Ef_aus0026_02104	Ef_aus0029_03153	Ef_aus0031_02803	Ef_aus0038_02696	*	*	*	*	Ef_aus0055_03137	*	*	Ef_aus0078_03077	Ef_aus0080_02708	*
Ef_aus0233_chr_phage-4	3759	site-specific tyrosine recombinase XerC-family protein	*	*	*	*	*	*	Ef_aesops12030_02960	*	*	*	*	Ef_aesops12057_02819	Ef_aesops12062_02923	*	Ef_aesops13028_02870	Ef_aesops13032_02827	*	*	*	*	*	*	*	*	*	*	*	*	Ef_aus0016_02755	*	*	*	*	*	*	Ef_aus0031_02811	Ef_aus0038_02707	*	*	*	*	*	Ef_aus0065_02708	Ef_aus0070_03143	Ef_aus0078_03097	*	*
Ef_aus0233_chr_phage-4	1020	ISEnfa3, transposase	Ef_04112313871_02977 Ef_04112313871_01318	Ef_11-9295564_02812	Ef_11282884_02844 Ef_11282884_02725	Ef_32605238_02080	Ef_524685928_02981 Ef_524685928_02748 Ef_524685928_01624 Ef_524685928_00490	Ef_9150823H_02914	Ef_aesops12030_02961	Ef_aesops12035_00597	Ef_aesops12037_02914	Ef_aesops12038_02921	Ef_aesops12041_02937	Ef_aesops12057_02810	Ef_aesops12062_02195	Ef_aesops13004_02969	Ef_aesops13028_02871	*	Ef_aesops13034_00597	Ef_aus0002_01448	Ef_aus0003_02784	aus0004_chr_p1-3.fna_01934 aus0004_chr_p1-3.fna_00210 aus0004_chr_p1-3.fna_00020	*	Ef_aus0006_01099	Ef_aus0007_00957	Ef_aus0009_02734	Ef_aus0010_02717	Ef_aus0012_00799	Ef_aus0014_02428	Ef_aus0015_00967	Ef_aus0016_02314	Ef_aus0019_01536	Ef_aus0021_01172	Ef_aus0023_01281	Ef_aus0025_02908	Ef_aus0026_02949	Ef_aus0029_00597	Ef_aus0031_00426	Ef_aus0038_00426	Ef_aus0041_00680 Ef_aus0041_00599	Ef_aus0043_01036	Ef_aus0045_00584	Ef_aus0053_00800	Ef_aus0055_01292	Ef_aus0065_00386	Ef_aus0070_00808	Ef_aus0078_01049	Ef_aus0080_01860	Ef_aus0084_01909
Ef_aus0233_chr_phage-4	2831	ISEnfa3 transposase	Ef_04112313871_00436	Ef_11-9295564_01758	Ef_11282884_02806	Ef_32605238_02763 Ef_32605238_02485 Ef_32605238_01945	Ef_524685928_00960	Ef_9150823H_01607 Ef_9150823H_02913	Ef_aesops12030_01891	Ef_aesops12035_02405	Ef_aesops12037_01548	Ef_aesops12038_01548	Ef_aesops12041_01473	Ef_aesops12057_02811 Ef_aesops12057_01592	Ef_aesops12062_02196 Ef_aesops12062_02876	Ef_aesops13004_01648	Ef_aesops13028_02085	Ef_aesops13032_02836 Ef_aesops13032_01561	Ef_aesops13034_01876	*	Ef_aus0003_02211	aus0004_chr_p1-3.fna_00019 aus0004_chr_p1-3.fna_01434 aus0004_chr_p1-3.fna_00855	*	*	*	Ef_aus0009_02735	*	*	*	*	*	*	*	*	Ef_aus0025_02909	Ef_aus0026_02950	*	*	*	*	*	*	*	*	*	*	*	*	*
Ef_aus0233_chr_phage-4	775	ABC transporter ATP-binding protein	Ef_04112313871_02663	Ef_11-9295564_02511	Ef_11282884_02530	Ef_32605238_02484	Ef_524685928_02665	Ef_9150823H_02534	Ef_aesops12030_02653	Ef_aesops12035_02628	Ef_aesops12037_02633	Ef_aesops12038_02632	Ef_aesops12041_02599	Ef_aesops12057_02604	Ef_aesops12062_02613	Ef_aesops13004_02759	Ef_aesops13028_02549	Ef_aesops13032_02642	Ef_aesops13034_02628	Ef_aus0002_00826	Ef_aus0003_01249	aus0004_chr_p1-3.fna_02632	Ef_aus0005_02100	Ef_aus0006_00907	Ef_aus0007_01515	Ef_aus0009_01045	Ef_aus0010_01963	Ef_aus0012_00686	Ef_aus0014_02460	Ef_aus0015_00935	Ef_aus0016_02384	Ef_aus0019_01504	Ef_aus0021_00931	Ef_aus0023_01001	Ef_aus0025_00852	Ef_aus0026_00811	Ef_aus0029_01251	Ef_aus0031_02584	Ef_aus0038_02495	Ef_aus0041_00790	Ef_aus0043_01947	Ef_aus0045_00746	Ef_aus0053_00963	Ef_aus0055_02420	Ef_aus0065_02346	Ef_aus0070_02723	Ef_aus0078_02728	Ef_aus0080_02407	Ef_aus0084_02455
Ef_aus0233_chr_phage-4	776	ABC transporter ATP-binding protein	Ef_04112313871_02664	Ef_11-9295564_02512	Ef_11282884_02531	Ef_32605238_02483	Ef_524685928_02664	Ef_9150823H_02535	Ef_aesops12030_02654	Ef_aesops12035_02629	Ef_aesops12037_02634	Ef_aesops12038_02633	Ef_aesops12041_02600	Ef_aesops12057_02605	Ef_aesops12062_02614	Ef_aesops13004_02760	Ef_aesops13028_02550	Ef_aesops13032_02643	Ef_aesops13034_02627	Ef_aus0002_00827	Ef_aus0003_01250	aus0004_chr_p1-3.fna_02633	Ef_aus0005_02101	Ef_aus0006_00908	Ef_aus0007_01516	Ef_aus0009_01046	Ef_aus0010_01964	Ef_aus0012_00687	Ef_aus0014_02461	Ef_aus0015_00936	Ef_aus0016_02383	Ef_aus0019_01505	Ef_aus0021_00932	Ef_aus0023_01002	Ef_aus0025_00853	Ef_aus0026_00810	Ef_aus0029_01250	Ef_aus0031_02583	Ef_aus0038_02494	Ef_aus0041_00789	Ef_aus0043_01946	Ef_aus0045_00745	Ef_aus0053_00962	Ef_aus0055_02419	Ef_aus0065_02345	Ef_aus0070_02722	Ef_aus0078_02727	Ef_aus0080_02408	Ef_aus0084_02454
Ef_aus0233_chr_phage-4	777	transcriptional regulator TetR family	Ef_04112313871_02665	Ef_11-9295564_02513	Ef_11282884_02532	Ef_32605238_02482	Ef_524685928_02663	Ef_9150823H_02536	Ef_aesops12030_02655	Ef_aesops12035_02630	Ef_aesops12037_02635	Ef_aesops12038_02634	Ef_aesops12041_02601	Ef_aesops12057_02606	Ef_aesops12062_02615	Ef_aesops13004_02761	Ef_aesops13028_02551	Ef_aesops13032_02644	Ef_aesops13034_02626	Ef_aus0002_00828	Ef_aus0003_01251	aus0004_chr_p1-3.fna_02634	Ef_aus0005_02102	Ef_aus0006_00909	Ef_aus0007_01517	Ef_aus0009_01047	Ef_aus0010_01965	Ef_aus0012_00688	Ef_aus0014_02462	Ef_aus0015_00937	Ef_aus0016_02382	Ef_aus0019_01506	Ef_aus0021_00933	Ef_aus0023_01003	Ef_aus0025_00854	Ef_aus0026_00809	Ef_aus0029_01249	Ef_aus0031_02582	Ef_aus0038_02493	Ef_aus0041_00788	Ef_aus0043_01945	Ef_aus0045_00744	Ef_aus0053_00961	Ef_aus0055_02418	Ef_aus0065_02344	Ef_aus0070_02721	Ef_aus0078_02726	Ef_aus0080_02409	Ef_aus0084_02453
Ef_aus0233_chr_phage-4	778	esterase	Ef_04112313871_02666	Ef_11-9295564_02514	Ef_11282884_02533	Ef_32605238_02481	Ef_524685928_02662	Ef_9150823H_02537	Ef_aesops12030_02656	Ef_aesops12035_02631	Ef_aesops12037_02636	Ef_aesops12038_02635	Ef_aesops12041_02602	Ef_aesops12057_02607	Ef_aesops12062_02616	Ef_aesops13004_02762	Ef_aesops13028_02552	Ef_aesops13032_02645	Ef_aesops13034_02625	Ef_aus0002_00829	Ef_aus0003_01252	aus0004_chr_p1-3.fna_02635	Ef_aus0005_02103	Ef_aus0006_00910	Ef_aus0007_01518	Ef_aus0009_01048	Ef_aus0010_01966	Ef_aus0012_00689	Ef_aus0014_02463	Ef_aus0015_00938	Ef_aus0016_02381	Ef_aus0019_01507	Ef_aus0021_00934	Ef_aus0023_01004	Ef_aus0025_00855	Ef_aus0026_00808	Ef_aus0029_01248	Ef_aus0031_02581	Ef_aus0038_02492	Ef_aus0041_00787	Ef_aus0043_01944	Ef_aus0045_00743	Ef_aus0053_00960	Ef_aus0055_02417	Ef_aus0065_02343	Ef_aus0070_02720	Ef_aus0078_02725	Ef_aus0080_02410	Ef_aus0084_02452
Ef_aus0233_chr_phage-4	779	major facilitator superfamily transporter	Ef_04112313871_02667	Ef_11-9295564_02515	Ef_11282884_02534	Ef_32605238_02480	Ef_524685928_02661	Ef_9150823H_02538	Ef_aesops12030_02657	Ef_aesops12035_02632	Ef_aesops12037_02637	Ef_aesops12038_02636	Ef_aesops12041_02603	Ef_aesops12057_02608	Ef_aesops12062_02617	Ef_aesops13004_02763	Ef_aesops13028_02553	Ef_aesops13032_02646	Ef_aesops13034_02624	Ef_aus0002_00830	Ef_aus0003_01253	aus0004_chr_p1-3.fna_02636	Ef_aus0005_02104	Ef_aus0006_00911	Ef_aus0007_01519	Ef_aus0009_01049	Ef_aus0010_01967	Ef_aus0012_00690	Ef_aus0014_02464	Ef_aus0015_00939	Ef_aus0016_02380	Ef_aus0019_01508	Ef_aus0021_00935	Ef_aus0023_01005	Ef_aus0025_00856	Ef_aus0026_00807	Ef_aus0029_01247	Ef_aus0031_02580	Ef_aus0038_02491	Ef_aus0041_00786	Ef_aus0043_01943	Ef_aus0045_00742	Ef_aus0053_00959	Ef_aus0055_02416	Ef_aus0065_02342	Ef_aus0070_02719	Ef_aus0078_02724	Ef_aus0080_02411	Ef_aus0084_02451
Ef_aus0233_chr_phage-4	780	S-adenosylmethionine synthetase	Ef_04112313871_02668	Ef_11-9295564_02516	Ef_11282884_02535	Ef_32605238_02479	Ef_524685928_02660	Ef_9150823H_02539	Ef_aesops12030_02658	Ef_aesops12035_02633	Ef_aesops12037_02638	Ef_aesops12038_02637	Ef_aesops12041_02604	Ef_aesops12057_02609	Ef_aesops12062_02618	Ef_aesops13004_02764	Ef_aesops13028_02554	Ef_aesops13032_02647	Ef_aesops13034_02623	Ef_aus0002_00831	Ef_aus0003_01254	aus0004_chr_p1-3.fna_02637	Ef_aus0005_02105	Ef_aus0006_00912	Ef_aus0007_01520	Ef_aus0009_01050	Ef_aus0010_01968	Ef_aus0012_00691	Ef_aus0014_02465	Ef_aus0015_00940	Ef_aus0016_02379	Ef_aus0019_01509	Ef_aus0021_00936	Ef_aus0023_01006	Ef_aus0025_00857	Ef_aus0026_00806	Ef_aus0029_01246	Ef_aus0031_02579	Ef_aus0038_02490	Ef_aus0041_00785	Ef_aus0043_01942	Ef_aus0045_00741	Ef_aus0053_00958	Ef_aus0055_02415	Ef_aus0065_02341	Ef_aus0070_02718	Ef_aus0078_02723	Ef_aus0080_02412	Ef_aus0084_02450
Ef_aus0233_p1_phage-1	2532	transposase Mutator family	Ef_04112313871_02280	*	*	Ef_32605238_02280	Ef_524685928_02288	Ef_9150823H_02942	*	*	*	*	*	Ef_aesops12057_01719	*	Ef_aesops13004_01903	*	*	*	Ef_aus0002_02020	Ef_aus0003_02247	*	*	*	*	*	*	*	*	Ef_aus0015_02529	Ef_aus0016_02632	Ef_aus0019_02033	*	*	*	*	*	Ef_aus0031_02633	Ef_aus0038_02544	*	Ef_aus0043_02160	*	*	*	*	*	*	Ef_aus0080_02706	Ef_aus0084_02806
Ef_aus0233_p1_phage-1	4023	hypothetical protein	*	*	*	*	*	*	Ef_aesops12030_02704	Ef_aesops12035_02839	Ef_aesops12037_02916	Ef_aesops12038_02926	Ef_aesops12041_02860	*	*	*	*	*	Ef_aesops13034_02883	*	*	*	*	*	*	*	Ef_aus0010_02561	*	*	*	*	*	*	*	*	*	*	*	*	*	*	*	*	*	*	*	*	*	*
Ef_aus0233_p1_phage-1	2905	Transposase	Ef_04112313871_02984 Ef_04112313871_02773 Ef_04112313871_02576 Ef_04112313871_02568 Ef_04112313871_02521 Ef_04112313871_00725	Ef_11-9295564_02748 Ef_11-9295564_02648 Ef_11-9295564_02594	Ef_11282884_02386 Ef_11282884_02363 Ef_11282884_00888	Ef_32605238_02495	Ef_524685928_02923 Ef_524685928_02996 Ef_524685928_02893	Ef_9150823H_02511 Ef_9150823H_03063 Ef_9150823H_02703	Ef_aesops12030_02705	Ef_aesops12035_02840 Ef_aesops12035_02826 Ef_aesops12035_02517	Ef_aesops12037_02870 Ef_aesops12037_02748	Ef_aesops12038_02552	Ef_aesops12041_02940 Ef_aesops12041_02867 Ef_aesops12041_02861 Ef_aesops12041_02517	Ef_aesops12057_02107 Ef_aesops12057_02101 Ef_aesops12057_02096 Ef_aesops12057_02092 Ef_aesops12057_02087 Ef_aesops12057_02083 Ef_aesops12057_02076 Ef_aesops12057_02072	Ef_aesops12062_02925 Ef_aesops12062_02861 Ef_aesops12062_02541	Ef_aesops13004_02973	*	Ef_aesops13032_02712 Ef_aesops13032_02677 Ef_aesops13032_02673 Ef_aesops13032_02667	Ef_aesops13034_02942 Ef_aesops13034_02884 Ef_aesops13034_02448	*	Ef_aus0003_02722	*	*	*	*	*	Ef_aus0010_02727	*	*	Ef_aus0015_02672	*	*	*	Ef_aus0023_02719	*	*	*	Ef_aus0031_02813	Ef_aus0038_02709	*	*	*	*	*	*	*	*	*	*
Ef_aus0233_p1_phage-1	2246	ISL3 family transposase	Ef_04112313871_02965 Ef_04112313871_02964	Ef_11-9295564_02802 Ef_11-9295564_02801	Ef_11282884_02836	Ef_32605238_02800 Ef_32605238_02799	Ef_524685928_03088 Ef_524685928_00471	Ef_9150823H_02893 Ef_9150823H_02892	Ef_aesops12030_02949	Ef_aesops12035_02901 Ef_aesops12035_02900	Ef_aesops12037_02900 Ef_aesops12037_02899	Ef_aesops12038_02910 Ef_aesops12038_02909	Ef_aesops12041_02922 Ef_aesops12041_02921	Ef_aesops12057_02807	Ef_aesops12062_02905 Ef_aesops12062_02904	Ef_aesops13004_02954	Ef_aesops13028_02855 Ef_aesops13028_02854	Ef_aesops13032_02824	Ef_aesops13034_02939 Ef_aesops13034_02938	Ef_aus0002_02686 Ef_aus0002_02685	Ef_aus0003_02809 Ef_aus0003_02808	aus0004_chr_p1-3.fna_01921 aus0004_chr_p1-3.fna_01517 aus0004_chr_p1-3.fna_01121	*	Ef_aus0006_02854	Ef_aus0007_02835	Ef_aus0009_02736	*	Ef_aus0012_02843	Ef_aus0014_02749 Ef_aus0014_02748	Ef_aus0015_02648	Ef_aus0016_02734 Ef_aus0016_02728	Ef_aus0019_02712	Ef_aus0021_02938	Ef_aus0023_02704 Ef_aus0023_02703	Ef_aus0025_02903 Ef_aus0025_02902	Ef_aus0026_02945 Ef_aus0026_02944	Ef_aus0029_03135 Ef_aus0029_03134	Ef_aus0031_02797 Ef_aus0031_02796	Ef_aus0038_02680 Ef_aus0038_02679	Ef_aus0041_03093 Ef_aus0041_03087	Ef_aus0043_02844 Ef_aus0043_02843	Ef_aus0045_02965 Ef_aus0045_02958	Ef_aus0053_02882 Ef_aus0053_02872	Ef_aus0055_03132 Ef_aus0055_03124	Ef_aus0065_02685 Ef_aus0065_02684	Ef_aus0070_03119 Ef_aus0070_03106	Ef_aus0078_03064	Ef_aus0080_02699 Ef_aus0080_02698	Ef_aus0084_02793 Ef_aus0084_02792
Ef_aus0233_p1_phage-1	3705	ISEf1 transposase	Ef_04112313871_02959	Ef_11-9295564_02649	Ef_11282884_02843	Ef_32605238_02494	Ef_524685928_03079	Ef_9150823H_02696	Ef_aesops12030_02706	Ef_aesops12035_02841	Ef_aesops12037_02871	Ef_aesops12038_02906	Ef_aesops12041_02862	Ef_aesops12057_02692	Ef_aesops12062_02903	*	Ef_aesops13028_02842	*	Ef_aesops13034_02885	Ef_aus0002_02162	Ef_aus0003_02699	*	*	Ef_aus0006_02271	Ef_aus0007_02254	*	*	Ef_aus0012_02295	Ef_aus0014_02672	*	Ef_aus0016_02727	Ef_aus0019_02205	Ef_aus0021_02937	*	Ef_aus0025_02904	Ef_aus0026_02782	Ef_aus0029_03093	*	*	*	*	*	*	*	*	*	Ef_aus0078_03057	Ef_aus0080_02559	Ef_aus0084_02651
Ef_aus0233_p1_phage-1	1363	Transposase IS66 family protein	Ef_04112313871_02934	Ef_11-9295564_02650	Ef_11282884_02819	Ef_32605238_02493	Ef_524685928_03040	Ef_9150823H_02695	Ef_aesops12030_02707	Ef_aesops12035_02872	Ef_aesops12037_02863	Ef_aesops12038_02877	Ef_aesops12041_02894	Ef_aesops12057_02693	Ef_aesops12062_02875	*	Ef_aesops13028_02826	Ef_aesops13032_02734	Ef_aesops13034_02798	Ef_aus0002_02628	Ef_aus0003_02791	aus0004_chr_p1-3.fna_02015 aus0004_chr_p1-3.fna_01855 aus0004_chr_p1-3.fna_00014	*	Ef_aus0006_02828	Ef_aus0007_02794	Ef_aus0009_02729	Ef_aus0010_02722	Ef_aus0012_02817	Ef_aus0014_02733	Ef_aus0015_02624	Ef_aus0016_02704	Ef_aus0019_02677	Ef_aus0021_02908	Ef_aus0023_00230	Ef_aus0025_00230	Ef_aus0026_02932	Ef_aus0029_02285	Ef_aus0031_02775	Ef_aus0038_02660	Ef_aus0041_03029	Ef_aus0043_02827	Ef_aus0045_02926	Ef_aus0053_02839	Ef_aus0055_02369	Ef_aus0065_02623	Ef_aus0070_03057	Ef_aus0078_03022	Ef_aus0080_02659	Ef_aus0084_02751
Ef_aus0233_p1_phage-1	1364	transposase	Ef_04112313871_02935	Ef_11-9295564_02651	Ef_11282884_02818	Ef_32605238_02492	Ef_524685928_03041	Ef_9150823H_02694	Ef_aesops12030_02708	Ef_aesops12035_02871	Ef_aesops12037_02864	Ef_aesops12038_02876	Ef_aesops12041_02893	Ef_aesops12057_02694	Ef_aesops12062_02874	*	Ef_aesops13028_02825	Ef_aesops13032_02735	Ef_aesops13034_02799	Ef_aus0002_02629	Ef_aus0003_02792	aus0004_chr_p1-3.fna_02016 aus0004_chr_p1-3.fna_01989 aus0004_chr_p1-3.fna_01856 aus0004_chr_p1-3.fna_00013	*	Ef_aus0006_02829	Ef_aus0007_02795	*	*	Ef_aus0012_02818	Ef_aus0014_02732	Ef_aus0015_02623	Ef_aus0016_02703	Ef_aus0019_02676	Ef_aus0021_02909	Ef_aus0023_00231	Ef_aus0025_00231	Ef_aus0026_02931	Ef_aus0029_03188	Ef_aus0031_02774	Ef_aus0038_02659	Ef_aus0041_03030	Ef_aus0043_02828	Ef_aus0045_02927	Ef_aus0053_02840	Ef_aus0055_03159	Ef_aus0065_02622	Ef_aus0070_03056	Ef_aus0078_03021	Ef_aus0080_02658	Ef_aus0084_02750
Ef_aus0233_p1_phage-1	1365	hypothetical protein	Ef_04112313871_02936	Ef_11-9295564_02652	Ef_11282884_02817	Ef_32605238_02491	Ef_524685928_03042	Ef_9150823H_02693	Ef_aesops12030_02709	Ef_aesops12035_02870	Ef_aesops12037_02865	Ef_aesops12038_02875	Ef_aesops12041_02892	Ef_aesops12057_02695	Ef_aesops12062_02873	*	Ef_aesops13028_02824	Ef_aesops13032_02736	Ef_aesops13034_02800	Ef_aus0002_02630	Ef_aus0003_02793	aus0004_chr_p1-3.fna_02017 aus0004_chr_p1-3.fna_01990 aus0004_chr_p1-3.fna_01857 aus0004_chr_p1-3.fna_00012	*	Ef_aus0006_02830	Ef_aus0007_02796	Ef_aus0009_02765	*	Ef_aus0012_02819	Ef_aus0014_02731	Ef_aus0015_02622	Ef_aus0016_02702	Ef_aus0019_02675	Ef_aus0021_02910	Ef_aus0023_00232	Ef_aus0025_00232	Ef_aus0026_02930	Ef_aus0029_03189	Ef_aus0031_02773	Ef_aus0038_02658	Ef_aus0041_03031	Ef_aus0043_02829	Ef_aus0045_02928	Ef_aus0053_02841	Ef_aus0055_03160	Ef_aus0065_02621	Ef_aus0070_03055	Ef_aus0078_03020	Ef_aus0080_02657	Ef_aus0084_02749
Ef_aus0233_p1_phage-1	3998	ISEf1 transposase	*	Ef_11-9295564_02653	*	Ef_32605238_02490	*	Ef_9150823H_02692	Ef_aesops12030_02710	Ef_aesops12035_02773	Ef_aesops12037_02807	Ef_aesops12038_02815	Ef_aesops12041_02803	Ef_aesops12057_02696	Ef_aesops12062_02813	*	Ef_aesops13028_02777	*	*	*	*	*	*	*	*	*	*	*	*	*	*	*	*	*	*	*	*	*	*	*	*	*	*	*	*	*	*	*	*
Ef_aus0233_p1_phage-1	3997	hypothetical protein	*	Ef_11-9295564_02654	*	Ef_32605238_02489	*	Ef_9150823H_02691	Ef_aesops12030_02711	Ef_aesops12035_02774	Ef_aesops12037_02808	Ef_aesops12038_02816	Ef_aesops12041_02804	Ef_aesops12057_02697	Ef_aesops12062_02814	*	Ef_aesops13028_02776	*	Ef_aesops13034_02850	*	Ef_aus0003_02700	*	*	Ef_aus0006_02272	Ef_aus0007_02255	*	*	Ef_aus0012_02296	Ef_aus0014_02673	*	*	Ef_aus0019_02204	*	*	Ef_aus0025_02810	Ef_aus0026_02781	*	*	*	*	*	*	*	*	*	*	*	Ef_aus0080_02560	Ef_aus0084_02652
Ef_aus0233_p1_phage-1	3996	3-methyl-2-oxobutanoate hydroxymethyltransferase	*	Ef_11-9295564_02655	*	Ef_32605238_02488	*	Ef_9150823H_02690	Ef_aesops12030_02712	Ef_aesops12035_02775	Ef_aesops12037_02809	Ef_aesops12038_02817	Ef_aesops12041_02805	Ef_aesops12057_02698	Ef_aesops12062_02815	*	Ef_aesops13028_02775	*	Ef_aesops13034_02851	*	Ef_aus0003_02701	*	*	Ef_aus0006_02273	Ef_aus0007_02256	*	*	Ef_aus0012_02297	Ef_aus0014_02674	*	*	Ef_aus0019_02203	*	*	Ef_aus0025_02809	Ef_aus0026_02780	*	*	*	*	*	*	*	*	*	*	*	Ef_aus0080_02561	Ef_aus0084_02653
Ef_aus0233_p1_phage-1	3995	Pantothenate synthetase	*	*	*	Ef_32605238_02487	*	Ef_9150823H_02689	Ef_aesops12030_02713	Ef_aesops12035_02776	Ef_aesops12037_02810	Ef_aesops12038_02818	Ef_aesops12041_02806	Ef_aesops12057_02699	Ef_aesops12062_02816	*	Ef_aesops13028_02774	*	Ef_aesops13034_02852	*	Ef_aus0003_02702	*	*	Ef_aus0006_02274	Ef_aus0007_02257	*	*	Ef_aus0012_02298	Ef_aus0014_02675	*	*	Ef_aus0019_02202	*	*	Ef_aus0025_02808	Ef_aus0026_02779	*	*	*	*	*	*	*	*	*	*	*	Ef_aus0080_02562	Ef_aus0084_02654
Ef_aus0233_p1_phage-1	3994	Aspartate 1-decarboxylase	*	*	*	Ef_32605238_02486	*	Ef_9150823H_02688	Ef_aesops12030_02714	Ef_aesops12035_02777	Ef_aesops12037_02811	Ef_aesops12038_02819	Ef_aesops12041_02807	Ef_aesops12057_02700	Ef_aesops12062_02817	*	Ef_aesops13028_02773	*	Ef_aesops13034_02853	Ef_aus0002_02739	Ef_aus0003_02703	*	*	Ef_aus0006_02275	Ef_aus0007_02258	*	*	Ef_aus0012_02299	Ef_aus0014_02676	*	*	Ef_aus0019_02201	*	*	Ef_aus0025_02807	Ef_aus0026_02778	*	*	*	Ef_aus0041_03116	Ef_aus0043_02841	Ef_aus0045_02990	Ef_aus0053_02922	*	Ef_aus0065_02711	Ef_aus0070_03150	*	Ef_aus0080_02563	Ef_aus0084_02655
Ef_aus0233_p1_phage-1	2190	ISEfa8 transposase	Ef_04112313871_02970	*	*	*	*	*	Ef_aesops12030_02715	Ef_aesops12035_02778	*	*	Ef_aesops12041_02808	Ef_aesops12057_02820	*	Ef_aesops13004_01646	*	*	Ef_aesops13034_02854	*	Ef_aus0003_02742 Ef_aus0003_02704 Ef_aus0003_01941	aus0004_chr_p1-3.fna_01436 aus0004_chr_p1-3.fna_00853	*	*	*	Ef_aus0009_02738	Ef_aus0010_02712	*	*	Ef_aus0015_00451	*	*	*	*	Ef_aus0025_02806	*	*	Ef_aus0031_02791	Ef_aus0038_02673	*	*	*	*	*	*	*	*	*	*
Ef_aus0233_p1_phage-1	2653	integrase core domain protein	*	*	*	Ef_32605238_02823	*	*	*	Ef_aesops12035_02910	*	*	Ef_aesops12041_02934	*	*	*	*	*	Ef_aesops13034_02957	*	Ef_aus0003_02705	*	*	*	*	*	*	*	*	*	*	*	*	*	*	*	*	*	*	*	Ef_aus0043_02850	*	*	*	*	*	*	*	*
Ef_aus0233_p1_phage-1	659	ISEf1 transposase	Ef_04112313871_02974	Ef_11-9295564_02809	Ef_11282884_02842	Ef_32605238_02814	Ef_524685928_03092	Ef_9150823H_02948	Ef_aesops12030_02955	Ef_aesops12035_02907	Ef_aesops12037_02908	Ef_aesops12038_02916	Ef_aesops12041_02930	Ef_aesops12057_02815	Ef_aesops12062_02912	Ef_aesops13004_02959	Ef_aesops13028_02863	Ef_aesops13032_02829	*	*	Ef_aus0003_02825	aus0004_chr_p1-3.fna_02014 aus0004_chr_p1-3.fna_01827 aus0004_chr_p1-3.fna_01271 aus0004_chr_p1-3.fna_01153	*	*	Ef_aus0007_02310	Ef_aus0009_02746	Ef_aus0010_02707	Ef_aus0012_02851	Ef_aus0014_00768	Ef_aus0015_02658	Ef_aus0016_00971	*	Ef_aus0021_02947	Ef_aus0023_02707	Ef_aus0025_02911	Ef_aus0026_02104	Ef_aus0029_03153	Ef_aus0031_02803	Ef_aus0038_02696	*	*	*	*	Ef_aus0055_03137	*	*	Ef_aus0078_03077	Ef_aus0080_02708	*
Ef_aus0233_p1_phage-1	2949	hypothetical protein	Ef_04112313871_02920	Ef_11-9295564_02767	Ef_11282884_02794	*	Ef_524685928_03035	Ef_9150823H_02827	Ef_aesops12030_02911	*	Ef_aesops12037_02855	Ef_aesops12038_02863	Ef_aesops12041_02880	Ef_aesops12057_02776	Ef_aesops12062_02841	*	*	*	Ef_aesops13034_02898	Ef_aus0002_02622	Ef_aus0003_02827	*	*	Ef_aus0006_02808	Ef_aus0007_02789	*	*	Ef_aus0012_02803	Ef_aus0014_02729	*	Ef_aus0016_02683	Ef_aus0019_02657	Ef_aus0021_02887	*	Ef_aus0025_02879	Ef_aus0026_02905	*	*	*	Ef_aus0041_03023	Ef_aus0043_02823	Ef_aus0045_02914	Ef_aus0053_02828	*	Ef_aus0065_02604	Ef_aus0070_03035	*	Ef_aus0080_02652	Ef_aus0084_02739
Ef_aus0233_p1_phage-1	2443	IS256 family transposase	Ef_04112313871_02919	Ef_11-9295564_02768	Ef_11282884_02793	Ef_32605238_02762	Ef_524685928_03034	Ef_9150823H_02828	Ef_aesops12030_02910	Ef_aesops12035_02888	Ef_aesops12037_02854	Ef_aesops12038_02862	Ef_aesops12041_02879	Ef_aesops12057_02777	Ef_aesops12062_02840	*	Ef_aesops13028_02832	*	Ef_aesops13034_02897	Ef_aus0002_02621	Ef_aus0003_02801	*	*	Ef_aus0006_02807	Ef_aus0007_02788	*	*	Ef_aus0012_02802	Ef_aus0014_02730	*	Ef_aus0016_02682	Ef_aus0019_02656	Ef_aus0021_02888	*	Ef_aus0025_02880	Ef_aus0026_02906	*	*	*	Ef_aus0041_03022	Ef_aus0043_02822	Ef_aus0045_02913	Ef_aus0053_02827	*	Ef_aus0065_02605	Ef_aus0070_03034	*	Ef_aus0080_02653	Ef_aus0084_02740
Ef_aus0233_p1_phage-1	2831	ISEnfa3 transposase	Ef_04112313871_00436	Ef_11-9295564_01758	Ef_11282884_02806	Ef_32605238_02763 Ef_32605238_02485 Ef_32605238_01945	Ef_524685928_00960	Ef_9150823H_01607 Ef_9150823H_02913	Ef_aesops12030_01891	Ef_aesops12035_02405	Ef_aesops12037_01548	Ef_aesops12038_01548	Ef_aesops12041_01473	Ef_aesops12057_02811 Ef_aesops12057_01592	Ef_aesops12062_02196 Ef_aesops12062_02876	Ef_aesops13004_01648	Ef_aesops13028_02085	Ef_aesops13032_02836 Ef_aesops13032_01561	Ef_aesops13034_01876	*	Ef_aus0003_02211	aus0004_chr_p1-3.fna_00019 aus0004_chr_p1-3.fna_01434 aus0004_chr_p1-3.fna_00855	*	*	*	Ef_aus0009_02735	*	*	*	*	*	*	*	*	Ef_aus0025_02909	Ef_aus0026_02950	*	*	*	*	*	*	*	*	*	*	*	*	*
Ef_aus0233_p1_phage-1	1020	ISEnfa3, transposase	Ef_04112313871_02977 Ef_04112313871_01318	Ef_11-9295564_02812	Ef_11282884_02844 Ef_11282884_02725	Ef_32605238_02080	Ef_524685928_02981 Ef_524685928_02748 Ef_524685928_01624 Ef_524685928_00490	Ef_9150823H_02914	Ef_aesops12030_02961	Ef_aesops12035_00597	Ef_aesops12037_02914	Ef_aesops12038_02921	Ef_aesops12041_02937	Ef_aesops12057_02810	Ef_aesops12062_02195	Ef_aesops13004_02969	Ef_aesops13028_02871	*	Ef_aesops13034_00597	Ef_aus0002_01448	Ef_aus0003_02784	aus0004_chr_p1-3.fna_01934 aus0004_chr_p1-3.fna_00210 aus0004_chr_p1-3.fna_00020	*	Ef_aus0006_01099	Ef_aus0007_00957	Ef_aus0009_02734	Ef_aus0010_02717	Ef_aus0012_00799	Ef_aus0014_02428	Ef_aus0015_00967	Ef_aus0016_02314	Ef_aus0019_01536	Ef_aus0021_01172	Ef_aus0023_01281	Ef_aus0025_02908	Ef_aus0026_02949	Ef_aus0029_00597	Ef_aus0031_00426	Ef_aus0038_00426	Ef_aus0041_00680 Ef_aus0041_00599	Ef_aus0043_01036	Ef_aus0045_00584	Ef_aus0053_00800	Ef_aus0055_01292	Ef_aus0065_00386	Ef_aus0070_00808	Ef_aus0078_01049	Ef_aus0080_01860	Ef_aus0084_01909
Ef_aus0233_p1_phage-1	2259	ISEfa8 transposase	Ef_04112313871_02968	Ef_11-9295564_02808	Ef_11282884_02841	Ef_32605238_02811	Ef_524685928_03089	Ef_9150823H_02930	Ef_aesops12030_02954	Ef_aesops12035_02905	Ef_aesops12037_02906	Ef_aesops12038_02914	Ef_aesops12041_02929	Ef_aesops12057_02813	Ef_aesops12062_02911	Ef_aesops13004_02966 Ef_aesops13004_02748	Ef_aesops13028_02861	Ef_aesops13032_02832	Ef_aesops13034_02950	Ef_aus0002_02734	Ef_aus0003_02818	aus0004_chr_p1-3.fna_02759 aus0004_chr_p1-3.fna_02254	Ef_aus0005_00652	*	*	Ef_aus0009_02740	Ef_aus0010_02711	Ef_aus0012_02610	Ef_aus0014_02763	Ef_aus0015_02655	Ef_aus0016_02778	Ef_aus0019_02723	Ef_aus0021_02945	Ef_aus0023_01698	Ef_aus0025_02912	Ef_aus0026_02952	Ef_aus0029_03148	Ef_aus0031_01051	Ef_aus0038_01707	Ef_aus0041_03099	Ef_aus0043_02849	Ef_aus0045_02971	Ef_aus0053_02891	Ef_aus0055_03135	Ef_aus0065_02695	Ef_aus0070_03129	Ef_aus0078_03081	Ef_aus0080_02711	Ef_aus0084_01628
Ef_aus0233_p1_phage-1	2957	integrase core domain protein	Ef_04112313871_02969	Ef_11-9295564_02807	Ef_11282884_02840	Ef_32605238_02810	Ef_524685928_03090	Ef_9150823H_02929	Ef_aesops12030_02953	Ef_aesops12035_02906	Ef_aesops12037_02907	Ef_aesops12038_02913	Ef_aesops12041_02928	Ef_aesops12057_02814	Ef_aesops12062_02910	Ef_aesops13004_02967	Ef_aesops13028_02860	Ef_aesops13032_02833	Ef_aesops13034_02951	*	Ef_aus0003_02817	aus0004_chr_p1-3.fna_02255	*	Ef_aus0006_02874	Ef_aus0007_02857	Ef_aus0009_02739	Ef_aus0010_02710	*	*	Ef_aus0015_02656	*	Ef_aus0019_02724	Ef_aus0021_02946	Ef_aus0023_01699	*	*	Ef_aus0029_03149	Ef_aus0031_01050	Ef_aus0038_01708	Ef_aus0041_03100	Ef_aus0043_02848	Ef_aus0045_02972	Ef_aus0053_02890	Ef_aus0055_03136	Ef_aus0065_02696	Ef_aus0070_03130	Ef_aus0078_03082	*	*
Ef_aus0233_p1_phage-1	2922	transcriptional regulator GntR family	Ef_04112313871_02816	Ef_11-9295564_02679	Ef_11282884_02706	Ef_32605238_02651	Ef_524685928_02870	Ef_9150823H_02730	Ef_aesops12030_02800	Ef_aesops12035_02721	Ef_aesops12037_02726	Ef_aesops12038_02730	Ef_aesops12041_02722	Ef_aesops12057_02713	Ef_aesops12062_02762	*	Ef_aesops13028_02704	Ef_aesops13032_02725	Ef_aesops13034_02738	Ef_aus0002_02556	Ef_aus0003_02687	*	*	Ef_aus0006_02650	Ef_aus0007_02668	*	*	Ef_aus0012_02689	Ef_aus0014_02643	*	Ef_aus0016_02534	Ef_aus0019_02542	Ef_aus0021_02772	*	Ef_aus0025_02735	Ef_aus0026_02755	*	*	*	Ef_aus0041_02851	Ef_aus0043_02746	Ef_aus0045_02771	Ef_aus0053_02665	*	Ef_aus0065_02509	Ef_aus0070_02858	*	Ef_aus0080_02542	Ef_aus0084_02590
Ef_aus0233_p1_phage-1	2923	sugar isomerase AgaS family	Ef_04112313871_02817	Ef_11-9295564_02680	Ef_11282884_02707	Ef_32605238_02652	Ef_524685928_02871	Ef_9150823H_02731	Ef_aesops12030_02801	Ef_aesops12035_02722	Ef_aesops12037_02727	Ef_aesops12038_02731	Ef_aesops12041_02723	Ef_aesops12057_02714	Ef_aesops12062_02763	*	Ef_aesops13028_02705	Ef_aesops13032_02726	Ef_aesops13034_02739	Ef_aus0002_02557	Ef_aus0003_02688	*	*	Ef_aus0006_02651	Ef_aus0007_02669	*	*	Ef_aus0012_02690	Ef_aus0014_02644	*	Ef_aus0016_02533	Ef_aus0019_02543	Ef_aus0021_02773	*	Ef_aus0025_02736	Ef_aus0026_02756	*	*	*	Ef_aus0041_02850	Ef_aus0043_02745	Ef_aus0045_02770	Ef_aus0053_02666	*	Ef_aus0065_02508	Ef_aus0070_02857	*	Ef_aus0080_02543	Ef_aus0084_02591
Ef_aus0233_p1_phage-1	2924	Tagatose 1 6-diphosphate aldolase	Ef_04112313871_02818	Ef_11-9295564_02681	Ef_11282884_02708	Ef_32605238_02653	Ef_524685928_02872	Ef_9150823H_02732	Ef_aesops12030_02802	Ef_aesops12035_02723	Ef_aesops12037_02728	Ef_aesops12038_02732	Ef_aesops12041_02724	Ef_aesops12057_02715	Ef_aesops12062_02764	*	Ef_aesops13028_02706	Ef_aesops13032_02727	Ef_aesops13034_02740	Ef_aus0002_02558	Ef_aus0003_02689	*	*	Ef_aus0006_02652	Ef_aus0007_02670	*	*	Ef_aus0012_02691	Ef_aus0014_02645	*	Ef_aus0016_02532	Ef_aus0019_02544	Ef_aus0021_02774	*	Ef_aus0025_02737	Ef_aus0026_02757	*	*	*	Ef_aus0041_02849	Ef_aus0043_02744	Ef_aus0045_02769	Ef_aus0053_02667	*	Ef_aus0065_02507	Ef_aus0070_02856	*	Ef_aus0080_02544	Ef_aus0084_02592
Ef_aus0233_p1_phage-1	2925	hypothetical protein	Ef_04112313871_02819	Ef_11-9295564_02682	Ef_11282884_02709	Ef_32605238_02654	Ef_524685928_02873	Ef_9150823H_02733	Ef_aesops12030_02803	Ef_aesops12035_02724	Ef_aesops12037_02729	Ef_aesops12038_02733	Ef_aesops12041_02725	Ef_aesops12057_02716	Ef_aesops12062_02765	*	Ef_aesops13028_02707	Ef_aesops13032_02728	Ef_aesops13034_02741	Ef_aus0002_02559	Ef_aus0003_02690	*	*	Ef_aus0006_02653	Ef_aus0007_02671	*	*	Ef_aus0012_02692	Ef_aus0014_02646	*	Ef_aus0016_02531	Ef_aus0019_02545	Ef_aus0021_02775	*	Ef_aus0025_02738	Ef_aus0026_02758	*	*	*	Ef_aus0041_02848	Ef_aus0043_02743	Ef_aus0045_02768	Ef_aus0053_02668	*	Ef_aus0065_02506	Ef_aus0070_02855	*	Ef_aus0080_02545	Ef_aus0084_02593
Ef_aus0233_p1_phage-1	2926	PTS system lactose/cellobiose-specific IIC component	Ef_04112313871_02820	Ef_11-9295564_02683	Ef_11282884_02710	Ef_32605238_02655	Ef_524685928_02874	Ef_9150823H_02734	Ef_aesops12030_02804	Ef_aesops12035_02725	Ef_aesops12037_02730	Ef_aesops12038_02734	Ef_aesops12041_02726	Ef_aesops12057_02717	Ef_aesops12062_02766	*	Ef_aesops13028_02708	Ef_aesops13032_02729	Ef_aesops13034_02742	Ef_aus0002_02560	Ef_aus0003_02691	*	*	Ef_aus0006_02654	Ef_aus0007_02672	*	*	Ef_aus0012_02693	Ef_aus0014_02647	*	Ef_aus0016_02530	Ef_aus0019_02546	Ef_aus0021_02776	*	Ef_aus0025_02739	Ef_aus0026_02759	*	*	*	Ef_aus0041_02847	Ef_aus0043_02742	Ef_aus0045_02767	Ef_aus0053_02669	*	Ef_aus0065_02505	Ef_aus0070_02854	*	Ef_aus0080_02546	Ef_aus0084_02594
Ef_aus0233_p1_phage-1	2263	Integrase	Ef_04112313871_02978	*	Ef_11282884_02849	*	Ef_524685928_03104	*	*	*	*	*	*	*	*	*	*	*	*	*	Ef_aus0003_02829	aus0004_chr_p1-3.fna_02471 aus0004_chr_p1-3.fna_02221 aus0004_chr_p1-3.fna_01985 aus0004_chr_p1-3.fna_01873 aus0004_chr_p1-3.fna_01800 aus0004_chr_p1-3.fna_01557 aus0004_chr_p1-3.fna_01388 aus0004_chr_p1-3.fna_01270 aus0004_chr_p1-3.fna_01013 aus0004_chr_p1-3.fna_00962 aus0004_chr_p1-3.fna_00692 aus0004_chr_p1-3.fna_00309	Ef_aus0005_02559	Ef_aus0006_02879	Ef_aus0007_02862	*	Ef_aus0010_02719	Ef_aus0012_02860	Ef_aus0014_02759	Ef_aus0015_02669	Ef_aus0016_02754	Ef_aus0019_02737	Ef_aus0021_02957	Ef_aus0023_02711	Ef_aus0025_02914	Ef_aus0026_02959	Ef_aus0029_03167	Ef_aus0031_02810	Ef_aus0038_02706	*	Ef_aus0043_02851	*	*	Ef_aus0055_03149	*	*	Ef_aus0078_03096	*	*
Ef_aus0233_p1_phage-1	2934	Tyrosine recombinase XerS	Ef_04112313871_02869	Ef_11-9295564_02707	Ef_11282884_02773	Ef_32605238_02678	Ef_524685928_02977	Ef_9150823H_02763	Ef_aesops12030_02815	Ef_aesops12035_02754	Ef_aesops12037_02757	Ef_aesops12038_02760	Ef_aesops12041_02757	Ef_aesops12057_02724	Ef_aesops12062_02781	Ef_aesops13004_02843	Ef_aesops13028_02742	Ef_aesops13032_02686	Ef_aesops13034_02802	Ef_aus0002_02675	Ef_aus0003_02734	*	Ef_aus0005_02545	Ef_aus0006_02709	Ef_aus0007_02703	Ef_aus0009_02656	Ef_aus0010_02547	Ef_aus0012_02731	Ef_aus0014_02734	*	Ef_aus0016_02567	Ef_aus0019_02574	Ef_aus0021_02836	*	Ef_aus0025_02907	Ef_aus0026_02937	Ef_aus0029_02172	*	*	Ef_aus0041_02954	Ef_aus0043_02793	Ef_aus0045_02666	Ef_aus0053_02749	Ef_aus0055_02247	Ef_aus0065_02406	Ef_aus0070_02789	Ef_aus0078_02259	Ef_aus0080_02672	Ef_aus0084_02762
Ef_aus0233_p1_phage-1	2933	hypothetical protein	Ef_04112313871_02868	Ef_11-9295564_02706	Ef_11282884_02772	Ef_32605238_02677	Ef_524685928_02976	Ef_9150823H_02762	Ef_aesops12030_02814	Ef_aesops12035_02753	Ef_aesops12037_02756	Ef_aesops12038_02759	Ef_aesops12041_02756	Ef_aesops12057_02723	Ef_aesops12062_02780	*	Ef_aesops13028_02741	Ef_aesops13032_02685	Ef_aesops13034_02801	Ef_aus0002_02163	Ef_aus0003_02733	*	*	Ef_aus0006_02708	Ef_aus0007_02702	Ef_aus0009_02659	*	Ef_aus0012_02730	Ef_aus0014_02728	*	Ef_aus0016_02566	Ef_aus0019_02573	Ef_aus0021_02835	*	Ef_aus0025_02862	Ef_aus0026_02893	Ef_aus0029_02169	*	*	Ef_aus0041_02956	Ef_aus0043_02794	Ef_aus0045_02665	Ef_aus0053_02748	Ef_aus0055_02244	Ef_aus0065_02405	Ef_aus0070_02788	*	Ef_aus0080_02646	Ef_aus0084_02724
Ef_aus0233_p1_phage-1	2259	ISEfa8 transposase	Ef_04112313871_02968	Ef_11-9295564_02808	Ef_11282884_02841	Ef_32605238_02811	Ef_524685928_03089	Ef_9150823H_02930	Ef_aesops12030_02954	Ef_aesops12035_02905	Ef_aesops12037_02906	Ef_aesops12038_02914	Ef_aesops12041_02929	Ef_aesops12057_02813	Ef_aesops12062_02911	Ef_aesops13004_02966 Ef_aesops13004_02748	Ef_aesops13028_02861	Ef_aesops13032_02832	Ef_aesops13034_02950	Ef_aus0002_02734	Ef_aus0003_02818	aus0004_chr_p1-3.fna_02759 aus0004_chr_p1-3.fna_02254	Ef_aus0005_00652	*	*	Ef_aus0009_02740	Ef_aus0010_02711	Ef_aus0012_02610	Ef_aus0014_02763	Ef_aus0015_02655	Ef_aus0016_02778	Ef_aus0019_02723	Ef_aus0021_02945	Ef_aus0023_01698	Ef_aus0025_02912	Ef_aus0026_02952	Ef_aus0029_03148	Ef_aus0031_01051	Ef_aus0038_01707	Ef_aus0041_03099	Ef_aus0043_02849	Ef_aus0045_02971	Ef_aus0053_02891	Ef_aus0055_03135	Ef_aus0065_02695	Ef_aus0070_03129	Ef_aus0078_03081	Ef_aus0080_02711	Ef_aus0084_01628
Ef_aus0233_p1_phage-1	2957	integrase core domain protein	Ef_04112313871_02969	Ef_11-9295564_02807	Ef_11282884_02840	Ef_32605238_02810	Ef_524685928_03090	Ef_9150823H_02929	Ef_aesops12030_02953	Ef_aesops12035_02906	Ef_aesops12037_02907	Ef_aesops12038_02913	Ef_aesops12041_02928	Ef_aesops12057_02814	Ef_aesops12062_02910	Ef_aesops13004_02967	Ef_aesops13028_02860	Ef_aesops13032_02833	Ef_aesops13034_02951	*	Ef_aus0003_02817	aus0004_chr_p1-3.fna_02255	*	Ef_aus0006_02874	Ef_aus0007_02857	Ef_aus0009_02739	Ef_aus0010_02710	*	*	Ef_aus0015_02656	*	Ef_aus0019_02724	Ef_aus0021_02946	Ef_aus0023_01699	*	*	Ef_aus0029_03149	Ef_aus0031_01050	Ef_aus0038_01708	Ef_aus0041_03100	Ef_aus0043_02848	Ef_aus0045_02972	Ef_aus0053_02890	Ef_aus0055_03136	Ef_aus0065_02696	Ef_aus0070_03130	Ef_aus0078_03082	*	*
[truncated: 63 more columns]
